# Supplementary material
Source: PubMed Central journal article supplement (PMC4012576)
Supplement: supp_pp.113.234989_234989revSupplemental_Material_040314_AC.pdf [file supp_pp.113.234989_234989revSupplemental_Material_040314_AC.pdf]

## SUPPLEMENTAL MATERIAL

New Generation of Artificial MicroRNA and Synthetic *Trans*-Acting Small Interfering RNA Vectors for Efficient Gene Silencing in Arabidopsis

Alberto Carbonell, Atsushi Takeda, Noah Fahlgren, Simon C. Johnson, Josh T. Cuperus and James C. Carrington

**Supplemental Figure S1.** *AtMIR390a-B/c* vectors for direct cloning of amiRNAs.

**Supplemental Figure S2.** , Diagrams of *AtMIR319a*, *AtMIR319a-21* and *AtMIR390a* foldbacks used to express several amiRNAs in *N. benthamiana*.

**Supplemental Figure S3.** Base-pairing of amiRNAs and target mRNAs.

**Supplemental Figure S4.** *AtTAS1c-B/c* vectors for direct cloning of syn-tasiRNAs.

**Supplemental Figure S5.** Organization of syn-tasiRNA constructs.

**Supplemental Figure S6.** Flowering time analysis of Arabidopsis Col-0 T1 transgenic plants expressing amiRNAs or syn-tasiRNAs.

**Supplemental Figure S7.** Processing analyses of syn-tasiRNAs expressed in Arabidopsis Col-0 T1 transgenic lines (*35S:AtTAS1c-D3Trich-D4Ft* and *35S:AtTAS1c-D3Ft-D4Trich*).

**Supplemental Figure S8.** Processing and phasing analyses of endogenous *AtTAS1c*-tasiRNA in Arabidopsis Col-0 T1 transgenic lines expressing syn-tasiRNAs (*35S:AtTAS1c-D3Trich-D4Ft*, *35S:AtTAS1c-D3Ft-D4Trich* and *35S:GUS* control).

**Supplemental Figure S9.** Processing analyses of endogenous *AtTAS1c*-derived siRNAs in Arabidopsis Col-0 T1 transgenic plants expressing syn-tasiRNAs (*35S:AtTAS1c-D3Trich-D4Ft*, *35S:AtTAS1c-D3Ft-D4Trich* and *35S:GUS* control).

**Supplemental Table SI.** Phenotypic penetrance of amiRNAs expressed in *A. thaliana* Col-0 T1 transgenic plants.

**Supplemental Table SII.** Phenotypic penetrance of amiRNAs or syn-tasiRNAs expressed in *A. thaliana* Col-0 T1 transgenic plants.

**Supplemental Table SIII.** Phenotypic penetrance of amiRNAs or syn-tasiRNAs expressed in *A. thaliana* Col-0 T2 transgenic plants.

**Supplemental Table SIV.** DNA oligonucleotides used in this study.

**Supplemental Table SV.** Sequences and predicted targets for all the amiRNAs and syn-tasiRNAs used in this study.

**Supplemental Table SVI.** Summary of high-throughput small RNA libraries from *A. thaliana* transgenic lines.

**Supplemental Table SVII.** miRBase Locus Identifiers of the Arabidopsis conserved *MIRNA* precursors used in this study.

**Supplemental Table SVIII.** miRBase Locus Identifiers of those plant *MIRNA* precursors previously used for expressing amiRNAs.

**Supplemental Protocol S1.** Protocol to design and clone amiRNAs or syn-tasiRNAs in *BsaI/ccdB*-based ('B/c') vectors containing the *AtMIR390a* or *AtTAS1c* precursors, respectively.

**Supplemental Text S1.** DNA sequence in FASTA format of all *MIRNA* foldbacks used in this study to express and analyze amiRNAs.

**Supplemental Text S2.** DNA sequence in FASTA format of all *AtTAS1c*-based constructs used to express and analyze syn-tasiRNAs.

**Supplemental Text S3.** DNA sequence of *BsaI-ccdB*-based (B/c) vectors used for direct cloning of amiRNAs or syn-tasiRNAs.

**Supplemental References.**

**AtMIR390a-BsaI/ccdB-based (B/c) vectors for direct cloning of artificial miRNAs**

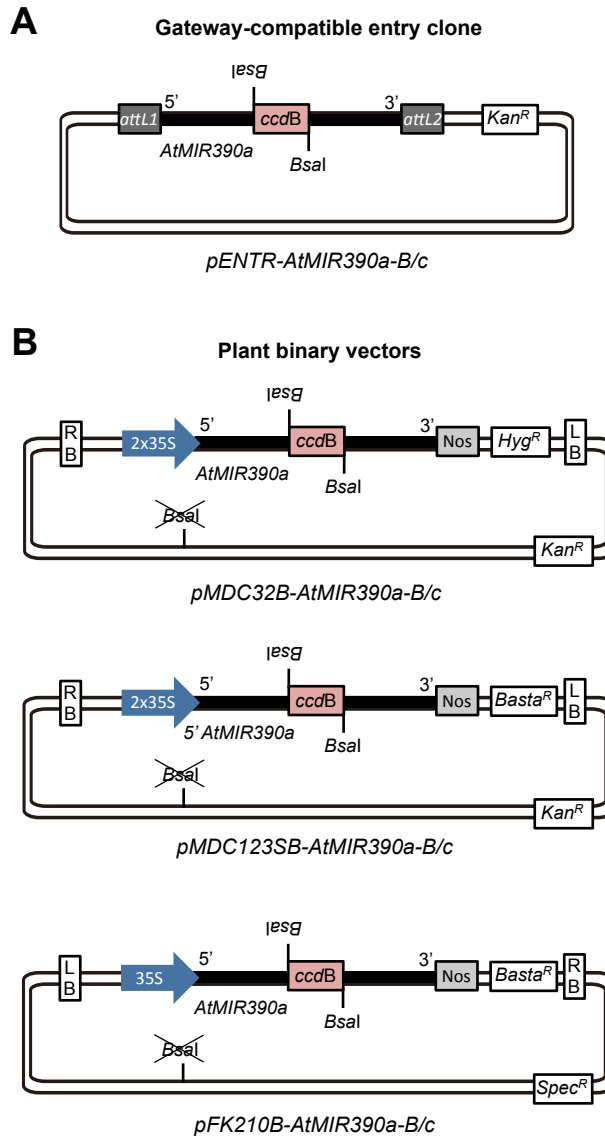

**Supplemental Figure S1.** *AtMIR390a-B/c* vectors for direct cloning of amiRNAs. A, Diagram of an *AtMIR390a-B/c* Gateway-compatible entry vector (*pENTR-AtMIR390a-B/c*). B, Diagrams of *AtMIR390a-B/c*-based binary vectors for expression of amiRNAs in plants (*pMDC32B-AtMIR390a-B/c*, *pMDC123SB-AtMIR390a-B/c* and *pFK210B-AtMIR390a-B/c*). RB: right border; 35S: *Cauliflower mosaic virus* promoter; *BsaI*: *BsaI* recognition site, *ccdB*: gene encoding the *ccdB* toxin; LB: left border; attL1 and attL2: gateway recombination sites. *Kan<sup>R</sup>*: kanamycin resistance gene; *Hyg<sup>R</sup>*: hygromycin resistance gene; *Basta<sup>R</sup>*: glufosinate resistance gene; *Spec<sup>R</sup>*: spectinomycin resistance gene. Undesired *BsaI* sites removed from the plasmid are crossed out.

### AtMIR319a-based amiRNAs

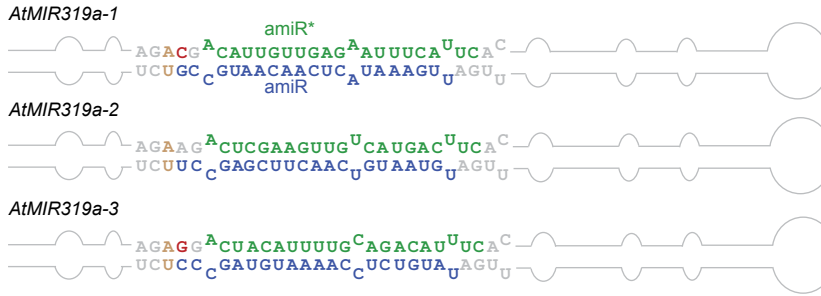

### AtMIR319a-21-based amiRNAs

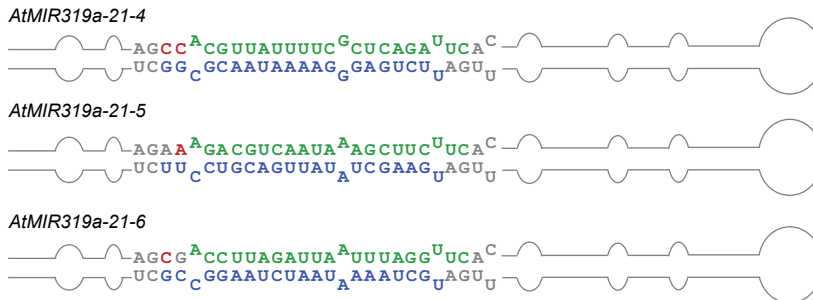

### AtMIR390a-based amiRNAs

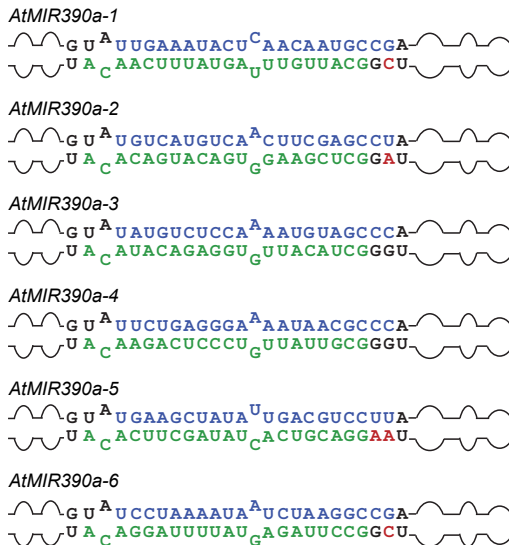

**Supplemental Figure S2.** , Diagrams of *AtMIR319a*, *AtMIR319a-21* and *AtMIR390a* foldbacks used to express several amiRNAs in *N. benthamiana*. Nucleotides corresponding to the miRNA guide and miRNA\* are in blue and green, respectively. Other nucleotides from the *AtMIR319a*, *AtMIR319a-21* and *AtMIR390a* foldbacks are in light grey, dark grey, and black, respectively. Nucleotides that were added or modified that are in light brown and red, respectively. Shapes of the *AtMIR319a*, *AtMIR319a-21* and *AtMIR390a* foldbacks are in light grey, dark grey, and black, respectively.

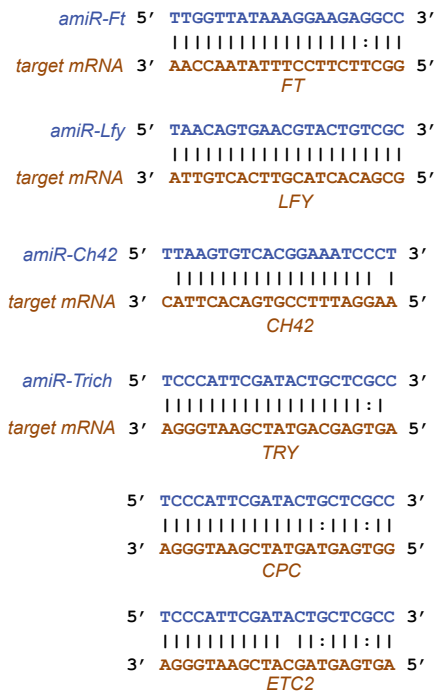

**Supplemental Figure S3.** Base-pairing of amiRNAs and target mRNAs. amiRNA and mRNA target nucleotides are in blue and brown, respectively.

***AtTAS1c*-*BsaI*/*ccdB*-based (B/c) vectors for direct cloning of synthetic tasiRNAs**

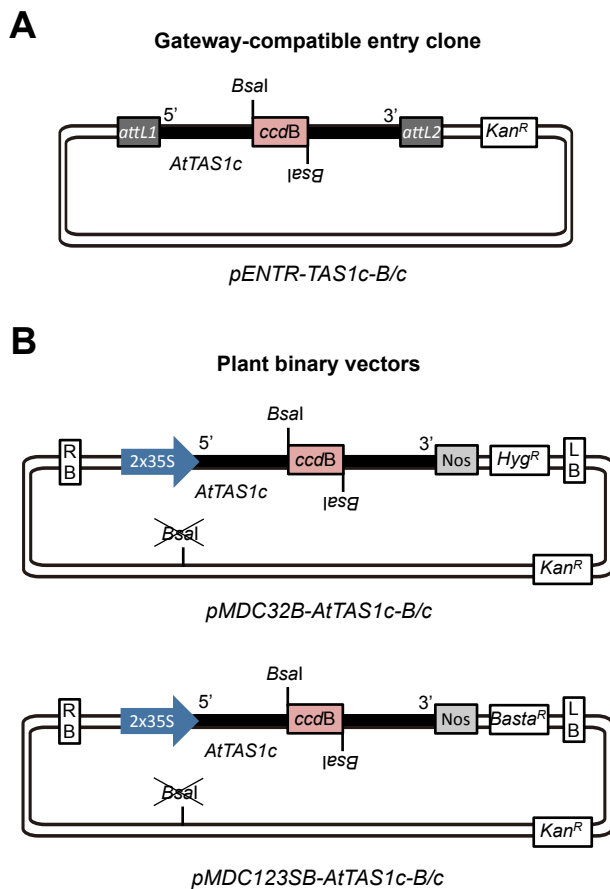

**Supplemental Figure S4.** *AtTAS1c*-*B/c* vectors for direct cloning of syn-tasiRNAs. A, Diagram of an *AtTAS1c*-*B/c* Gateway-compatible entry vector (*pENTR-AtTAS1c-B/c*). B, Diagrams of *AtTAS1c*-*B/c* binary vectors for expression of syn-tasiRNAs in plants (*pMDC32B-AtTAS1c-B/c*, *pMDC123SB-AtTAS1c-B/c* and *pFK210B-AtTAS1c-B/c*). RB: right border; 35S: *Cauliflower mosaic virus* promoter; *BsaI*: *BsaI* recognition site, *ccdB*: gene encoding the *ccdB* toxin; LB: left border; attL1 and attL2: GATEWAY recombination sites. *Kan<sup>R</sup>*: kanamycin resistance gene; *Hyg<sup>R</sup>*: hygromycin resistance gene; *Basta<sup>R</sup>*: glufosinate resistance gene; *Spec<sup>R</sup>*: spectinomycin resistance gene. Undesired *BsaI* sites removed from the plasmid are crossed out.

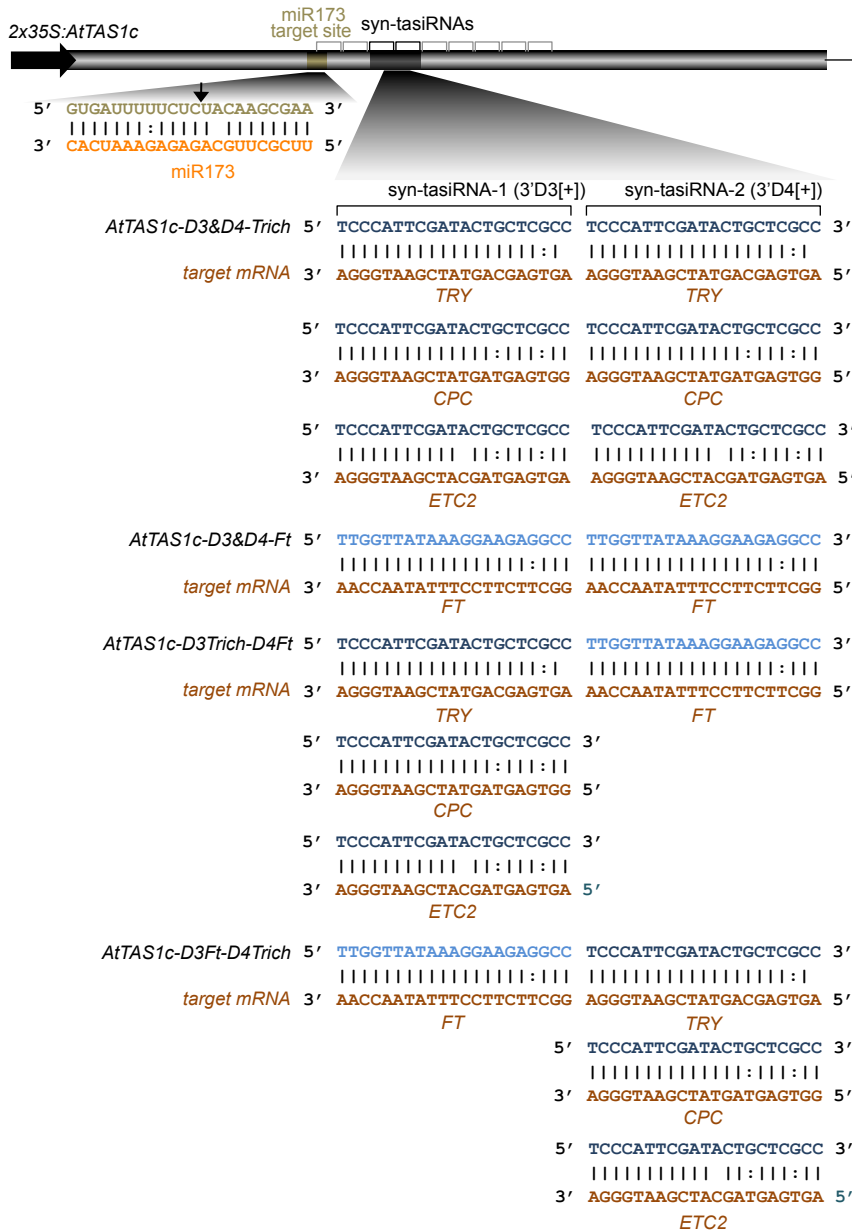

**Supplemental Figure S5. A.** Organization of syn-tasiRNA constructs. Arrow indicates miR173-guided cleavage site. tasiRNA positions 3'D1[+] to 3'D10[+] are indicated by brackets, with positions 3'D3[+] and 3'D4[+] highlighted in black. The expected syn-tasiRNA-mRNA target interactions are represented. miR173, syn-tasiR-Trich and syn-tasiR-Ft sequences are in orange, dark blue and light blue, respectively. miR173 target site and syn-tasiRNA-mRNA target sequences are in light and dark brown, respectively.

### Flowering time quantification

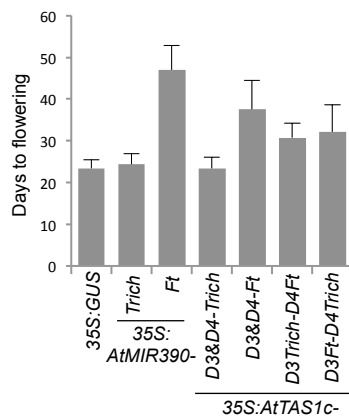

**Supplemental Figure S6.** Flowering time analysis of Arabidopsis Col-0 T1 transgenic plants expressing amiRNAs or syn-tasiRNAs. Mean (+ s.d.) days to flowering.



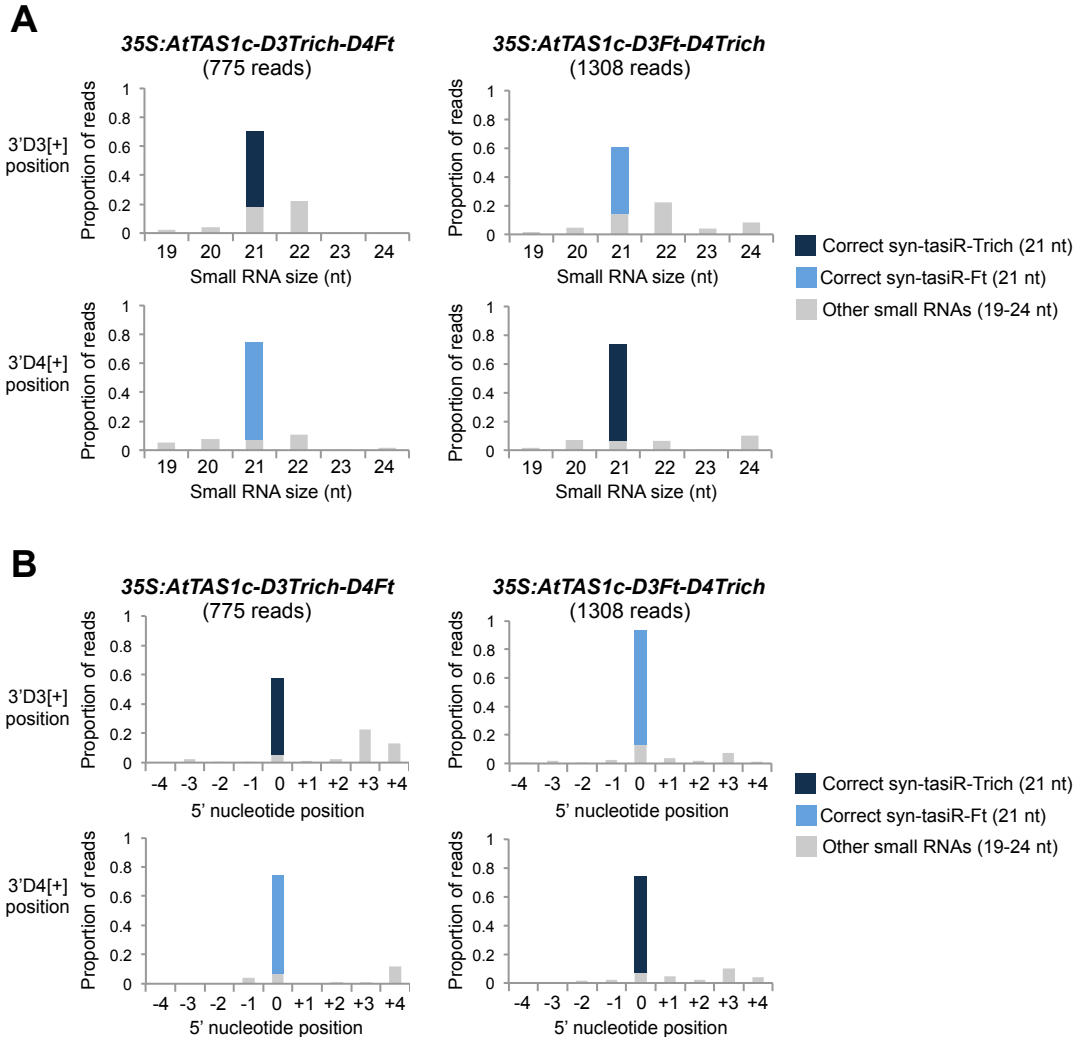

**Supplemental Figure S7.** Processing analyses of syn-tasiRNAs expressed in Arabidopsis Col-0 T1 transgenic lines (*35S:AtTAS1c-D3Trich-D4Ft* and *35S:AtTAS1c-D3Ft-D4Trich*). A, Small RNA size distribution of 19-24 nt siRNAs in both 3'D3[+] (up) and 3'D4[+] (bottom) positions in *35S:AtTAS1c-D3Trich-D4Ft* (left) and *35S:AtTAS1c-D3Ft-D4Trich* (right) transgenic plants. Correct syn-tasiR-Trich and syn-tasiR-Ft sequences are in dark and light blue, respectively. Other small RNA sequences are in grey. B, Distribution of small RNA reads (19-24 nt) having a 5' nucleotide within a -4/+4 region relative to the correct 5' nucleotide position of the syn-tasiRNA ('0' position). Other details as in panel A.

## Endogenous *AtTAS1c*-tasiRNA processing and phasing analyses in Arabidopsis

### 35S:*GUS*

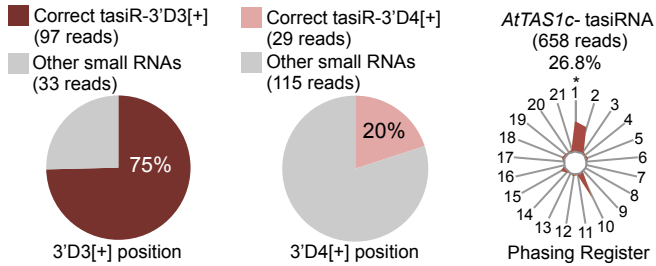

### 35S:*AtTAS1c-D3Trich-D4Ft*

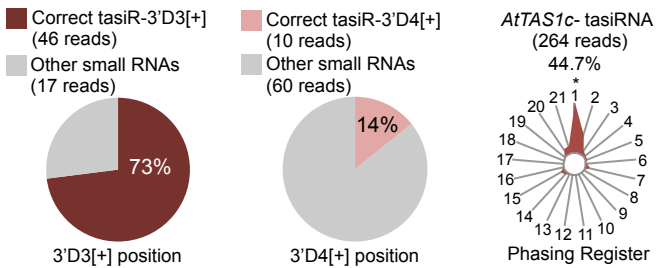

### 35S:*AtTAS1c-D3Ft-D4Trich*

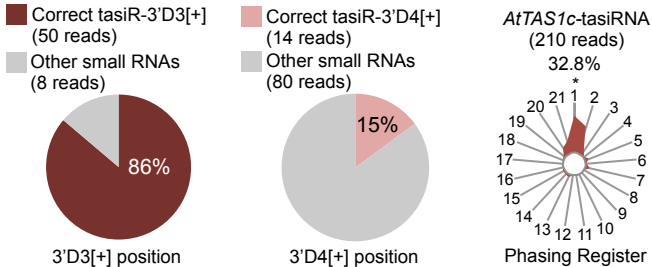

**Supplemental Figure S8.** Processing and phasing analyses of endogenous *AtTAS1c*-tasiRNA in Arabidopsis Col-0 T1 transgenic lines expressing syn-tasiRNAs (*35S:AtTAS1c-D3Trich-D4Ft*, *35S:AtTAS1c-D3Ft-D4Trich* and *35S:GUS* control). Analyses of tasiR-3'D3[+] and tasiR-3'D4[+] (*AtTAS1c*-derived) siRNA sequences by high-throughput sequencing. Pie charts, percentage of 19-24 nt reads; radar plots, percentages of 21-nt reads corresponding to each register from *AtTAS1c* transcripts, with position 1 designated as immediately after the miR173-guided cleavage site.

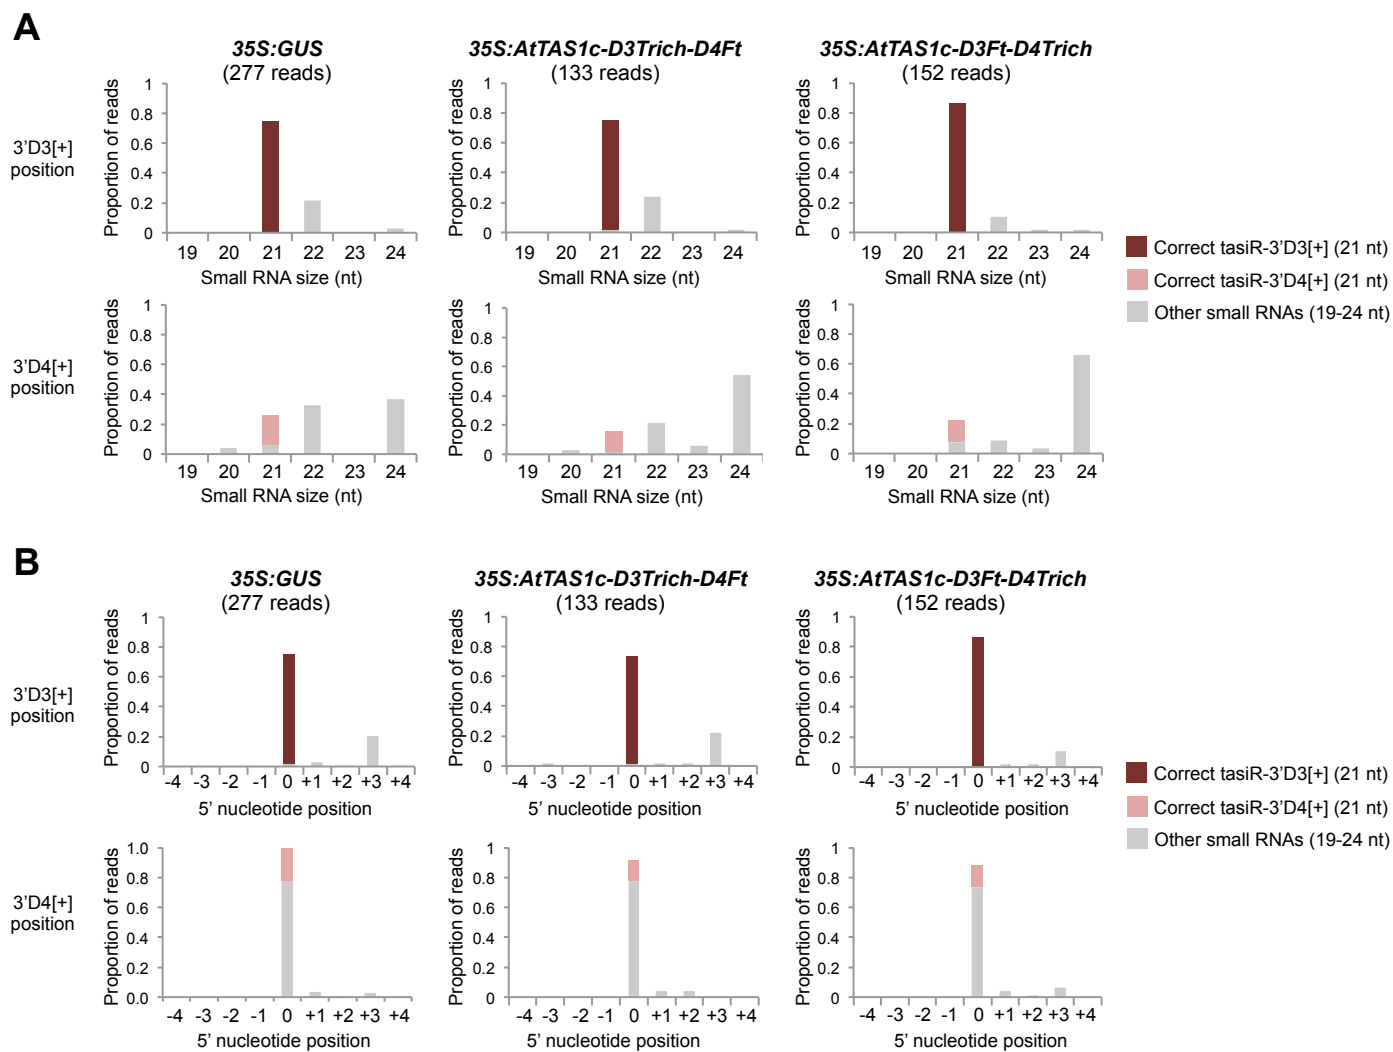

**Supplemental Figure S9.** Processing analyses of endogenous *AtTAS1c*-derived siRNAs in Arabidopsis Col-0 T1 transgenic plants expressing syn-tasiRNAs (*35S:AtTAS1c-D3Trich-D4Ft*, *35S:AtTAS1c-D3Ft-D4Trich* and *35S:GUS* control). A, Small RNA size distribution of 19-24 nt siRNAs in both 3'D3[+] (up) and 3'D4[+] (bottom) positions in *35S:AtTAS1c-D3Trich-D4Ft* (left) and *35S:AtTAS1c-D3Ft-D4Trich* (right) transgenic plants. Correct tasiR-3'D3[+] and tasiR-3'D4[+] sequences are in dark and light pink, respectively. Other small RNA sequences are in grey. B, Distribution of small RNA reads (19-24 nt) having a 5' nucleotide within a -4/+4 region relative to the correct 5' nucleotide position of the endogenous tasiRNA (0' position). Other details are as in panel A.

**Supplemental Table SI:** Phenotypic penetrance of amiRNAs expressed in *A. thaliana* Col-0 T1 transgenic plants

| Construct                  | T1 analyzed | Phenotypic penetrance <sup>a</sup> |
|----------------------------|-------------|------------------------------------|
| <i>35S:AtMIR390a-Ft</i>    | 34          | 100%                               |
| <i>35S:AtMIR390a-Lfy</i>   | 67          | 34%                                |
| <i>35S:AtMIR390a-Ch42</i>  | 101         | 97%                                |
|                            |             | 10% weak                           |
|                            |             | 25% intermediate                   |
|                            |             | 62% severe                         |
| <i>35S:AtMIR390a-Trich</i> | 53          | 98%                                |
|                            |             | 29% <i>try cpc</i> type            |

<sup>a</sup>The Ft phenotype was defined as a higher 'days to flowering' value when compared to the average 'days to flowering' value of the *35S:GUS* control set.

The Lfy phenotype was defined as a higher 'number of secondary shoots' when compared to the average 'number of secondary shoots' value of the *35S:GUS* control set.

The Ch42 phenotype was scored in 10 days-old seedling and was considered 'weak', 'intermediate' or 'severe' if seedlings have >2 leaves, exactly 2 leaves or no leaves (only 2 cotyledons), respectively.

The Trich phenotype was defined as a higher number of trichomes when compared to transformants of the *35S:GUS* control set. Plants with a Trich phenotype were considered '*try cpc* type' if they resembled the Arabidopsis *try cpc* double mutant.

| <b>Supplemental Table SII: Phenotypic penetrance of amiRNAs or syn-tasiRNAs expressed in <i>A. thaliana</i> Col-0 T1 transgenic plants</b> |             |                                                                    |
|--------------------------------------------------------------------------------------------------------------------------------------------|-------------|--------------------------------------------------------------------|
| Construct                                                                                                                                  | T1 analyzed | Phenotypic penetrance <sup>a</sup>                                 |
| <i>35S:AtMIR390-Trich</i>                                                                                                                  | 92          | 95%<br>20% <i>try cpc</i> type                                     |
| <i>35S:AtMIR390-Ft</i>                                                                                                                     | 95          | 95%                                                                |
| <i>35S:TAS1c-D3&amp;D4Trich</i>                                                                                                            | 73          | 82%<br>0% <i>try cpc</i> type                                      |
| <i>35S:TAS1c-D3&amp;D4Ft</i>                                                                                                               | 47          | 100%                                                               |
| <i>35S:TAS1c-D3Trich-D4Ft</i>                                                                                                              | 43          | 74% Trich<br>0% <i>try cpc</i> type<br>98% Ft<br>73% Trich and Ft  |
| <i>35S:TAS1c-D3Ft-D4Trich</i>                                                                                                              | 68          | 62% Trich<br>0% <i>try cpc</i> type<br>100% Ft<br>62% Trich and Ft |

<sup>a</sup> The Ft phenotype was defined as a higher 'days to flowering' value when compared to the average 'days to flowering' value of the *35S:GUS* control set.

The Trich phenotype was defined as a higher number of trichomes when compared to transformants of the *35S:GUS* control set. Plants with a Trich phenotype were considered '*try cpc* type' if they resembled the *Arabidopsis try cpc* double mutant.

| <b>Supplemental Table SIII: Phenotypic penetrance of amiRNAs or syn-tasiRNAs expressed in <i>A. thaliana</i> Col-0 T2 transgenic plants</b> |                          |                                    |
|---------------------------------------------------------------------------------------------------------------------------------------------|--------------------------|------------------------------------|
| Construct                                                                                                                                   | T2 analyzed <sup>a</sup> | Phenotypic penetrance <sup>b</sup> |
| <i>35S:AtMIR390-Trich</i>                                                                                                                   | 10                       | 90%<br>100% <i>try cpc</i> type    |
| <i>35S:TAS1c-D3&amp;D4Trich</i>                                                                                                             | 10                       | 80%<br>0% <i>try cpc</i> type      |
| <i>35S:TAS1c-D3Trich-D4Ft</i>                                                                                                               | 10                       | 90%<br>0% <i>try cpc</i> type      |
| <i>35S:TAS1c-D3Ft-D4Trich</i>                                                                                                               | 10                       | 90%<br>0% <i>try cpc</i> type      |

<sup>a</sup> 80-100 individuals for each T2 independent line were analyzed.

<sup>b</sup> The Trich phenotype was defined as a higher number of trichomes when compared to transformants of the *35S:GUS* control set. Plants with a Trich phenotype were considered '*try cpc* type' if they resembled the *Arabidopsis try cpc* double mutant.

**Supplemental Table SIV. DNA oligonucleotides used.**

| Oligonucleotide Name | Sequence                                                                     |
|----------------------|------------------------------------------------------------------------------|
| 3'PCR primer i1      | CAAGCAGAAGACGGCATAACGAAATCGATTGATGGTGCCTACAG                                 |
| 3'PCR primer i3      | CAAGCAGAAGACGGCATAACGACATCTGATTGATGGTGCCTACAG                                |
| 3'PCR primer i4      | CAAGCAGAAGACGGCATAACGAAACGTAATTGATGGTGCCTACAG                                |
| 3'PCR primer i5      | CAAGCAGAAGACGGCATAACGATGGTAAATGATGGTGCCTACAG                                 |
| 3'PCR primer i9      | CAAGCAGAAGACGGCATAACGAATTGGCATTGATGGTGCCTACAG                                |
| 5'PCR primer P5      | AATGATACGGCGACCACCGACAGGTTACAGATTCTACAGTCCGA                                 |
| AtMIR319a-1-I        | GATTGAAATACTCAACAATGCCGCTCTCTCTTTTGTATTCC                                    |
| AtMIR319a-1-II       | GACGGCATTGTTGAGTATTTCAATCAAAGAGAATCAATGA                                     |
| AtMIR319a-1-III      | GACGACATTGTTGAGAATTTCAATCACAGGTCGTGATATG                                     |
| AtMIR319a-1-IV       | GAATGAAATTTCTCAACAATGTCGTCTACATATATATTCCCT                                   |
| AtMIR319a-2-I        | GATGTATGTCAACTTCGAGCCTTCTCTCTTTTGTATTCC                                      |
| AtMIR319a-2-II       | GAAGGCTCGAAGTTGACATGACATCAAAGAGAATCAATGA                                     |
| AtMIR319a-2-III      | GAAGACTCGAAGTTGTCATGACTTCACAGGTCGTGATATG                                     |
| AtMIR319a-2-IV       | GAAGTCATGACAACCTTCGAGTCTTCTACATATATATTCCCT                                   |
| AtMIR319a-3-I        | GATATGTCTCCAAAATGTAGCCCTCTCTCTTTTGTATTCC                                     |
| AtMIR319a-3-II       | GAGGGCTACATTTTGGAGACATATCAAAGAGAATCAATGA                                     |
| AtMIR319a-3-III      | GAGGACTACATTTTGCAGACATTTACAGGTCGTGATATG                                      |
| AtMIR319a-3-IV       | GAAATGTCTGCAAAAATGTAGTCTCTACATATATATTCCCT                                    |
| AtMIR319a-4-I        | GATTCTGAGGGAAAATAACGCGGCTCTCTTTTGTATTCCAATT                                  |
| AtMIR319a-4-II       | GCCCGGTTATTTCCCTCAGAATCAAAGAGAATCAATGATCC                                    |
| AtMIR319a-4-III      | GCCACGTTATTTTCGCTCAGATTCACAGGTCGTGATATGAT                                    |
| AtMIR319a-4-IV       | GAATCTGAGCGAAAATAACAGTGGCTACATATATATTCTAAAACG                                |
| AtMIR319a-5-I        | GATGAAGCTATATTGACGTCTTCTCTCTTTTGTATTCCAATT                                   |
| AtMIR319a-5-II       | GAAGGACGTCAATATAGCTTCATCAAAGAGAATCAATGATCC                                   |
| AtMIR319a-5-III      | GAAAGACGTCAATAAAGCTTCTTCACAGGTCGTGATATGAT                                    |
| AtMIR319a-5-IV       | GAAGAAGCTTTATTGACGTCTTCTACATATATATTCTAAAACG                                  |
| AtMIR319a-6-I        | GATCCTAAAATAATCTAAGGCCGCTCTCTTTTGTATTCCAATT                                  |
| AtMIR319a-6-II       | GCGGCCTTAGATTATTTTAGGATCAAAGAGAATCAATGATCC                                   |
| AtMIR319a-6-III      | GCGACCTTAGATTAATTTAGGTTACAGGTCGTGATATGAT                                     |
| AtMIR319a-6-IV       | GAACCTAAATTAATCTAAGGTCGCTACATATATATTCTAAAACG                                 |
| AtMIR319a-F          | CTGCAAGGCGATTAAAGTTGGGTAAC                                                   |
| AtMIR319a-R          | GCGGATAACAATTCACACAGGAACAG                                                   |
| AtMIR390a-F          | CACCTATAGGGGGGAAAAAAGGTAG                                                    |
| AtMIR390a-R          | GAGACTAAAGATGAGATCTAATC                                                      |
| AtMIR390a-1-F        | TGTATTGAAATACTCAACAATGCCGATGATGATCACATTCGTTATCTATTTTTTCGGCATTGTTTAGTATTTCAA  |
| AtMIR390a-1-R        | AATGTTGAAATACTAAACAATGCCGAAAAAATAGATAACGAATGTGATCATCATCGGCATTGTTGAGTATTTCAA  |
| AtMIR390a-2-F        | TGTATGTATGTCAACTTCGAGCCTATGATGATCACATTCGTTATCTATTTTTTAGGCTCGAAGGTGACATGACA   |
| AtMIR390a-2-R        | AATGTGTATGTCACTTCGAGCCTAAAAAATAGATAACGAATGTGATCATCATAGGCTCGAAGGTGACATGACA    |
| AtMIR390a-3-F        | TGTATATGTCTCCAAAATGTAGCCCATGATGATCACATTCGTTATCTATTTTTGGGCTACATTTGGGAGACATA   |
| AtMIR390a-3-R        | AATGTATGTCTCCACAATGTAGCCCAAAAAATAGATAACGAATGTGATCATCATGGGCTACATTTTGGGAGACATA |
| AtMIR390a-4-F        | TGTATTCTGAGGGAAAATAACGCGGATGATGATCACATTCGTTATCTATTTTTTCCGCGTTATTGTCCTCAGAA   |
| AtMIR390a-4-R        | AATGTTCTGAGGGACAATAACGCGGAAAAAATAGATAACGAATGTGATCATCATCCGCGTTATTTCCCTCAGAA   |
| AtMIR390a-5-F        | TGTATGAAGCTATATTGACGTCTTATGATGATCACATTCGTTATCTATTTTTTAAGGACGTCATATAGCTTCA    |
| AtMIR390a-5-R        | AATGTGAAGCTATAGTGACGTCTTAAAAAATAGATAACGAATGTGATCATCATAAGGACGTCATATAGCTTCA    |
| AtMIR390a-6-F        | TGTATCCTAAAATAATCTAAGGCCGATGATGATCACATTCGTTATCTATTTTTTCCGCTTAGAGTATTTTAGGA   |
| AtMIR390a-6-R        | AATGTCTAAAATACTCTAAGGCCGAAAAAATAGATAACGAATGTGATCATCATCGGCCTTAGATTATTTTAGGA   |
| AtMIR390a-B/c-F      | GTTGTTTGTAAAGAGACCATTAGGCACCCAGGCTTACAC                                      |
| AtMIR390a-B/c-R      | GTTGTTAATGTGAGACCGTCGAGGTGCAGACTGGCTGTG                                      |
| AtMIR390a-Ch42-F     | TGTATTAAGTGTACGGAATCCCTATGATGATCACATTCGTTATCTATTTTTTAGGGATTTCCCTTGACACTTAA   |
| AtMIR390a-Ch42-R     | AATGTTAAGTGTCAAGGAAATCCCTAAAAAATAGATAACGAATGTGATCATCATAGGGATTTCCGTGACACTTAA  |
| AtMIR390a-Ft-F       | TGTATTGGTTATAAAGGAAGAGGCCATGATGATCACATTCGTTATCTATTTTTTGGCCTCTCCGTATAACCAA    |
| AtMIR390a-Ft-R       | AATGTTGGTTATAACGGAAGAGGCCAAAAAATAGATAACGAATGTGATCATCATGGCCTCTCCTTTATAACCAA   |
| AtMIR390a-Lfy-F      | TGTATAACAGTGAACGTACTGTGCGATGATGATCACATTCGTTATCTATTTTTTGGCAGTACTTTCACTGTTA    |
| AtMIR390a-Lfy-R      | AATGTAACAGTGAAGTACTGTGCGAAAAAATAGATAACGAATGTGATCATCATGCGACAGTACGTTCACTGTTA   |
| AtMIR390a-Trich-F    | TGTATCCCATTGATACTGCTCGCCATGATGATCACATTCGTTATCTATTTTTTGGCGAGCAGTCTCGAATGGGA   |
| AtMIR390a-Trich-R    | AATGTCCCATTGAGACTGCTCGCCAAAAAATAGATAACGAATGTGATCATCATGGCAGCAGTATCGAATGGGA    |
| AtTAS1c-F            | CACCAAACCTAAACCTAAACCGCTAA                                                   |
| AtTAS1c-R            | ATTTCACTTTACGATGTGGTGTT                                                      |
| AtTAS1c-D3&D4Ft-F    | ATTATTGGTTATAAAGGAAGAGGCCCTTGGTTATAAAGGAAGAGGCC                              |
| AtTAS1c-D3&D4Ft-R    | GTTCCGGCCTTTCCTTATAACCAAGGCCTTTCCTTTATAACCAA                                 |
| AtTAS1c-D3&D4Trich-F | ATTATCCCATTGATACTGCTCGCCTCCCATTCGATACTGCTCGCC                                |
| AtTAS1c-D3&D4Trich-R | GTTCCGGCAGCAGTATCGAATGGGAGGCCGAGCAGTATCGAATGGGA                              |

| Oligonucleotide Name       | Sequence                                           |
|----------------------------|----------------------------------------------------|
| AtTAS1c-D3Ft-D4Trich-F     | ATTATTGGTTATAAAGGAAGAGGCCTCCCATTCGATACTGCTCGCC     |
| AtTAS1c-D3Ft-d4Trich-R     | GTTCGGCGAGCAGTATCGAATGGGAGGCCTCTTCCTTTATAACCAA     |
| AtTAS1c-D3Trich-D4Ft-F     | ATTATCCCATTTCGATACTGCTCGCCTTGGTTATAAAGGAAGAGGCC    |
| AtTAS1c-D3Trich-D4Ft-F     | GTTCGGCCTTTCCTTTATAACCAAAGGCGAGCAGTATCGAATGGGA     |
| BsaI-AtMIR390a-3'-F        | ATCTGTAAGAGACCGTTGTTGGTCTCACATTGGCTCTTCTACTACAATG  |
| BsaI-AtMIR390a-5'-R        | GAGCCAATGTGAGACCAACAACGGTCTCTTACAGATTCTTCTCTACTTTG |
| BsaI-AtTAS1c-3'-F          | AAAATTAAGAGACCGTTGTTGGTCTCAGAAGTAAAGACATTGGACAT    |
| BsaI-AtTAS1c-5'-R          | TTCTAGTTCTGAGACCAACAACGGTCTCTTAATTTTCTAAGATCCACCGA |
| Probe-amiR-1               | CGGCATTGTTGAGTATTTCAA                              |
| Probe-amiR-2               | AGGCTCGAAGTTGACATGACA                              |
| Probe-amiR-3               | GGGCTACATTTTGAGACATA                               |
| Probe-amiR-4               | CCGCGTTATTTCCCTCAGAA                               |
| Probe-amiR-5               | AAGGACGTCAATATAGCTTCA                              |
| Probe-amiR-6               | CGGCCTTAGATTATTTTAGGA                              |
| Probe-amiR-Ch42            | AGGGATTTCCGTGACACTTAA                              |
| Probe-amiR-Lfy             | GCGACAGTACGTTCACTGTTA                              |
| Probe-amiR/syn-tasiR-Ft    | GGCCTCTTCCTTTATAACCAA                              |
| Probe-amiR/syn-tasiR-Trich | GGCGAGCAGTATCGAATGGGA                              |
| Probe-U6                   | AGGGGCCATGCTAATCTTCTC                              |
| qAtACT2-F                  | AAAAATGGCTGAGGCTGATGA                              |
| qAtACT2-R                  | GAAAAACAGCCCTGGGAGC                                |
| qAtCBP20-F                 | AGCTGCGCCAACGAATTATG                               |
| qAtCBP20-R                 | TCCATGGCGATTTTGTCTC                                |
| qAtCH42-CS-F               | CATGCACAAGTAGGGACGGTT                              |
| qAtCH42-CS-R               | GTCACGGAAATCCTTTGGGTT                              |
| qAtCPC-CS-F                | TCAATGGGAAGCTGTGAAGA                               |
| qAtCPC-CS-R                | GCGATCAACTCCCACCTGTC                               |
| qAtETC2-CS-F               | GCGGTCCCAGTCTTAGGCA                                |
| qAtETC2-CS-R               | TTCGATGCTACTCACTTCTCAGAGT                          |
| qAtFT-F                    | TGGAACAACCTTTGGCAATG                               |
| qAtFT-R                    | CGACACGATGAATTCCTGCA                               |
| qAtLFY-F                   | CCAAGGTGACGAACCAAGTATTC                            |
| qAtLFY-R                   | AGGCAGTGGAGAGCGTAACAG                              |
| qAtSAND-F                  | CTCAAAGATTGCAGGGTACGC                              |
| qAtSAND-R                  | TCTTCAACACGCATTCCACCT                              |
| qAtTRY-CS-F                | ACACAAAATCGCCCTCCATG                               |
| qAtTRY-CS-R                | TCAAATCCCACCTATCACCGA                              |
| qAtUBQ10-F                 | CGCCTGCAAAGTGACTCGA                                |
| qAtUBQ10-R                 | CCAACAGCTCAACACTTTCCGC                             |



**Supplemental Table SV.** Sequences and predicted targets for all the amiRNA and syn-tasiRNA sequences used in this study.

| Cassette Name                 | small RNA name         | small RNA class    | Foldback/ Transcript | small RNA sequence (5'→3') | Reference                 | Predicted target(s)     |
|-------------------------------|------------------------|--------------------|----------------------|----------------------------|---------------------------|-------------------------|
| <i>AtMIR319-1</i>             | <i>amiR-1</i>          | <i>amiRNA</i>      | <i>AtMIR319a</i>     | UUGAAAUACUCAACAAUGCCG      | This work                 | <i>AGO2, AGO3</i>       |
| <i>AtMIR319-2</i>             | <i>amiR-2</i>          | <i>amiRNA</i>      | <i>AtMIR319a</i>     | UGUCAUGUCAACUUCGAGCCU      | This work                 | <i>RDR3, RDR4, RDR5</i> |
| <i>AtMIR319-3</i>             | <i>amiR-3</i>          | <i>amiRNA</i>      | <i>AtMIR319a</i>     | UAUGUCUCCAAAAUGUAGCCC      | This work                 | <i>RDR3, RDR4, RDR5</i> |
| <i>AtMIR319-4</i>             | <i>amiR-4</i>          | <i>amiRNA</i>      | <i>AtMIR319a-21</i>  | UUCUGAGGGAAAAUAACGCGG      | This work                 | <i>RDR6</i>             |
| <i>AtMIR319-5</i>             | <i>amiR-5</i>          | <i>amiRNA</i>      | <i>AtMIR319a-21</i>  | UGAAGCUAUUUGACGUCCUU       | This work                 | <i>RDR6</i>             |
| <i>AtMIR319-6</i>             | <i>amiR-6</i>          | <i>amiRNA</i>      | <i>AtMIR319a-21</i>  | UCCUAAAAUAAUCUAAGGCCG      | This work                 | <i>RDR6</i>             |
| <i>AtMIR390a-1</i>            | <i>amiR-1</i>          | <i>amiRNA</i>      | <i>AtMIR390a</i>     | UUGAAAUACUCAACAAUGCCG      | This work                 | <i>AGO2, AGO3,</i>      |
| <i>AtMIR390a-2</i>            | <i>amiR-2</i>          | <i>amiRNA</i>      | <i>AtMIR390a</i>     | UGUCAUGUCAACUUCGAGCCU      | This work                 | <i>RDR3, RDR4, RDR5</i> |
| <i>AtMIR390a-3</i>            | <i>amiR-3</i>          | <i>amiRNA</i>      | <i>AtMIR390a</i>     | UAUGUCUCCAAAAUGUAGCCC      | This work                 | <i>RDR3, RDR4, RDR5</i> |
| <i>AtMIR390a-4</i>            | <i>amiR-4</i>          | <i>amiRNA</i>      | <i>AtMIR390a</i>     | UUCUGAGGGAAAAUAACGCGG      | This work                 | <i>RDR6</i>             |
| <i>AtMIR390a-5</i>            | <i>amiR-5</i>          | <i>amiRNA</i>      | <i>AtMIR390a</i>     | UGAAGCUAUUUGACGUCCUU       | This work                 | <i>RDR6</i>             |
| <i>AtMIR390a-6</i>            | <i>amiR-6</i>          | <i>amiRNA</i>      | <i>AtMIR390a</i>     | UCCUAAAAUAAUCUAAGGCCG      | This work                 | <i>RDR6</i>             |
| <i>AtMIR390a-Ft</i>           | <i>amiR-Ft</i>         | <i>amiRNA</i>      | <i>AtMIR390a</i>     | UUGGUUAUAAAGGAAGAGGCC      | Schwabb et al., 2006      | <i>FT</i>               |
| <i>AtMIR390a-Lfy</i>          | <i>amiR-Lfy</i>        | <i>amiRNA</i>      | <i>AtMIR390a</i>     | UAACAGUGAACGUACUGUCGC      | Schwabb et al., 2006      | <i>LFY</i>              |
| <i>AtMIR390a-Ch42</i>         | <i>amiR-Ch42</i>       | <i>amiRNA</i>      | <i>AtMIR390a</i>     | UUAAGUGUCACGAAAUCCCU       | Felippes and Weigel, 2009 | <i>CH42</i>             |
| <i>AtMIR390a-Trich</i>        | <i>amiR-Trich</i>      | <i>amiRNA</i>      | <i>AtMIR390a</i>     | UCCCAUUCGAUACUGCUCGCC      | Schwabb et al., 2006      | <i>TRY, CPC, ETC2</i>   |
| <i>AtTAS1c-d3&amp;d4Trich</i> | <i>syn-tasiR-Trich</i> | <i>syn-tasiRNA</i> | <i>AtTAS1c</i>       | UCCCAUUCGAUACUGCUCGCC      | Schwabb et al., 2006      | <i>TRY, CPC, ETC2</i>   |
| <i>AtTAS1c-d3&amp;d4Ft</i>    | <i>syn-tasiR-Ft</i>    | <i>syn-tasiRNA</i> | <i>AtTAS1c</i>       | UUGGUUAUAAAGGAAGAGGCC      | Schwabb et al., 2006      | <i>FT</i>               |
| <i>AtTAS1c-d3Trich-d4Ft</i>   | <i>syn-tasiR-Trich</i> | <i>syn-tasiRNA</i> | <i>AtTAS1c</i>       | UCCCAUUCGAUACUGCUCGCC      | Schwabb et al., 2006      | <i>TRY, CPC, ETC2</i>   |
|                               | <i>syn-tasiR-Ft</i>    | <i>syn-tasiRNA</i> | <i>AtTAS1c</i>       | UUGGUUAUAAAGGAAGAGGCC      | Schwabb et al., 2006      | <i>FT</i>               |
| <i>AtTAS1c-d3Ft-d4Trich</i>   | <i>syn-tasiR-Ft</i>    | <i>syn-tasiRNA</i> | <i>AtTAS1c</i>       | UUGGUUAUAAAGGAAGAGGCC      | Schwabb et al., 2006      | <i>FT</i>               |
|                               | <i>syn-tasiR-Trich</i> | <i>syn-tasiRNA</i> | <i>AtTAS1c</i>       | UCCCAUUCGAUACUGCUCGCC      | Schwabb et al., 2006      | <i>TRY, CPC, ETC2</i>   |

**Supplemental Table SVI.** Summary of high-throughput small RNA libraries from *A. thaliana* transgenic lines

| Sample ID | Construct                       | 3'PCR primer | Barcode Sequence | Adaptor-parsed reads |
|-----------|---------------------------------|--------------|------------------|----------------------|
| 1         | <i>35S:AtMIR390a-Ft</i>         | i3           | CAGATG           | 31,046,134           |
| 2         | <i>35S:AtMIR390a-Lfy</i>        | i5           | TTACCA           | 33,795,367           |
| 3         | <i>35S:AtMIR390a-Ch42</i>       | i9           | GCCAAT           | 19,417,667           |
| 4         | <i>35S:AtMIR390a-Trich</i>      | i1           | CGATGT           | 30,544,221           |
| 5         | <i>35S:GUS</i>                  | i1           | CGATGT           | 17,503,977           |
| 6         | <i>35S:AtTAS1c-D3Trich-D4Ft</i> | i4           | TACGTT           | 25,061,705           |
| 7         | <i>35S:AtTAS1c-D3Ft-D4Trich</i> | i5           | TTACCA           | 25,777,455           |

**Supplemental Table SVII.**  
miRbase Locus Identifiers of the Arabidopsis conserved *MIRNA* precursors used in this study.

| <i>MIRNA</i> precursor | Locus Identifier          |
|------------------------|---------------------------|
| <i>Ath-MIR156a</i>     | <a href="#">MI0000178</a> |
| <i>Ath-MIR156b</i>     | <a href="#">MI0000179</a> |
| <i>Ath-MIR156c</i>     | <a href="#">MI0000180</a> |
| <i>Ath-MIR156d</i>     | <a href="#">MI0000181</a> |
| <i>Ath-MIR156e</i>     | <a href="#">MI0000182</a> |
| <i>Ath-MIR156f</i>     | <a href="#">MI0000183</a> |
| <i>Ath-MIR156g</i>     | <a href="#">MI0001082</a> |
| <i>Ath-MIR156h</i>     | <a href="#">MI0001083</a> |
| <i>Ath-MIR157a</i>     | <a href="#">MI0000184</a> |
| <i>Ath-MIR157b</i>     | <a href="#">MI0000185</a> |
| <i>Ath-MIR157c</i>     | <a href="#">MI0000186</a> |
| <i>Ath-MIR157d</i>     | <a href="#">MI0000187</a> |
| <i>Ath-MIR159a</i>     | <a href="#">MI0000189</a> |
| <i>Ath-MIR159b</i>     | <a href="#">MI0000218</a> |
| <i>Ath-MIR159c</i>     | <a href="#">MI0001085</a> |
| <i>Ath-MIR160a</i>     | <a href="#">MI0000190</a> |
| <i>Ath-MIR160b</i>     | <a href="#">MI0000191</a> |
| <i>Ath-MIR160c</i>     | <a href="#">MI0000192</a> |
| <i>Ath-MIR162a</i>     | <a href="#">MI0000194</a> |
| <i>Ath-MIR162b</i>     | <a href="#">MI0000195</a> |
| <i>Ath-MIR164a</i>     | <a href="#">MI0000197</a> |
| <i>Ath-MIR164b</i>     | <a href="#">MI0000198</a> |
| <i>Ath-MIR164c</i>     | <a href="#">MI0001087</a> |
| <i>Ath-MIR165a</i>     | <a href="#">MI0000199</a> |
| <i>Ath-MIR165b</i>     | <a href="#">MI0000200</a> |
| <i>Ath-MIR166a</i>     | <a href="#">MI0000201</a> |
| <i>Ath-MIR166b</i>     | <a href="#">MI0000202</a> |
| <i>Ath-MIR166c</i>     | <a href="#">MI0000203</a> |
| <i>Ath-MIR166d</i>     | <a href="#">MI0000204</a> |
| <i>Ath-MIR166e</i>     | <a href="#">MI0000205</a> |
| <i>Ath-MIR166f</i>     | <a href="#">MI0000206</a> |
| <i>Ath-MIR166g</i>     | <a href="#">MI0000207</a> |
| <i>Ath-MIR167a</i>     | <a href="#">MI0000208</a> |
| <i>Ath-MIR167b</i>     | <a href="#">MI0000209</a> |
| <i>Ath-MIR167c</i>     | <a href="#">MI0001088</a> |
| <i>Ath-MIR167d</i>     | <a href="#">MI0000975</a> |
| <i>Ath-MIR168a</i>     | <a href="#">MI0000210</a> |
| <i>Ath-MIR168b</i>     | <a href="#">MI0000211</a> |
| <i>Ath-MIR169a</i>     | <a href="#">MI0000212</a> |
| <i>Ath-MIR169b</i>     | <a href="#">MI0000976</a> |
| <i>Ath-MIR169c</i>     | <a href="#">MI0000977</a> |
| <i>Ath-MIR169d</i>     | <a href="#">MI0000978</a> |
| <i>Ath-MIR169e</i>     | <a href="#">MI0000979</a> |
| <i>Ath-MIR169f</i>     | <a href="#">MI0000980</a> |
| <i>Ath-MIR169g</i>     | <a href="#">MI0000981</a> |
| <i>Ath-MIR169h</i>     | <a href="#">MI0000982</a> |
| <i>Ath-MIR169i</i>     | <a href="#">MI0000983</a> |
| <i>Ath-MIR169j</i>     | <a href="#">MI0000984</a> |
| <i>Ath-MIR169k</i>     | <a href="#">MI0000985</a> |
| <i>Ath-MIR169l</i>     | <a href="#">MI0000986</a> |
| <i>Ath-MIR169m</i>     | <a href="#">MI0000987</a> |
| <i>Ath-MIR169n</i>     | <a href="#">MI0000988</a> |
| <i>Ath-MIR170</i>      | <a href="#">MI0000213</a> |

| MIRNA precursor    | Locus Identifier          |
|--------------------|---------------------------|
| <i>Ath-MIR171a</i> | <a href="#">MI0000214</a> |
| <i>Ath-MIR171b</i> | <a href="#">MI0000989</a> |
| <i>Ath-MIR171c</i> | <a href="#">MI0000990</a> |
| <i>Ath-MIR172a</i> | <a href="#">MI0000215</a> |
| <i>Ath-MIR172b</i> | <a href="#">MI0000216</a> |
| <i>Ath-MIR172c</i> | <a href="#">MI0000991</a> |
| <i>Ath-MIR172d</i> | <a href="#">MI0000992</a> |
| <i>Ath-MIR172e</i> | <a href="#">MI0001089</a> |
| <i>Ath-MIR173</i>  | <a href="#">MI0000217</a> |
| <i>Ath-MIR319a</i> | <a href="#">MI0000544</a> |
| <i>Ath-MIR319b</i> | <a href="#">MI0000545</a> |
| <i>Ath-MIR319c</i> | <a href="#">MI0001086</a> |
| <i>Ath-MIR390a</i> | <a href="#">MI0001000</a> |
| <i>Ath-MIR390b</i> | <a href="#">MI0001001</a> |
| <i>Ath-MIR391</i>  | <a href="#">MI0001002</a> |
| <i>Ath-MIR393a</i> | <a href="#">MI0001003</a> |
| <i>Ath-MIR393b</i> | <a href="#">MI0001004</a> |
| <i>Ath-MIR394a</i> | <a href="#">MI0001005</a> |
| <i>Ath-MIR394b</i> | <a href="#">MI0001006</a> |
| <i>Ath-MIR395a</i> | <a href="#">MI0001007</a> |
| <i>Ath-MIR395b</i> | <a href="#">MI0001008</a> |
| <i>Ath-MIR395c</i> | <a href="#">MI0001009</a> |
| <i>Ath-MIR395d</i> | <a href="#">MI0001010</a> |
| <i>Ath-MIR395e</i> | <a href="#">MI0001011</a> |
| <i>Ath-MIR395f</i> | <a href="#">MI0001012</a> |
| <i>Ath-MIR396a</i> | <a href="#">MI0001013</a> |
| <i>Ath-MIR396b</i> | <a href="#">MI0001014</a> |
| <i>Ath-MIR397a</i> | <a href="#">MI0001015</a> |
| <i>Ath-MIR397b</i> | <a href="#">MI0001016</a> |
| <i>Ath-MIR398a</i> | <a href="#">MI0001017</a> |
| <i>Ath-MIR398b</i> | <a href="#">MI0001018</a> |
| <i>Ath-MIR398c</i> | <a href="#">MI0001019</a> |
| <i>Ath-MIR399a</i> | <a href="#">MI0001020</a> |
| <i>Ath-MIR399b</i> | <a href="#">MI0001021</a> |
| <i>Ath-MIR399c</i> | <a href="#">MI0001022</a> |
| <i>Ath-MIR399d</i> | <a href="#">MI0001023</a> |
| <i>Ath-MIR399e</i> | <a href="#">MI0001024</a> |
| <i>Ath-MIR399f</i> | <a href="#">MI0001025</a> |
| <i>Ath-MIR408</i>  | <a href="#">MI0001080</a> |
| <i>Ath-MIR827</i>  | <a href="#">MI0005383</a> |

**Supplemental Table SVIII.** miRBase Locus Identifiers of those plant *MIRNA* precursors previously used for expressing amiRNAs.

| <i>MIRNA</i> precursor | Plant Species                    | Locus Identifier          | Original Reference     |
|------------------------|----------------------------------|---------------------------|------------------------|
| <i>Ath-MIR159a</i>     | <i>Arabidopsis thaliana</i>      | <a href="#">MI0000189</a> | Niu et al. 2006        |
| <i>Ath-MIR159b</i>     | <i>Arabidopsis thaliana</i>      | <a href="#">MI0000218</a> | Eamens et al. 2011     |
| <i>Ath-MIR164a</i>     | <i>Arabidopsis thaliana</i>      | <a href="#">MI0000197</a> | Alvarez et al. 2006    |
| <i>Ath-MIR164b</i>     | <i>Arabidopsis thaliana</i>      | <a href="#">MI0000198</a> | Alvarez et al. 2006    |
| <i>Ath-MIR169d</i>     | <i>Arabidopsis thaliana</i>      | <a href="#">MI0000978</a> | Liu et al. 2010        |
| <i>Ath-MIR171a</i>     | <i>Arabidopsis thaliana</i>      | <a href="#">MI0000214</a> | Qu et al. 2007         |
| <i>Ath-MIR172a</i>     | <i>Arabidopsis thaliana</i>      | <a href="#">MI0000215</a> | Schwab et al. 2006     |
| <i>Ath-MIR319a</i>     | <i>Arabidopsis thaliana</i>      | <a href="#">MI0000544</a> | Schwab et al. 2006     |
| <i>Ath-MIR390a</i>     | <i>Arabidopsis thaliana</i>      | <a href="#">MI0001000</a> | Montgomery et al. 2008 |
| <i>Ath-MIR395a</i>     | <i>Arabidopsis thaliana</i>      | <a href="#">MI0001007</a> | Liang et al. 2012      |
| <i>Cre-MIR1157</i>     | <i>Chlamydomonas reinhardtii</i> | <a href="#">MI0006219</a> | Zhao et al. 2009       |
| <i>Cre-MIR1162</i>     | <i>Chlamydomonas reinhardtii</i> | <a href="#">MI0006223</a> | Molnar et al. 2009     |
| <i>Ghb-MIR169a</i>     | <i>Gossypium herbaceum</i>       | <a href="#">MI0005646</a> | Ali et al. 2013        |
| <i>Osa-MIR528</i>      | <i>Oryza sativa</i>              | <a href="#">MI0003201</a> | Warthmann et al. 2008  |
| <i>Ptc-MIR408</i>      | <i>Populus trichocarpa</i>       | <a href="#">MI0002352</a> | Shi et al. 2010        |
| <i>Sly-MIR159</i>      | <i>Solanum lycopersicum</i>      | <a href="#">MI0009974</a> | Vu et al. 2013         |
| <i>Sly-MIR168a</i>     | <i>Solanum lycopersicum</i>      | <a href="#">MI0024352</a> | Vu et al. 2013         |

## **Supplemental Protocol S1**

Protocol to design and clone amiRNAs or syn-tasiRNAs in *BsaI/ccdB*-based ('B/c') vectors containing *AtMIR390a* or *AtTAS1c* precursors, respectively.

### **INDEX**

#### **1. Selection of the amiRNA or syn-tasiRNA(s) sequence(s)**

#### **2. Design of amiRNA or syn-tasiRNA oligonucleotides**

##### **2.1 Design of amiRNA oligonucleotides**

2.1.1 Sequence of the *AtMIR390a* cassette containing the amiRNA

2.1.2. Sequence of the amiRNA oligonucleotides

##### **2.2 Design of syn-tasiRNA oligonucleotides**

2.2.1 Sequence of the *AtTAS1c* cassette containing the syn-tasiRNA(s)

2.2.2. Sequence of the syn-tasiRNA oligonucleotides

#### **3. Cloning of the amiRNA/syn-tasiRNA sequences in *BsaI/ccdB* (B/c) vectors**

3.1 Oligonucleotide annealing

3.2. Digestion-ligation reaction

3.3. *E.coli* transformation and analysis of transformants

## 1. Selection of the amiRNA or syn-tasiRNA(s) sequence(s)

A link to a web tool for automated design of the amiRNA or syn-tasiRNA sequence(s) will be available at <http://p-sams.carringtonlab.org/>

## 2. Design of amiRNA or syn-tasiRNA oligonucleotides

A link to a web tool for automated design of the amiRNA or syn-tasiRNA oligonucleotide sequences will be available at <http://p-sams.carringtonlab.org/>

### 2.1 Design of amiRNA oligonucleotides

#### 2.1.1 Sequence of the *AtMIR390a* cassette containing the amiRNA

The following FASTA sequence includes the amiRNA sequence inserted in the *AtMIR390a* precursor sequence:

#### >amiRNA in *AtMIR390a* precursor

```
TATAGGGGGGAAAAAAGGTAGTCATCAGATATATATTTTTGGTAAGAAAATATAGAAATGAATA
ATTTACGTTTAACGAAGAGGAGATGACGTGTGTTCCCTTCGAACCCGAGTTTTGTTTCGTCTATA
AATAGCACCTTCTCTTCTCCTTCTCCTCACTTCCATCTTTTTAGCTTCACTATCTCTCTATAA
TCGGTTTTATCTTTCTCTAAGTCACAACCCAAAAAACAAGTAGAGAAGAATCTGTAX1X2X3X4
X5X6X7X8X9X10X11X12X13X14X15X16X17X18X19X20X21ATGATGATCACATTCGTTATCTATTTTTT
TXX1X2X1X2X3X4X5X6X7X8X9X10X11X12X13X14X15X16X17X18X19CATTGGCTCTTCTTACTACAAT
GAAAAAGGCCGAGGCAAAACGCCTAAAATCACCTGAGAATCAATTCCTTTTTACTGTCCATTTAA
GCTATCTTTTATAAACGTGTCTTATTTTCTATCTCTTTTGTTTAACTAAGAACTATAGTATT
TTGTCTAAAAACAAAACATGAAAGAACAGATTAGATCTCATCTTTAGTCTC
```

Where:

- X is a DNA base of the amiRNA sequence, and the subscript number is the base position in the amiRNA 21-mer
- X is a DNA base of the amiRNA\* sequence, and the subscript number is the base position in the amiRNA\* 21-mer
- X is a DNA base of the *AtMIR390a* foldback
- X is a DNA base of the *AtMIR390a* foldback included in the oligonucleotides required to clone the amiRNA insert in B/c vectors
- X is a DNA base of the *AtMIR390a* foldback that may be modified to preserve the authentic *AtMIR390a* duplex structure

-X is a DNA base of the *AtMIR390a* precursor

In the sequence above:

-Insert the amiRNA sequence where you see

**X<sub>1</sub>X<sub>2</sub>X<sub>3</sub>X<sub>4</sub>X<sub>5</sub>X<sub>6</sub>X<sub>7</sub>X<sub>8</sub>X<sub>9</sub>X<sub>10</sub>X<sub>11</sub>X<sub>12</sub>X<sub>13</sub>X<sub>14</sub>X<sub>15</sub>X<sub>16</sub>X<sub>17</sub>X<sub>18</sub>X<sub>19</sub>X<sub>20</sub>X<sub>21</sub>**

-Insert the amiRNA\* sequence that has to verify the following base-pairing:

|                       |                       |                       |                       |                       |                       |                       |                       |                       |                       |                       |                       |                       |                       |                       |                       |                       |                       |                       |                       |                       |
|-----------------------|-----------------------|-----------------------|-----------------------|-----------------------|-----------------------|-----------------------|-----------------------|-----------------------|-----------------------|-----------------------|-----------------------|-----------------------|-----------------------|-----------------------|-----------------------|-----------------------|-----------------------|-----------------------|-----------------------|-----------------------|
| <b>X<sub>1</sub></b>  | <b>X<sub>2</sub></b>  | <b>X<sub>3</sub></b>  | <b>X<sub>4</sub></b>  | <b>X<sub>5</sub></b>  | <b>X<sub>6</sub></b>  | <b>X<sub>7</sub></b>  | <b>X<sub>8</sub></b>  | <b>X<sub>9</sub></b>  | <b>X<sub>10</sub></b> | <b>X<sub>11</sub></b> | <b>X<sub>12</sub></b> | <b>X<sub>13</sub></b> | <b>X<sub>14</sub></b> | <b>X<sub>15</sub></b> | <b>X<sub>16</sub></b> | <b>X<sub>17</sub></b> | <b>X<sub>18</sub></b> | <b>X<sub>19</sub></b> | <b>X<sub>20</sub></b> | <b>X<sub>21</sub></b> |
|                       |                       |                       |                       |                       |                       |                       |                       |                       |                       |                       |                       |                       |                       |                       |                       |                       |                       |                       |                       |                       |
| <b>X<sub>19</sub></b> | <b>X<sub>18</sub></b> | <b>X<sub>17</sub></b> | <b>X<sub>16</sub></b> | <b>X<sub>15</sub></b> | <b>X<sub>14</sub></b> | <b>X<sub>13</sub></b> | <b>X<sub>12</sub></b> | <b>X<sub>11</sub></b> | <b>X<sub>10</sub></b> | <b>X<sub>9</sub></b>  | <b>X<sub>8</sub></b>  | <b>X<sub>7</sub></b>  | <b>X<sub>6</sub></b>  | <b>X<sub>5</sub></b>  | <b>X<sub>4</sub></b>  | <b>X<sub>3</sub></b>  | <b>X<sub>2</sub></b>  | <b>X<sub>1</sub></b>  | <b>X<sub>2</sub></b>  | <b>X<sub>1</sub></b>  |

Note that:

-In general, **X<sub>1</sub>=T** for amiRNA association with AGO1. In this case, **X<sub>19</sub>=A**

-Bases **X<sub>11</sub>** and **X<sub>9</sub>** DO NOT base-pair to preserve the central bulge of the authentic *AtMIR390a* duplex. The following base-pair rule applies:

-If **X<sub>11</sub>=G**, then **X<sub>9</sub>=A**

-If **X<sub>11</sub>=C**, then **X<sub>9</sub>=T**

-If **X<sub>11</sub>=A**, then **X<sub>9</sub>=G**

-If **X<sub>11</sub>=U**, then **X<sub>9</sub>=C**

### 2.1.2. Sequence of the amiRNA oligonucleotides

The sequences of the two amiRNA oligonucleotides are:

-Forward oligonucleotide (75 b),

**TGTAX<sub>1</sub>X<sub>2</sub>X<sub>3</sub>X<sub>4</sub>X<sub>5</sub>X<sub>6</sub>X<sub>7</sub>X<sub>8</sub>X<sub>9</sub>X<sub>10</sub>X<sub>11</sub>X<sub>12</sub>X<sub>13</sub>X<sub>14</sub>X<sub>15</sub>X<sub>16</sub>X<sub>17</sub>X<sub>18</sub>X<sub>19</sub>X<sub>20</sub>X<sub>21</sub>ATGATGATCACA**  
**TTCGTTATCTATTTTTT**X<sub>1</sub>X<sub>2</sub>X<sub>1</sub>X<sub>2</sub>X<sub>3</sub>X<sub>4</sub>X<sub>5</sub>X<sub>6</sub>X<sub>7</sub>X<sub>8</sub>X<sub>9</sub>X<sub>10</sub>X<sub>11</sub>X<sub>12</sub>X<sub>13</sub>X<sub>14</sub>X<sub>15</sub>X<sub>16</sub>X<sub>17</sub>X<sub>18</sub>X<sub>19</sub>****

-Reverse oligonucleotide (75 b),

**AATGY<sub>19</sub>Y<sub>18</sub>Y<sub>17</sub>Y<sub>16</sub>Y<sub>15</sub>Y<sub>14</sub>Y<sub>13</sub>Y<sub>12</sub>Y<sub>11</sub>Y<sub>10</sub>Y<sub>9</sub>Y<sub>8</sub>Y<sub>7</sub>Y<sub>6</sub>Y<sub>5</sub>Y<sub>4</sub>Y<sub>3</sub>Y<sub>2</sub>Y<sub>1</sub>**Y<sub>2</sub>Y<sub>1</sub>AAAAAATGATAACG**  
**AATGTGATCATCATY<sub>21</sub>Y<sub>20</sub>Y<sub>19</sub>Y<sub>18</sub>Y<sub>17</sub>Y<sub>16</sub>Y<sub>15</sub>Y<sub>14</sub>Y<sub>13</sub>Y<sub>12</sub>Y<sub>11</sub>Y<sub>10</sub>Y<sub>9</sub>Y<sub>8</sub>Y<sub>7</sub>Y<sub>6</sub>Y<sub>5</sub>Y<sub>4</sub>Y<sub>3</sub>Y<sub>2</sub>Y<sub>1</sub>****

Where:

-**X<sub>1</sub>X<sub>2</sub>X<sub>3</sub>X<sub>4</sub>X<sub>5</sub>X<sub>6</sub>X<sub>7</sub>X<sub>8</sub>X<sub>9</sub>X<sub>10</sub>X<sub>11</sub>X<sub>12</sub>X<sub>13</sub>X<sub>14</sub>X<sub>15</sub>X<sub>16</sub>X<sub>17</sub>X<sub>18</sub>X<sub>19</sub>X<sub>20</sub>X<sub>21</sub>**=amiRNA  
sequence

-**X<sub>1</sub>X<sub>2</sub>X<sub>3</sub>X<sub>4</sub>X<sub>5</sub>X<sub>6</sub>X<sub>7</sub>X<sub>8</sub>X<sub>9</sub>X<sub>10</sub>X<sub>11</sub>X<sub>12</sub>X<sub>13</sub>X<sub>14</sub>X<sub>15</sub>X<sub>16</sub>X<sub>17</sub>X<sub>18</sub>X<sub>19</sub>**=partial amiRNA\*  
sequence

-**Y<sub>21</sub>Y<sub>20</sub>Y<sub>19</sub>Y<sub>18</sub>Y<sub>17</sub>Y<sub>16</sub>Y<sub>15</sub>Y<sub>14</sub>Y<sub>13</sub>Y<sub>12</sub>Y<sub>11</sub>Y<sub>10</sub>Y<sub>9</sub>Y<sub>8</sub>Y<sub>7</sub>Y<sub>6</sub>Y<sub>5</sub>Y<sub>4</sub>Y<sub>3</sub>Y<sub>2</sub>Y<sub>1</sub>**=amiRNA  
reverse-complement sequence



-**TGY<sub>19</sub>Y<sub>18</sub>Y<sub>17</sub>Y<sub>16</sub>Y<sub>15</sub>Y<sub>14</sub>Y<sub>13</sub>Y<sub>12</sub>Y<sub>11</sub>Y<sub>10</sub>Y<sub>9</sub>Y<sub>8</sub>Y<sub>7</sub>Y<sub>6</sub>Y<sub>5</sub>Y<sub>4</sub>Y<sub>3</sub>Y<sub>2</sub>Y<sub>1</sub>**=amiRNA\* reverse-complement sequence

-**X<sub>1</sub>X<sub>2</sub>** = *AtMIR390a* sequence that may be modified to preserve authentic *AtMIR390a* duplex structure.

-**Y<sub>2</sub>Y<sub>1</sub>** = reverse-complement of **X<sub>1</sub>X<sub>2</sub>**

**Example:**

The sequences of the two oligonucleotides to clone the amiRNA ‘amiR-Trich’

(**TCCATTTCGATACTGCTCGCC**) are:

-Sense oligonucleotide (75 b),

**TGTATCCCATTCGATACTGCTCGCCATGATGATCACATTCGTTATCTATTTTTTGGCG  
AGCAGTCTCGAATGGGA**

-Antisense oligonucleotide (75 b),

**AA**TGTCCCATTCGAGACTGCTCGCC**AAAAATAGATAACGAATGTGATCATCAT**GGCG  
AGCAGTATCGAATGGGA****

**Note:** the 75 b long oligonucleotides can be ordered PAGE-purified, although oligonucleotides of ‘Standard Desalting’ quality work well.

**2.2 Design of syn-tasiRNA oligonucleotides**

2.2.1 Sequence of the *AtTAS1c* cassette containing the syntasiRNA(s)

The following FASTA sequence includes two syn-tasiRNA sequences inserted in the *AtTAS1c* precursor sequence:

**>syn-tasiRNA-1 and syn-tasiRNA-2 in *AtTAS1c***

AAACCTAAACCTAAACGGCTAAGCCCGACGTCAAATACCAAAAAGAGAAAACAAGAGCGCCGT  
CAAGCTCTGCAAATACGATCTGTAAGTCCATCTTAACACAAAAGTGAGATGGGTTCTTAGATCA  
TGTTCGCCGTTAGATCGAGTCATGGTCTTGTCTCATAGAAAGGTACTTTTCGTTTACTTCTTTT  
GAGTATCGAGTAGAGCGTCGTCTATAGTTAGTTTGAGATTGCGTTTGTGAGAAGTTAGGTTCAA  
TGTCCCGGTCCAATTTTCACCAGCCATGTGTCAGTTTCGTTCCCTCCCGTCCTCTTTGATT  
TCGTTGGGTTACGGATGTTTTTCGAGATGAAACAGCATTGTTTTGTTGTGATTTTTCTCTACAAG  
CGAATAGACCATTTATCGGTGGATCTTAGAAA**ATTAX<sub>1</sub>X<sub>2</sub>X<sub>3</sub>X<sub>4</sub>X<sub>5</sub>X<sub>6</sub>X<sub>7</sub>X<sub>8</sub>X<sub>9</sub>X<sub>10</sub>X<sub>11</sub>X<sub>12</sub>X<sub>13</sub>X<sub>14</sub>X<sub>15</sub>  
X<sub>16</sub>X<sub>17</sub>X<sub>18</sub>X<sub>19</sub>X<sub>20</sub>X<sub>21</sub>X<sub>1</sub>X<sub>2</sub>X<sub>3</sub>X<sub>4</sub>X<sub>5</sub>X<sub>6</sub>X<sub>7</sub>X<sub>8</sub>X<sub>9</sub>X<sub>10</sub>X<sub>11</sub>X<sub>12</sub>X<sub>13</sub>X<sub>14</sub>X<sub>15</sub>X<sub>16</sub>X<sub>17</sub>X<sub>18</sub>X<sub>19</sub>X<sub>20</sub>X<sub>21</sub>GAAC**TAGA  
AAAGACATTGGACATATTCCAGGATATGCAAAAAGAAAACAATGAATATTGTTTTGAATGTGTTCT  
AAGTAAATGAGATTTTCAAGTCGTCTAAAGAACAGTTGCTAATACAGTTACTTATTTCAATAAA

TAAATTGGTTCTAATAATACAAAACATATTCGAGGATATGCAGAAAAAAGATGTTTGTATTTT  
GAAAAGCTTGAGTAGTTTCTCTCCGAGGTGTAGCGAAGAAGCATCATCTACTTTGTAATGTAAT  
TTTCTTTATGTTTTCACTTTGTAATTTTATTTGTGTTAATGTACCATGGCCGATATCGGTTTTA  
TTGAAAGAAAAATTTATGTTACTTCTGTTTTGGCTTTGCAATCAGTTATGCTAGTTTTCTTATAC  
CCTTTCGTAAGCTTCCTAAGGAATCGTTCATTGATTTCCACTGCTTCATTGTATATTTAAACTT  
TACAACGTATCGACCATCATATAATTCTGGGTCAAGAGATGAAAATAGAACCACCATCGTAA  
AGTGAAAT

Where:

- X** is a DNA base of the syn-tasiRNA-1 sequence, and the subscript number is the base position in the syn-tasiRNA-1 21-mer
- X** is a DNA base of the syn-tasiRNA-2 sequence, and the subscript number is the base position in the syn-tasiRNA-2 21-mer
- X** is a DNA base of the *AtTAS1c* precursor included in the oligonucleotides required to clone the syn-tasiRNA insert in B/c vectors
- X** is a DNA base of the *AtTAS1c* precursor

Note that in general, **X<sub>1</sub>=T** and **X<sub>1</sub>=T** for syn-tasiRNA association with AGO1.

In the sequence above, replace the sequences

**X<sub>1</sub>X<sub>2</sub>X<sub>3</sub>X<sub>4</sub>X<sub>5</sub>X<sub>6</sub>X<sub>7</sub>X<sub>8</sub>X<sub>9</sub>X<sub>10</sub>X<sub>11</sub>X<sub>12</sub>X<sub>13</sub>X<sub>14</sub>X<sub>15</sub>X<sub>16</sub>X<sub>17</sub>X<sub>18</sub>X<sub>19</sub>X<sub>20</sub>X<sub>21</sub>** and  
**X<sub>1</sub>X<sub>2</sub>X<sub>3</sub>X<sub>4</sub>X<sub>5</sub>X<sub>6</sub>X<sub>7</sub>X<sub>8</sub>X<sub>9</sub>X<sub>10</sub>X<sub>11</sub>X<sub>12</sub>X<sub>13</sub>X<sub>14</sub>X<sub>15</sub>X<sub>16</sub>X<sub>17</sub>X<sub>18</sub>X<sub>19</sub>X<sub>20</sub>X<sub>21</sub>** by the sequences of syn-tasiRNA\_1 and syn-tasiRNA\_2, respectively.

### 2.2.2. Sequence of the syn-tasiRNA oligonucleotides

The sequences of the two syn-tasiRNA oligonucleotides are:

-Sense oligonucleotide (46 b):

**ATTAX<sub>1</sub>X<sub>2</sub>X<sub>3</sub>X<sub>4</sub>X<sub>5</sub>X<sub>6</sub>X<sub>7</sub>X<sub>8</sub>X<sub>9</sub>X<sub>10</sub>X<sub>11</sub>X<sub>12</sub>X<sub>13</sub>X<sub>14</sub>X<sub>15</sub>X<sub>16</sub>X<sub>17</sub>X<sub>18</sub>X<sub>19</sub>X<sub>20</sub>X<sub>21</sub>X<sub>1</sub>X<sub>2</sub>X<sub>3</sub>X<sub>4</sub>X<sub>5</sub>X<sub>6</sub>X<sub>7</sub>  
X<sub>8</sub>X<sub>9</sub>X<sub>10</sub>X<sub>11</sub>X<sub>12</sub>X<sub>13</sub>X<sub>14</sub>X<sub>15</sub>X<sub>16</sub>X<sub>17</sub>X<sub>18</sub>X<sub>19</sub>X<sub>20</sub>X<sub>21</sub>**

-Antisense oligonucleotide (46 b):

**GTTCY<sub>21</sub>Y<sub>20</sub>Y<sub>19</sub>Y<sub>18</sub>Y<sub>17</sub>Y<sub>16</sub>Y<sub>15</sub>Y<sub>14</sub>Y<sub>13</sub>Y<sub>12</sub>Y<sub>11</sub>Y<sub>10</sub>Y<sub>9</sub>Y<sub>8</sub>Y<sub>7</sub>Y<sub>6</sub>Y<sub>5</sub>Y<sub>4</sub>Y<sub>3</sub>Y<sub>2</sub>Y<sub>1</sub>Y<sub>21</sub>Y<sub>20</sub>Y<sub>19</sub>Y<sub>18</sub>Y<sub>17</sub>  
Y<sub>16</sub>Y<sub>15</sub>Y<sub>14</sub>Y<sub>13</sub>Y<sub>12</sub>Y<sub>11</sub>Y<sub>10</sub>Y<sub>9</sub>Y<sub>8</sub>Y<sub>7</sub>Y<sub>6</sub>Y<sub>5</sub>Y<sub>4</sub>Y<sub>3</sub>Y<sub>2</sub>Y<sub>1</sub>**

Where:

-X<sub>1</sub>X<sub>2</sub>X<sub>3</sub>X<sub>4</sub>X<sub>5</sub>X<sub>6</sub>X<sub>7</sub>X<sub>8</sub>X<sub>9</sub>X<sub>10</sub>X<sub>11</sub>X<sub>12</sub>X<sub>13</sub>X<sub>14</sub>X<sub>15</sub>X<sub>16</sub>X<sub>17</sub>X<sub>18</sub>X<sub>19</sub>X<sub>20</sub>X<sub>21</sub>=syn-tasiRNA-1  
sequence

-X<sub>1</sub>X<sub>2</sub>X<sub>3</sub>X<sub>4</sub>X<sub>5</sub>X<sub>6</sub>X<sub>7</sub>X<sub>8</sub>X<sub>9</sub>X<sub>10</sub>X<sub>11</sub>X<sub>12</sub>X<sub>13</sub>X<sub>14</sub>X<sub>15</sub>X<sub>16</sub>X<sub>17</sub>X<sub>18</sub>X<sub>19</sub>X<sub>20</sub>X<sub>21</sub>=syn-tasiRNA-2  
sequence

-Y<sub>21</sub>Y<sub>20</sub>Y<sub>19</sub>Y<sub>18</sub>Y<sub>17</sub>Y<sub>16</sub>Y<sub>15</sub>Y<sub>14</sub>Y<sub>13</sub>Y<sub>12</sub>Y<sub>11</sub>Y<sub>10</sub>Y<sub>9</sub>Y<sub>8</sub>Y<sub>7</sub>Y<sub>6</sub>Y<sub>5</sub>Y<sub>4</sub>Y<sub>3</sub>Y<sub>2</sub>Y<sub>1</sub>=syn-tasiRNA-1  
reverse-complement sequence

-Y<sub>21</sub>Y<sub>20</sub>Y<sub>19</sub>Y<sub>18</sub>Y<sub>17</sub>Y<sub>16</sub>Y<sub>15</sub>Y<sub>14</sub>Y<sub>13</sub>Y<sub>12</sub>Y<sub>11</sub>Y<sub>10</sub>Y<sub>9</sub>Y<sub>8</sub>Y<sub>7</sub>Y<sub>6</sub>Y<sub>5</sub>Y<sub>4</sub>Y<sub>3</sub>Y<sub>2</sub>Y<sub>1</sub>=syn-tasiRNA-2  
reverse-complement sequence

### Example

The sequences of the two oligonucleotides to clone syn-tasiRNAs ‘syn-tasiR-Trich’ (TCCCATTCGATACTGCTCGCC) and ‘syn-tasiR-Ft’ (TTGGTTATAAAGGAAGAGGCC) in positions 3’D3[+] and 3’D4[+] of *AtTAS1c*, respectively, are:

-Sense oligonucleotide (46 b):

**ATTATCCCATTCGATACTGCTCGCCTTGGTTATAAAGGAAGAGGCC**

-Antisense oligonucleotide (46 b):

**GTTCGGCCTCTTCCTTTATAACCAAGGCGAGCAGTATCGAATGGGA**

### 3. Cloning of the amiRNA/syn-tasiRNA sequences in *BsaI/ccdB* (B/c) vectors

*Notes:*

-Available B/c vectors are listed in Table I at the end of the section.

-AtMIR390-B/c- and AtTAS1c-B/c-based vectors must be propagated in a *ccdB* resistant *E. coli* strain such as DB3.1.

-Alternatively, *BsaI* digestion of the B/c vector and subsequent ligation of the amiRNA oligonucleotide insert can be done in separate reactions

#### 3.1. Oligonucleotide annealing

-Dilute sense oligonucleotide and antisense oligonucleotide in sterile H<sub>2</sub>O to a final concentration of 100 μM.

-Prepare Oligo Annealing Buffer:

60 mM Tris-HCl (pH 7.5)  
500 mM NaCl  
60 mM MgCl<sub>2</sub>  
10 mM DTT

*Note: Prepare 1 ml aliquots of Oligo Annealing Buffer and store at -20°C.*

-Assemble the annealing reaction in a PCR tube as described below:

|                                  |              |
|----------------------------------|--------------|
| Forward oligonucleotide (100 μM) | 2 μL         |
| Reverse oligonucleotide (100 μM) | 2 μL         |
| <u>Oligo Annealing Buffer</u>    | <u>46 μL</u> |
| Total volume                     | 50 μL        |

The final concentration of each oligonucleotide is 4 μM.

-Use a thermocycler to heat the annealing reaction 5 min at 94°C and then cool down (0.05°C/sec) to 20°C.

-Dilute the annealed oligonucleotides just prior to assembling the digestion-ligation reaction as described below:

|                           |              |
|---------------------------|--------------|
| Annealed oligonucleotides | 3 μL         |
| <u>dH<sub>2</sub>O</u>    | <u>37 μL</u> |
| Total volume              | 40 μL        |

The final concentration of each oligonucleotide is 0.15 μM.

*Note: Do not store the diluted oligonucleotides.*

### 3.2. Digestion-ligation reaction

- Assemble the digestion-ligation reaction as described below:

|                                   |                   |
|-----------------------------------|-------------------|
| B/c vector (x ug/uL)              | Y $\mu$ L (50 ng) |
| Diluted annealed oligonucleotides | 1 $\mu$ L         |
| 10x T4 DNA ligase buffer          | 1 $\mu$ L         |
| T4 DNA ligase (400 U/ $\mu$ L)    | 1 $\mu$ L         |
| <i>Bsa</i> I (10U/ $\mu$ L, NEB)  | 1 $\mu$ L         |
| dH <sub>2</sub> O                 | to 10 $\mu$ L     |
| Total volume                      | 10 $\mu$ L        |

Prepare a negative control reaction lacking *Bsa*I.

-Mix the reactions by pipetting. Incubate the reactions at room temperature for 5 minutes at 37°C.

### 3.3. *E.coli* transformation and analysis of transformants

-Transform 1-5 ul of the digestion-ligation reaction into an *E. coli* strain that doesn't have *ccd*B resistance (e.g. DH10B, TOP10, ...) to do counter-selection.

-Pick two colonies/construct, grow LB-Kan (100 mg/ml) cultures and purify plasmids.

-Sequence with appropriate primers: M13-F  
(CCCAGTCACGACGTTGTAAAACGACGG) and M13-R  
(CAGAGCTGCCAGGAAACAGCTATGACC) for *pENTR*-based vectors; attB1  
(ACAAGTTTGTACAAAAAAGCAGGCT) and attB2  
(ACCACTTTGTACAAGAAAGCTGGGT) primers for *pMDC32B*-, *pMDC123SB*- or  
*pFK210B*-based vectors).

**Table I:** *BsaI/ccdB*-based ('B/c') vectors for direct cloning of amiRNAs and syn-tasiRNAs.

| Vector                         | Small class | RNA | Bacterial antibiotic resistance | Plant antibiotic resistance | GATEWAY use | Backbone          | Promoter          | Terminator  | Plant species tested                        |
|--------------------------------|-------------|-----|---------------------------------|-----------------------------|-------------|-------------------|-------------------|-------------|---------------------------------------------|
| <i>pENTR-AtMIR390a-B/c</i>     | amiRNA      |     | Kanamycin                       | -                           | Donor       | <i>pENTR</i>      | -                 | -           | -                                           |
| <i>pFK210B-AtMIR390a-B/c</i>   | amiRNA      |     | Spectomycin                     | BASTA                       | -           | <i>pGreen III</i> | <i>CaMV 35S</i>   | <i>rbcS</i> | <i>A. thaliana</i>                          |
| <i>pMDC123SB-AtMIR390a-B/c</i> | amiRNA      |     | Kanamycin                       | BASTA                       | -           | <i>pMDC123</i>    | <i>CaMV 2x35S</i> | -           | <i>A. thaliana</i><br><i>N. benthamiana</i> |
| <i>pMDC32B-AtMIR390a-B/c</i>   | amiRNA      |     | Kanamycin<br>Hygromycin         | Hygromycin                  | -           | <i>pMDC32</i>     | <i>CaMV 2x35S</i> | <i>nos</i>  | <i>A. thaliana</i><br><i>N. benthamiana</i> |
| <i>pENTR-AtTAS1c-B/c</i>       | syn-tasiRNA |     | Kanamycin                       | -                           | Donor       | <i>pENTR</i>      | -                 | -           | -                                           |
| <i>pMDC123SB-AtTAS1c-B/c</i>   | syn-tasiRNA |     | Kanamycin<br>Hygromycin         | BASTA                       | -           | <i>pMDC123</i>    | <i>CaMV 2x35S</i> | <i>nos</i>  | <i>N. benthamiana</i>                       |
| <i>pMDC32B-AtTAS1c-B/c</i>     | syn-tasiRNA |     | Kanamycin<br>Hygromycin         | Hygromycin                  | -           | <i>pMDC32</i>     | <i>CaMV 2x35S</i> | <i>nos</i>  | <i>A. thaliana</i><br><i>N. benthamiana</i> |

## Supplemental Text S1

(A)

>*AtMIR319a*

ACAAACACACGCTCGGACGCATATTACACATGTTTCATACACTTAATACTCGCTGTTTTGAATTGATGTTTT  
AGGAATATATATATGTAGAGAGAGCTTCCTTGAGTCCATTCCACAGGTCGTGATATGATTCAATTAGCTTCCGA  
CTCATTCATCCAAATACCGAGTCGCCAAAATTCAAACTAGACTCGTTAAATGAATGAATGATGCGGTAGAC  
AAATTGGATCATTGATTCTCTTTGATTTGGACTGAAGGGAGCTCCCTCTCTCTTTTGTATTCCAATTTTCTT  
GATTAATCTTTCCCTGCACAAAAACATGCTTGATCCACTAAGTGACATATATGCTGCCTTTCGTATATATAGT  
TCTGGTAAAATTAACATTTTGGGTTTATCTTTATTTAAGGCATCGCCATG

>*AtMIR319a-1*

ACAAACACACGCTCGGACGCATATTACACATGTTTCATACACTTAATACTCGCTGTTTTGAATTGATGTTTT  
TAGGAATATATATATGTAGACGACATTTGTTGAGAATTTTCATTCCACAGGTCGTGATATGATTCAATTAGCTTC  
CGACTCATTCATCCAAATACCGAGTCGCCAAAATTCAAACTAGACTCGTTAAATGAATGAATGATGCGGT  
AGACAAATTTGGATCATTGATTCTCTTTGATTTGAAATACCAACAATGCCGTTCTCTCTTTTGTATTCCAAT  
TTTCTTTGATTAATCTTTCCCTGCACAAAAACATGCTTGATCCACTAAGTGACATATATGCTGCCTTTCGTAT  
ATATAGTTCTGGTAAAATTAACATTTTGGGTTTATCTTTATTTAAGGCATCGCCATG

>*AtMIR319a-2*

ACAAACACACGCTCGGACGCATATTACACATGTTTCATACACTTAATACTCGCTGTTTTGAATTGATGTTTT  
TAGGAATATATATATGTAGAAAGACTCGAAGTTGTCTGACTTCCACAGGTCGTGATATGATTCAATTAGCTTC  
CGACTCATTCATCCAAATACCGAGTCGCCAAAATTCAAACTAGACTCGTTAAATGAATGAATGATGCGGT  
AGACAAATTTGGATCATTGATTCTCTTTGATGTCTGCACTTCGAGCCTTCTCTCTTTTGTATTCCAAT  
TTTCTTTGATTAATCTTTCCCTGCACAAAAACATGCTTGATCCACTAAGTGACATATATGCTGCCTTTCGTAT  
ATATAGTTCTGGTAAAATTAACATTTTGGGTTTATCTTTATTTAAGGCATCGCCATG

>*AtMIR319a-3*

ACAAACACACGCTCGGACGCATATTACACATGTTTCATACACTTAATACTCGCTGTTTTGAATTGATGTTTT  
TAGGAATATATATATGTAGAGGACTACATTTTGCAGACATTTCCACAGGTCGTGATATGATTCAATTAGCTTC  
CGACTCATTCATCCAAATACCGAGTCGCCAAAATTCAAACTAGACTCGTTAAATGAATGAATGATGCGGT  
AGACAAATTTGGATCATTGATTCTCTTTGATATGTCTCCAAAATGTAGCCCTCTCTCTTTTGTATTCCAAT  
TTTCTTTGATTAATCTTTCCCTGCACAAAAACATGCTTGATCCACTAAGTGACATATATGCTGCCTTTCGTAT  
ATATAGTTCTGGTAAAATTAACATTTTGGGTTTATCTTTATTTAAGGCATCGCCATG

>*AtMIR319a-21-5*

ACAAACACACGCTCGGACGCATATTACACATGTTTCATACACTTAATACTCGCTGTTTTGAATTGATGTTTT  
AGGAATATATATATGTAGCCACGTTATTTTTCGCTCAGATTTCCACAGGTCGTGATATGATTCAATTAGCTTCCGA  
CTCATTCATCCAAATACCGAGTCGCCAAAATTCAAACTAGACTCGTTAAATGAATGAATGATGCGGTAGAC  
AAATTGGATCATTGATTCTCTTTGATTTCTGAGGGAAAATAACGCGGCTCTCTTTTGTATTCCAATTTTCTT  
GATTAATCTTTCCCTGCACAAAAACATGCTTGATCCACTAAGTGACATATATGCTGCCTTTCGTATATATAGT  
TCTGGTAAAATTAACATTTTGGGTTTATCTTTATTTAAGGCATCGCCATG

>*AtMIR319a-21-5*

ACAAACACACGCTCGGACGCATATTACACATGTTTCATACACTTAATACTCGCTGTTTTGAATTGATGTTTT  
AGGAATATATATATGTAGAAAGACGTCGAATAAAGCTTCTTCCACAGGTCGTGATATGATTCAATTAGCTTCCGA  
CTCATTCATCCAAATACCGAGTCGCCAAAATTCAAACTAGACTCGTTAAATGAATGAATGATGCGGTAGAC  
AAATTGGATCATTGATTCTCTTTGATGAAGCTATATTGACGTCCTTCTCTCTTTTGTATTCCAATTTTCTT  
GATTAATCTTTCCCTGCACAAAAACATGCTTGATCCACTAAGTGACATATATGCTGCCTTTCGTATATATAGT  
TCTGGTAAAATTAACATTTTGGGTTTATCTTTATTTAAGGCATCGCCATG

>*AtMIR319a-21-6*

ACAAACACACGCTCGGACGCATATTACACATGTTTCATACACTTAATACTCGCTGTTTTGAATTGATGTTTT  
AGGAATATATATATGTAGCGACCTTAGATTAATTTAGGTTCCACAGGTCGTGATATGATTCAATTAGCTTCCGA  
CTCATTCATCCAAATACCGAGTCGCCAAAATTCAAACTAGACTCGTTAAATGAATGAATGATGCGGTAGAC

AAATTGGATCATTGATTCTCTTTGA **TCC**TAAAATAATCTAAGGCCGCTCTCTTTTGTATTCCAATTTTCTT  
GATTAATCTTTCCCTGCACAAAAACATGCTTGATCCACTAAGTGACATATATGCTGCCCTCGTATATATAGT  
TCTGGTAAAAATTAACATTTTGGGTTTATCTTTATTTAAGGCATCGCCATG

**(B)**

**>AtMIR390a**

TATAGGGGGGAAAAAAGGTAGTCATCAGATATATATTTTGGTAAGAAAATATAGAAATGAATAATTTTCAC  
GTTTAAACGAAGAGGAGATGACGTGTGTTCCTTTCGAACCCGAGTTTTGTTTCGTCATATAAATAGCACCTTCTC  
TTCTCCTTCTTCCCTCACTTCCATCTTTTTTAGCTTCACTATCTCTCTATAAATCGGTTTTATCTTTCTCTAAG  
TCACAACCCAAAAAACAAGTAGAGAAGAATCTGTA **AAGCTCAGGAGGGATAGCGCC**ATGATGATCACAT  
TCGTTATCTATTTTTTGG **CGCTATCCATCCTGAGTTTCA**TTGGCTCTTCTTACTACAATGAAAAAGGCCGA  
GGCAAACGCCATAAATCACTTGAGAATCAATTCTTTTTACTGTCCATTTAAGCTATCTTTTATAAACGTG  
TCTTATTTTCTATCTCTTTTTGTTTAAACTAAGAACTATAGTATTTTGTCTAAAACAAAACATGAAAGAAC  
AGATTAGATCTCATCTTTAGTCTC

**>AtMIR390a-1**

TATAGGGGGGAAAAAAGGTAGTCATCAGATATATATTTTGGTAAGAAAATATAGAAATGAATAATTTTCACG  
TTTTAAACGAAGAGGAGATGACGTGTGTTCCTTTCGAACCCGAGTTTTGTTTCGTCATATAAATAGCACCTTCTCT  
TCTCCTTCTTCCCTCACTTCCATCTTTTTTAGCTTCACTATCTCTCTATAAATCGGTTTTATCTTTCTCTAAGT  
CACAACCCAAAAAACAAGTAGAGAAGAATCTGTA **TTGAAATAC**TCAACAATGCCGATGATGATCACATT  
CGTTATCTATTTTTT **CGGCAT**TGTTTAGTATTTCAACA **TTGGCTCTTCTTACT**ACAATGAAAAAGGCCGAG  
GCAAACGCCATAAATCACTTGAGAATCAATTCTTTTTACTGTCCATTTAAGCTATCTTTTATAAACGTGT  
CTTATTTTCTATCTCTTTTTGTTTAAACTAAGAACTATAGTATTTTGTCTAAAACAAAACATGAAAGAACA  
GATTAGATCTCATCTTTAGTCTC

**>AtMIR390a-2**

TATAGGGGGGAAAAAAGGTAGTCATCAGATATATATTTTGGTAAGAAAATATAGAAATGAATAATTTTCAC  
GTTTAAACGAAGAGGAGATGACGTGTGTTCCTTTCGAACCCGAGTTTTGTTTCGTCATATAAATAGCACCTTCTC  
TTCTCCTTCTTCCCTCACTTCCATCTTTTTTAGCTTCACTATCTCTCTATAAATCGGTTTTATCTTTCTCTAAG  
TCACAACCCAAAAAACAAGTAGAGAAGAATCTGTA **TGTCATGTCAACTTCGAGCC**ATGATGATCACAT  
TCGTTATCTATTTTTT **AGGCTCGAAGGTGACATGACACA**TTGGCTCTTCTTACTACAATGAAAAAGGCCGA  
GGCAAACGCCATAAATCACTTGAGAATCAATTCTTTTTACTGTCCATTTAAGCTATCTTTTATAAACGTG  
TCTTATTTTCTATCTCTTTTTGTTTAAACTAAGAACTATAGTATTTTGTCTAAAACAAAACATGAAAGAAC  
AGATTAGATCTCATCTTTAGTCTC

**>AtMIR390a-3**

TATAGGGGGGAAAAAAGGTAGTCATCAGATATATATTTTGGTAAGAAAATATAGAAATGAATAATTTTCAC  
GTTTAAACGAAGAGGAGATGACGTGTGTTCCTTTCGAACCCGAGTTTTGTTTCGTCATATAAATAGCACCTTCTC  
TTCTCCTTCTTCCCTCACTTCCATCTTTTTTAGCTTCACTATCTCTCTATAAATCGGTTTTATCTTTCTCTAAG  
TCACAACCCAAAAAACAAGTAGAGAAGAATCTGTA **TATGTCTCCAAAATGTAGCC**ATGATGATCACAT  
TCGTTATCTATTTTTTGG **GCTACAT**TGTGGAGACATACA **TTGGCTCTTCTTACT**ACAATGAAAAAGGCCGA  
GGCAAACGCCATAAATCACTTGAGAATCAATTCTTTTTACTGTCCATTTAAGCTATCTTTTATAAACGTG  
TCTTATTTTCTATCTCTTTTTGTTTAAACTAAGAACTATAGTATTTTGTCTAAAACAAAACATGAAAGAAC  
AGATTAGATCTCATCTTTAGTCTC

**>AtMIR390a-4**

TATAGGGGGGAAAAAAGGTAGTCATCAGATATATATTTTGGTAAGAAAATATAGAAATGAATAATTTTCAC  
GTTTAAACGAAGAGGAGATGACGTGTGTTCCTTTCGAACCCGAGTTTTGTTTCGTCATATAAATAGCACCTTCTC  
TTCTCCTTCTTCCCTCACTTCCATCTTTTTTAGCTTCACTATCTCTCTATAAATCGGTTTTATCTTTCTCTAAG  
TCACAACCCAAAAAACAAGTAGAGAAGAATCTGTA **TTCTGAGGGAAAAATAACGCGG**ATGATGATCACAT  
TCGTTATCTATTTTTT **CCGCGT**TATTTGTCCCTCAGAACA **TTGGCTCTTCTTACT**ACAATGAAAAAGGCCGA  
GGCAAACGCCATAAATCACTTGAGAATCAATTCTTTTTACTGTCCATTTAAGCTATCTTTTATAAACGTG  
TCTTATTTTCTATCTCTTTTTGTTTAAACTAAGAACTATAGTATTTTGTCTAAAACAAAACATGAAAGAAC  
AGATTAGATCTCATCTTTAGTCTC

**>AtMIR390a-5**



TATAGGGGGGAAAAAAGGTAGTCATCAGATATATATTTTTGGTAAGAAAATATAGAAATGAATAATTTTCAC  
GTTTAAACGAAGAGGAGATGACGTGTGTTCC TTCGAACCCGAGTTTTGTTCGTCTATAAATAGCACCTTCTC  
TTCCTCCTTCTTCCCTCACITCCATCTTTTTTAGCTTCACATATCTCTCTATAAATCGGTTTTATCTTTCTCTAAG  
TCACAACCCAAAAAACAAGTAGAGAAGAATCTGTA TGAAGCTATATTGACGTCCTTTATGATGATCACAT  
TCGTTATCTATTTTTTAAAGGACGTCACATAGCTTCACAATTGGCTCTTCTTACTACAATGAAAAAGGCCGA  
GGCAAAACGCCATAAATCACITTGAGAATCAATCTTTTTTACTGTCCATTTAAGCTATCTTTTTATAAACGTG  
TCTTATTTTTCTATCTCTTTTTGTTTTAACTAAGAACTATAGTATTTTTGTCTAAAACAAAACATGAAAGAAC  
AGATTAGATCTCATCTTTAGTCTC

>AtMIR390a-6

TATAGGGGGGAAAAAAGGTAGTCATCAGATATATATTTTTGGTAAGAAAATATAGAAATGAATAATTTTCAC  
GTTTAAACGAAGAGGAGATGACGTGTGTTCC TTCGAACCCGAGTTTTGTTCGTCTATAAATAGCACCTTCTC  
TTCCTCCTTCTTCCCTCACITCCATCTTTTTTAGCTTCACATATCTCTCTATAAATCGGTTTTATCTTTCTCTAAG  
TCACAACCCAAAAAACAAGTAGAGAAGAATCTGTA TCCTAAAATAATCTAAGGCCGATGATGATCACAT  
TCGTTATCTATTTTTTCCGGCTTAGAGTATTTTAGGACAATTGGCTCTTCTTACTACAATGAAAAAGGCCGA  
GGCAAAACGCCATAAATCACITTGAGAATCAATCTTTTTTACTGTCCATTTAAGCTATCTTTTTATAAACGTG  
TCTTATTTTTCTATCTCTTTTTGTTTTAACTAAGAACTATAGTATTTTTGTCTAAAACAAAACATGAAAGAAC  
AGATTAGATCTCATCTTTAGTCTC

>AtMIR390a-Ft

TATAGGGGGGAAAAAAGGTAGTCATCAGATATATATTTTTGGTAAGAAAATATAGAAATGAATAATTTTCAC  
GTTTAAACGAAGAGGAGATGACGTGTGTTCC TTCGAACCCGAGTTTTGTTCGTCTATAAATAGCACCTTCTC  
TTCCTCCTTCTTCCCTCACITCCATCTTTTTTAGCTTCACATATCTCTCTATAAATCGGTTTTATCTTTCTCTAAG  
TCACAACCCAAAAAACAAGTAGAGAAGAATCTGTA TTGGTTATAAAGGAAGAGGCCATGATGATCACAT  
TCGTTATCTATTTTTTGGCCTCTTCCGTTATAACCAACAATTGGCTCTTCTTACTACAATGAAAAAGGCCGA  
GGCAAAACGCCATAAATCACITTGAGAATCAATCTTTTTTACTGTCCATTTAAGCTATCTTTTTATAAACGTG  
TCTTATTTTTCTATCTCTTTTTGTTTTAACTAAGAACTATAGTATTTTTGTCTAAAACAAAACATGAAAGAAC  
AGATTAGATCTCATCTTTAGTCTC

>AtMIR390a-Lfy

TATAGGGGGGAAAAAAGGTAGTCATCAGATATATATTTTTGGTAAGAAAATATAGAAATGAATAATTTTCAC  
GTTTAAACGAAGAGGAGATGACGTGTGTTCC TTCGAACCCGAGTTTTGTTCGTCTATAAATAGCACCTTCTC  
TTCCTCCTTCTTCCCTCACITCCATCTTTTTTAGCTTCACATATCTCTCTATAAATCGGTTTTATCTTTCTCTAAG  
TCACAACCCAAAAAACAAGTAGAGAAGAATCTGTA TAACAGTGAACGTACTGTGCGCATGATGATCACAT  
TCGTTATCTATTTTTTGGCAGCAGTACTTTTCACTGTTACAATTGGCTCTTCTTACT  
GGCAAAACGCCATAAATCACITTGAGAATCAATCTTTTTTACTGTCCATTTAAGCTATCTTTTTATAAACGTG  
TCTTATTTTTCTATCTCTTTTTGTTTTAACTAAGAACTATAGTATTTTTGTCTAAAACAAAACATGAAAGAAC  
AGATTAGATCTCATCTTTAGTCTC

>AtMIR390a-Ch42

TATAGGGGGGAAAAAAGGTAGTCATCAGATATATATTTTTGGTAAGAAAATATAGAAATGAATAATTTTCAC  
GTTTAAACGAAGAGGAGATGACGTGTGTTCC TTCGAACCCGAGTTTTGTTCGTCTATAAATAGCACCTTCTC  
TTCCTCCTTCTTCCCTCACITCCATCTTTTTTAGCTTCACATATCTCTCTATAAATCGGTTTTATCTTTCTCTAAG  
TCACAACCCAAAAAACAAGTAGAGAAGAATCTGTA TTAAGTGTACGGAAATCCCTATGATGATCACAT  
TCGTTATCTATTTTTTAAAGGATTTCCCTTGACACTTAACAATTGGCTCTTCTTACTACAATGAAAAAGGCCGA  
GGCAAAACGCCATAAATCACITTGAGAATCAATCTTTTTTACTGTCCATTTAAGCTATCTTTTTATAAACGTG  
TCTTATTTTTCTATCTCTTTTTGTTTTAACTAAGAACTATAGTATTTTTGTCTAAAACAAAACATGAAAGAAC  
AGATTAGATCTCATCTTTAGTCTC

>AtMIR390a-Trich

TATAGGGGGGAAAAAAGGTAGTCATCAGATATATATTTTTGGTAAGAAAATATAGAAATGAATAATTTTCAC  
GTTTAAACGAAGAGGAGATGACGTGTGTTCC TTCGAACCCGAGTTTTGTTCGTCTATAAATAGCACCTTCTC  
TTCCTCCTTCTTCCCTCACITCCATCTTTTTTAGCTTCACATATCTCTCTATAAATCGGTTTTATCTTTCTCTAAG  
TCACAACCCAAAAAACAAGTAGAGAAGAATCTGTA TCCCATTCGATACGTCTCGCCATGATGATCACAT  
TCGTTATCTATTTTTTGGCGAGCAGTCTCGAATGGGACAATTGGCTCTTCTTACTACAATGAAAAAGGCCGA  
GGCAAAACGCCATAAATCACITTGAGAATCAATCTTTTTTACTGTCCATTTAAGCTATCTTTTTATAAACGTG  
TCTTATTTTTCTATCTCTTTTTGTTTTAACTAAGAACTATAGTATTTTTGTCTAAAACAAAACATGAAAGAAC  
AGATTAGATCTCATCTTTAGTCTC

**Supplemental Text S1.** DNA sequence in FASTA format of all *MIRNA* foldbacks used in this study to express and analyze amiRNAs. (A) *AtMIR319a* foldbacks. Sequences unique to the pri-miRNA, pre-miRNA, miRNA/amiRNA guide strand and miRNA\*/amiRNA\* strand sequences are highlighted in grey, white, blue and green, respectively. Bases of the pre-*AtMIR319a* that had to be modified to preserve the authentic *AtMIR319a* foldback structure are highlighted in red. Extra bases do to WMD2 design are highlighted in light brown. (B) *AtMIR390a* foldbacks. Sequence unique to the pri-*AtMIR390a* sequence is highlighted in black. Bases of the pre-*AtMIR390a* that had to be modified to preserve the authentic *AtMIR390a* foldback structure are highlighted in red. Other details as in (A).

## Supplemental Text S2

### >AtTAS1c

AAACCTAAACCTAAACGGCTAAGCCCCGACGTCAAATACCAAAAAGAGAAAAACAAGAGCGCCGTCAAGCTC  
TGCAAATACGATCTGTAAGTCCATCTTAAACACAAAAGTGAGATGGGTTCCTTAGATCATGTTCCGCCGTTAG  
ATCGAGTCATGGTCTTGTCTCATAGAAAGGTACTTTTCGTTTACTTCTTTTGGATATCGAGTAGAGCGTCGT  
CTATAGTTAGTTTGGAGATTGCGTTTTGTCAGAAGTTAGGTTCAATGTCCCGGTCCAATTTTACCAGCCATG  
TGTCAAGTTTTCGTTCCCTCCCGTCCCTCTTCTTTGATTTTCGTTGGGTACGGATGTTTTTCGAGATGAAACAGC  
ATTGTTTTGTTGTGATTTTTCTCTACAAGCGAATAGACCATTTATCGGTGGATCTTAGAAAAATTAATTCATA  
GTCCAACATAGCGTAATTCATAAGTTCAACATATCGACGAAC TAGAAAAGACATTTGGACATATTTCCAGGATAT  
GCAAAAAGAAAAACAATGAATATTTGTTTTGAATGTGTTCAAGTAAATGAGATTTTCAAGTCGTCTAAAGAACA  
GTTGCTAATACAGTTACTTATTTCAATAAATAATTTGGTTCTAATAATACAAAACATATTCGAGGATATGCA  
GAAAAAAGATGTTTGTATTTTTGAAAAGCTTGGAGTAGTTTCTCTCCGAGGTGTAGCGAAGAAGCATCATC  
TACTTTGTAATGTAATTTTTCTTTATGTTTTACTTTTGTAATTTTTATTTGTGTTAATGTACCATGGCCGATA  
TCGGTTTTATTTGAAAGAAAATTTATGTTACTTCTGTTTTGGCTTTGCAATCAGTTATGCTAGTTTTCTTTAT  
ACCCTTTCGTAAGCTTCCTAAGGAATCGTTCATTGATTTCCACTGCTTCATTGTATATTA AAACTTTTACAA  
CTGTATCGACCATCATATAAATTTCTGGGTCAAGAGATGAAAATAGAACACCACATCGTAAAGTGAAAT

### >AtTAS1c-D3&D4-Trich

AAACCTAAACCTAAACGGCTAAGCCCCGACGTCAAATACCAAAAAGAGAAAAACAAGAGCGCCGTCAAGCTC  
TGCAAATACGATCTGTAAGTCCATCTTAAACACAAAAGTGAGATGGGTTCCTTAGATCATGTTCCGCCGTTAG  
ATCGAGTCATGGTCTTGTCTCATAGAAAGGTACTTTTCGTTTACTTCTTTTGGATATCGAGTAGAGCGTCGT  
CTATAGTTAGTTTGGAGATTGCGTTTTGTCAGAAGTTAGGTTCAATGTCCCGGTCCAATTTTACCAGCCATG  
TGTCAAGTTTTCGTTCCCTCCCGTCCCTCTTCTTTGATTTTCGTTGGGTACGGATGTTTTTCGAGATGAAACAGC  
ATTGTTTTGTTGTGATTTTTCTCTACAAGCGAATAGACCATTTATCGGTGGATCTTAGAAAAATTAATCCCAT  
TCGATAC TGCTCGCC TCCCATTCGATAC TGCTCGCC GAAC TAGAAAAGACATTTGGACATATTTCCAGGATAT  
GCAAAAAGAAAAACAATGAATATTTGTTTTGAATGTGTTCAAGTAAATGAGATTTTCAAGTCGTCTAAAGAACA  
GTTGCTAATACAGTTACTTATTTCAATAAATAATTTGGTTCTAATAATACAAAACATATTCGAGGATATGCA  
GAAAAAAGATGTTTGTATTTTTGAAAAGCTTGGAGTAGTTTCTCTCCGAGGTGTAGCGAAGAAGCATCATC  
TACTTTGTAATGTAATTTTTCTTTATGTTTTACTTTTGTAATTTTTATTTGTGTTAATGTACCATGGCCGATA  
TCGGTTTTATTTGAAAGAAAATTTATGTTACTTCTGTTTTGGCTTTGCAATCAGTTATGCTAGTTTTCTTTAT  
ACCCTTTCGTAAGCTTCCTAAGGAATCGTTCATTGATTTCCACTGCTTCATTGTATATTA AAACTTTTACAA  
CTGTATCGACCATCATATAAATTTCTGGGTCAAGAGATGAAAATAGAACACCACATCGTAAAGTGAAAT

### >AtTAS1c-D3&D4-Ft

AAACCTAAACCTAAACGGCTAAGCCCCGACGTCAAATACCAAAAAGAGAAAAACAAGAGCGCCGTCAAGCTC  
TGCAAATACGATCTGTAAGTCCATCTTAAACACAAAAGTGAGATGGGTTCCTTAGATCATGTTCCGCCGTTAG  
ATCGAGTCATGGTCTTGTCTCATAGAAAGGTACTTTTCGTTTACTTCTTTTGGATATCGAGTAGAGCGTCGT  
CTATAGTTAGTTTGGAGATTGCGTTTTGTCAGAAGTTAGGTTCAATGTCCCGGTCCAATTTTACCAGCCATG  
TGTCAAGTTTTCGTTCCCTCCCGTCCCTCTTCTTTGATTTTCGTTGGGTACGGATGTTTTTCGAGATGAAACAGC  
ATTGTTTTGTTGTGATTTTTCTCTACAAGCGAATAGACCATTTATCGGTGGATCTTAGAAAAATTAATGGTT  
ATAAAGGAAGAGGCC TGGTTATAAAGGAAGAGGCC GAAC TAGAAAAGACATTTGGACATATTTCCAGGATAT  
GCAAAAAGAAAAACAATGAATATTTGTTTTGAATGTGTTCAAGTAAATGAGATTTTCAAGTCGTCTAAAGAACA  
GTTGCTAATACAGTTACTTATTTCAATAAATAATTTGGTTCTAATAATACAAAACATATTCGAGGATATGCA  
GAAAAAAGATGTTTGTATTTTTGAAAAGCTTGGAGTAGTTTCTCTCCGAGGTGTAGCGAAGAAGCATCATC  
TACTTTGTAATGTAATTTTTCTTTATGTTTTACTTTTGTAATTTTTATTTGTGTTAATGTACCATGGCCGATA  
TCGGTTTTATTTGAAAGAAAATTTATGTTACTTCTGTTTTGGCTTTGCAATCAGTTATGCTAGTTTTCTTTAT  
ACCCTTTCGTAAGCTTCCTAAGGAATCGTTCATTGATTTCCACTGCTTCATTGTATATTA AAACTTTTACAA  
CTGTATCGACCATCATATAAATTTCTGGGTCAAGAGATGAAAATAGAACACCACATCGTAAAGTGAAAT

### >AtTAS1c-D3Trich-D4Ft

AAACCTAAACCTAAACGGCTAAGCCCCGACGTCAAATACCAAAAAGAGAAAAACAAGAGCGCCGTCAAGCTC  
TGCAAATACGATCTGTAAGTCCATCTTAAACACAAAAGTGAGATGGGTTCCTTAGATCATGTTCCGCCGTTAG  
ATCGAGTCATGGTCTTGTCTCATAGAAAGGTACTTTTCGTTTACTTCTTTTGGATATCGAGTAGAGCGTCGT  
CTATAGTTAGTTTGGAGATTGCGTTTTGTCAGAAGTTAGGTTCAATGTCCCGGTCCAATTTTACCAGCCATG  
TGTCAAGTTTTCGTTCCCTCCCGTCCCTCTTCTTTGATTTTCGTTGGGTACGGATGTTTTTCGAGATGAAACAGC  
ATTGTTTTGTTGTGATTTTTCTCTACAAGCGAATAGACCATTTATCGGTGGATCTTAGAAAAATTAATCCCAT

```
TGCATACGCTCGCCTTGGTTATAAAGGAAGAGGCCGAAC TAGAAAAGACATTTGGACATATTTCCAGGATAT
GCAAAAGAAAACAATGAATATTTGTTTTGAATGTGTTCAAGTAAATGAGATTTTCAAGTCGTCTAAAGAACA
GTTGCTAATACAGTTACTTATTTCAATAAATAATGGTTCTAATAATACAAAACATATTCGAGGATATGCA
GAAAAAAGATGTTTGTATTTTGAAGCTTGAGTAGTTTCTCTCCGAGGTGTAGCGAAGAAGCATCATC
TACTTTGTAATGTAATTTCTTTATGTTTTAC TTTGTAATTTTATTTGTGTTAATGTACCATGGCCGATA
TCGGTTTTATTGAAAGAAAATTTATGTTACTTCTGTTTTGGCTTTGCAATCAGTTATGCTAGTTTTCTTAT
ACCCTTTCGTAAGCTTCCTAAGGAATCGTTCATTGATTTCCACTGCTTCATTGTATATTTAAAACTTTACAA
CTGTATCGACCATCATATAAATTCGGGTCAAGAGATGAAAATAGAACACCACATCGTAAAGTAAAAT
```

**>AtTAS1c-D3Ft-D4Trich**

```
AAACCTAAACCTAAACGGCTAAGCCCCGACGTCAAATACCAAAAAGAGAAAAACAAGAGCGCCGTCAAGCTC
TGCAAAATACGATCTGTAAGTCCATCTTAACACAAAAGTGAGATGGGTTCTTTAGATCATGTTCCGCCGTTAG
ATCGAGTCATGGTCTTGTCTCATAGAAAGGTACTTTTCGTTTACTTCTTTTGTAGTATCGAGTAGAGCGTCGT
CTATAGTTAGTTTGTAGATTGCGTTTTGTCAGAAGTTAGGTTCAATGTCCCGGTCCAATTTTACCAGCCATG
TGTGAGTTTTCGTTCCTTCCCGTCCCTTCTTTGATTTTCGTTGGGTTACGGATGTTTTCGAGATGAAACAGC
ATTGTTTTGTTGTGATTTTCTCTACAAGCGAATAGACCATTTATCGGTGGATCTTAGAAAATTAATTGGTT
ATAAAGGAAGAGGCCTCCCATTCGATACGCTCGCCGAAC TAGAAAAGACATTTGGACATATTTCCAGGATAT
GCAAAAGAAAACAATGAATATTTGTTTTGAATGTGTTCAAGTAAATGAGATTTTCAAGTCGTCTAAAGAACA
GTTGCTAATACAGTTACTTATTTCAATAAATAATGGTTCTAATAATACAAAACATATTCGAGGATATGCA
GAAAAAAGATGTTTGTATTTTGAAGCTTGAGTAGTTTCTCTCCGAGGTGTAGCGAAGAAGCATCATC
TACTTTGTAATGTAATTTTCTTTATGTTTTACTTTTGTAAATTTTATTTGTGTTAATGTACCATGGCCGATA
TCGGTTTTATTGAAAGAAAATTTATGTTACTTCTGTTTTGGCTTTGCAATCAGTTATGCTAGTTTTCTTAT
ACCCTTTCGTAAGCTTCCTAAGGAATCGTTCATTGATTTCCACTGCTTCATTGTATATTTAAAACTTTACAA
CTGTATCGACCATCATATAAATTCGGGTCAAGAGATGAAAATAGAACACCACATCGTAAAGTAAAAT
```

**Supplemental Text S2.** DNA sequence in FASTA format of all *AtTAS1c*-based constructs used to express and analyze syn-tasiRNAs. Sequence corresponding to syn-tasiRNA-1 (position 3'D3[+]) and syn-tasiRNA-2 (position 3'D4[+]) is highlighted in blue and green, respectively. Sequence corresponding to Arabidopsis tasiR-3'D[(+), tasiR-3'D4[(+)] is highlighted in dark and light pink, respectively. All the other sequences from Arabidopsis *TAS1c* gene are highlighted in black.

## Supplemental Text S3

DNA sequence of *Bsa*I-*ccdB*-based (B/c) vectors used for direct cloning of amiRNAs or syn-tasiRNAs.

### INDEX

#### 1. amiRNA vectors

>*pENTR-AtMIR390a-B/c*

>*pMDC32B-AtMIR390a-B/c*

>*pMDC123SB-AtMIR390a-B/c*

>*pFK210B-AtMIR390a-B/c*

#### 2. syn-tasiRNA vectors

>*pENTR-AtTAS1c-B/c*

>*pMDC32B-AtTAS1c-B/c*

>*pMDC123SB-AtTAS1c-B/c*

## 1. amiRNA vectors

### >pENTR-AtMIR390a-B/c (4491 bp)

CTTTCCTGCGTTATCCCCTGATTCTGTGGATAACCGTATTACCGCCTTTGAGTGAGCTGATACCGCTCGC  
CGCAGCCGAACGACCGAGCGCAGCGAGTCAGTGAGCGAGGAAGCGGAAGAGCGCCCAATACGCAAACCGC  
CTCTCCCCGCGCGTTGGCCGATTCATTAATGCAGCTGGCACGACAGGTTTCCCAGCTGGAAAGCGGGCAG  
TGAGCGCAACGCAATTAATACGCGTACCGCTAGCCAGGAAGAGTTTGTAGAAACGAAAAAGGCCATCCG  
TCAGGATGGCCTTCTGCTTAGTTTGATGCCCTGGCAGTTTATGGCGGGCGTCTGCCCCGCCACCTCCGGG  
CCGTTGCTTCACAACGTTCAAATCCGCTCCCGCGGATTTGTCTTACTCAGGAGAGCGTTCACCGACAAA  
CAACAGATAAAACGAAAGGCCAGTCTTCCGACTGAGCCTTTCGTTTTATTGATGCCTGGCAGTTCCTT  
ACTCTCGCGTTAACGCTAGCATGGATGTTTTCCAGTCACGACGTTGTAACGACGGCCAGTCTTAAGC  
TCGGGCCCCAAATAATGATTTTATTTTACTGATAGTGACCTGTTTCGTTGCAACAAATTTGATGAGCAATG  
CTTTTTTATAATGCCAACTTTGTACAAAAAAGCAGGCTCCGCGGCCGCCCCCTTACCTATAGGGGGGAA  
AAAAAGGTAGTCATCAGATATATATTTTGGTAAGAAAATATAGAAATGAATAATTTACGTTTAAACGAAG  
AGGAGATGACGTGTGTTCCCTTCGAACCCGAGTTTGTTCGTCTATAAATAGCACCTTCTCTTCTCCTTCT  
TCCTCACTTCCATCTTTTTAGCTTCACTATCTCTCTATAATCGGTTTTATCTTTCTCTAAGTCACAACCC  
AAAAAAACAAAGTAGAGAAGAATCTGTAAGAGACCATTAGGCACCCCAGGCTTTACACTTTTATGCTTCCG  
GCTCGTATAATGTGTGGATTTTGAGTTAGGAGCCGTCGAGATTTTCAGGAGCTAAGGAAGCTAAAatgga  
gaaaaaatcactggatataaccaccggtgatataatcccaatggcatcgtaaagaacatthttgaggcattt  
cagtcagttgctcaatgtacctataaccagaccggtcagctggatattacggcctthtttaagaccgtaa  
agaaaaataagcacaagthttatccggcctthttcacattcttgcccgcctgatgaatgctcatccgga  
gthccgcatggcaatgaaagacggtgagctggtgatatgggatagtgthccacctgttacaccgthttc  
catgagcaaacgaaacgthttcatcgctctggagtgaataaccacgacgattthccggcagthttctacaca  
tatattcgcaagatgtggcgtgttacggtgaaaacctggcctatthccctaaaggthttattgagaatat  
gthtttcgtctcagccaatccctgggtgagthttcaccagthttgatttaaacgtggccaatatggacaac  
thcttcgccccgthttcaccatgggcaaatattatacgcaaggcgacaagtgctgatgccgctggcga  
thcagthtcatcatgccgthttgtgatggcttccatgtcggcagaatgcttaatgaattacaacagtactg  
cgatgagtgccagggcgggcgtaaACGCGTGGAGCCGGCTTACTAAAAGCCAGATAACAGTATGCGTAT  
TTGCGCGCTGATTTTTGCGGTATAAGAAATATACTGATATGTATACCCGAAGTATGTCAAAAAGAGGTA  
TGCTATGAAGCAGCGTATTACAGTGACAGTTGACAGCGACAGCTATCAGTTGCTCAAGGCATATATGATG  
TCAATATCTCCGGTCTGGTAAGCACAAACCATGCAGAATGAAGCCCGTCGCTGCGTGCCGAACGCTGGAA  
AGCGGAAAAATCAGGAAGGGATGGCTGAGGTCGCCCGGTTTTATTGAAATGAACGGCTCTTTTGTGACGAG  
AACAGGGGCTGGTGAAATGCAGTTTAAAGTTTTACACCTATAAAAGAGAGAGCCGTTATCGTCTGTTTTGTG

GATGTACAGAGTGATATTATTGACACGCCCCGGCCGACGGATGGTGATCCCCCTGGCCAGTGCACGTCTGC  
TGTCAGATAAAGTCTCCCGTGAACCTTACCCGGTGGTGCATATCGGGGATGAAAGCTGGCGCATGATGAC  
CACCGATATGGCCAGTGTGCCGGTTTCCGTTATCGGGGAAGAAGTGGCTGATCTCAGCCACCGCGAAAAT  
GACATCAAAAACGCCATTAACCTGATGTTCTGGGGAATATAAATGTCAGGCTCCCTTATACACAGCCAGT  
CTGCACCTCGACggtctcAcattggctcttcttactacaatgaaaaaggccgaggcaaacgcctaaaat  
cattgagaatcaattcttttactgtccatttaagctatcttttataaacgtgtcttattttctatctc  
tttggttaactaagaaactatagtattttgtctaaaacaaaacatgaagaacagattagatctcatc  
tttagtctcAAGGGTGGGCGCGCCGACCAGCTTCTTGTACAAAGTTGGCATTATAAGAAAGCATTGCT  
TATCAATTTGTTGCAACGAACAGGGTCACTATCAGTCAAAAATAAAATCATTTATTTGCCATCCAGCTGATAT  
CCCCATAGTGAGTCGTATTACATGGTCATAGCTGTTTCCTGGCAGCTCTGGCCCCTGTCTCAAAATCTC  
TGATGTTACATTGCACAAGATAAAAAATATATCATCATGAACAATAAACTGTCTGCTTACATAAACAGTA  
ATACAAGGGGTGTTatgagccatattcaacgggaaacgtcgaggccgagtaaatccaacatggatgc  
tgatttatatgggtataaatgggctcgcgataatgtcgggcaatcaggtgcgacaatctatcgcttgat  
gggaagcccgatgcgccagagtgtttctgaaacatggcaaaggtagcgttgccaatgatgttacagatg  
agatggtcagactaaactggctgacggaatttatgcctcttccgacctcaagcattttatccgtactcc  
tgatgatgatggttactcaccactgcatccccgaaaaacagcattccaggtattagaagaatatcct  
gattcaggtgaaaatattggtgatgcgctggcagtgctcctgcgcccgttgattcgattcctggttgta  
attgtccttttaacagcgatcgcgtatttctcctcagcgcgaatcacgaatgaataacgggttggt  
tgatgcgagtgattttgatgacgagcgtaatggctggcctggtgaacaagtctggaaagaaatgcataaa  
cttttgccattctcaccggattcagtcgctcactcatggtgatttctcacttgataaccttatttttgacg  
aggggaaattaataggttgattgatgttgagcagatcggaatcgagaccgataaccaggtcttgccat  
cctatggaactgcctcggtgagttttctccttcattacagaaacggctttttcaaaaataggtattgat  
aatcctgatatgaataaattgcagtttcatttgatgctcagtgagttttcTAATCAGAATTGGTTAATT  
GGTTGTAACACTGGCAGAGCATTACGCTGACTTGACGGGACGGCGCAAGCTCATGACCAAAATCCC'TTAA  
CGTGAGTTACGCGTCGTTCCACTGAGCGTCAGACCCCGTAGAAAAGATCAAAGGATCTTCTTGAGATCCT  
TTTTTTCTGCGCGTAATCTGCTGCTTGCAAACAAAAAACACCAGCTACCAGCGGTGGTTTGT'TTGCCGG  
ATCAAGAGCTACCAACTCTTTTCCGAAGGTAAC'TGGCTTACAGCAGAGCGCAGATACCAATACTGTCTT  
TCTAGTGTAGCCGTAGTTAGGCCACCACTTCAAGAACTCTGTAGCACCGCCTACATACTCGCTCTGCTA  
ATCTGT'TACCAGTGGCTGCTGCCAGTGGCGATAAGTCGTGTCTTACC'GGTGGACTCAAGACGATAGT  
TACCGGATAAGGCGCAGCGGTCGGGCTGAACGGGGGGTTCGTGCACACAGCCAGCTTGGAGCGAACGAC  
CTACACCGAACTGAGATACCTACAGCGTGAGCATTGAGAAAGCGCCACGCTTCCC'GAAGGGAGAAAGGCG  
GACAGGTATCCGGTAAGCGGCAGGGTCGGAACAGGAGAGCGCACGAGGGAGCTTCCAGGGGGAAACGCTT  
GGTATCTTTATAGTCCCTGTCGGGTTTCGCCACCTCTGACTTGAGCGTCGATTTTTTGTGATGCTCGTCAGG

GGGGCGGAGCCTATGGAAAAACGCCAGCAACGCGGCCTTTTTACGGTTCCTGGCCTTTTGCTGGCCTTTT  
GCTCACATGTT

PURPLE/UPPERCASE: M13-F binding site

orange/lowercase: attL1

BLUE/UPPERCASE: *AtMIR390a* 5' region

RED/UPPERCASE: *BsaI* site

magenta/lowercase: chloramphenicol resistance gene

MAGENTA/UPPERCASE: *ccdB* gene

red/lowercase: inverted *BsaI* site

blue/lowercase: *AtMIR390a* 3' region

orange/lowercase/underlined: attL2

PURPLE/UPPERCASE/UNDERLINED: M13-Reverse binding site

brown/lowercase: Kanamycin resistance gene



**>pMDC32B-AtMIR390-B/c (12044 bp)**

CCAGCCAGCCAACAGCTCCCCGACCGGCAGCTCGGCACAAAATCACCACCTCGATACAGGCAGCCCATCAG  
TCCGGGACGGCGTCAGCGGGAGAGCCGTTGTAAGGCGGCAGACTTTGCTCATGTTACCGATGCTATTCGG  
AAGAACGGCAACTAAGCTGCCGGGTTTGAAACACGGATGATCTCGCGGAGGGTAGCATGTTGATTGTAAC  
GATGACAGAGCGTTGCTGCCTGTGATCACCGCGGTTTCAAAAATCGGCTCCGTCGATACTATGTTATACGC  
CAACTTTGAAAACAACTTTGAAAAAGCTGTTTTCTGGTATTTAAGGTTTTAGAAATGCAAGGAACAGTGAA  
TTGGAGTTCGTCTTGTATAATTAGCTTCTTGGGGTATCTTTAAATACTGTAGAAAAGAGGAAGGAAATA  
ATAAatggctaaaatgagaatatcaccggaattgaaaaaactgatcgaaaaataccgctgcgtaaaagat  
acggaaggaatgtctcctgctaaggtatataagctggtgggagaaaatgaaaacctatatttaaaatga  
cggacagccggtataaaggaccacctatgatgtggaacgggaaaaggacatgatgctatggctggaagg  
aaagctgcctgttccaaaggtcctgcactttgaacggcatgatggctggagcaatctgctcatgagtgag  
gccgatggcgtcctttgctcggaaagatgaagatgaacaaagccctgaaaagattatcgagctgtatg  
cggagtgcacaggtcctttcaactccatcgacatatcggattgtccctatacgaatagcttagacagccg  
cttagccgaattggattacttactgaataacgatctggccgatgtggattgcgaaaactgggaagaagac  
actccatttaagatccgcgcgagctgtatgatttttaagacggaaaagcccgaagaggaacttgtct  
tttcccacggcgacctgggagacagcaacatctttgtgaaagatggcaaagtaagtggctttattgatct  
tgggagaagcggcagggcggacaagtggatgacattgccttctgcgtccggtcgatcagggaggatatac  
ggggaagaacagatgtcgcagctattttttgacttactggggatcaagcctgattgggagaaaataaaat  
attatattttactggatgaattgttttagTACCTAGAATGCATGACCAAAATCCCTTAACGTGAGTTTTTC  
GTTCCACTGAGCGTCAGACCCCGTAGAAAAGATCAAAGGATCTTCTTGAGATCCTTTTTTTCTGCGCGTA  
ATCTGCTGCTTGCAACAAAAAAACCACCGCTACCAGCGTGGTTTTGTTTGCCGGATCAAGAGCTACCAA  
CTCTTTTTCCGAAGGTAACCTGGCTTCAGCAGAGCGCAGATACCAAATACTGTCTTCTAGTGTAGCCGTA  
GTTAGGCCACCCTTCAAGAACTCTGTAGCACCGCTACATACCTCGCTCTGCTAATCTGTTACCAGTG  
GCTGCTGCCAGTGGCGATAAGTCGTGTCTTACCGGGTTGGACTCAAGACGATAGTTACCGGATAAGGCGC  
AGCGGTCCGGCTGAACGGGGGGTTCGTGCACACAGCCCAGCTTGGAGCGAACGACCTACACCGAACTGAG  
ATACCTACAGCGTGAGCTATGAGAAAAGCGCCACGCTTCCCGAAGGGAGAAAGGCGGACAGGTATCCGGTA  
AGCGGCAGGGTCGGAACAGGAGAGCGCACGAGGGAGCTTCCAGGGGAAACGCCCTGGTATCTTTATAGTC  
CTGTCCGGTTTTGCCACCTCTGACTTGAGCGTCGATTTTTGTGATGCTCGTCAGGGGGCGGAGCCTATG  
GAAAAACGCCAGCAACCGGGCTTTTTACGGTTCTTGGCTTTTGTGCTGGCTTTTGTCTCACATGTTCTTT  
CCTGCGTTATCCCCCTGATTCTGTGGATAACCGTATTACCGCTTTGAGTGAGCTGATACCGCTCGCCGCA  
GCCGAACGACCGAGCGCAGCGAGTCAGTGAGCGAGGAAGCGGAAGAGCGCCTGATGCGGTATTTTCTCCT  
TACGCATCTGTGCGGTATTTACACCCGCATATGGTGCCTCTCAGTACAATCTGCTCTGATGCCGCATAG  
TTAAGCCAGTATACACTCCGCTATCGCTACGTGACTGGGTCATGGCTGCGCCCCGACACCCGCCAACACC

CGCTGACGCGCCCTGACGGGCTTGTCTGCTCCCGGCATCCGCTTACAGACAAGCTGTGACCGTCTCCGGG  
AGCTGCATGTGTCAGAGGTTTTACCCGTCATCACCGAAACGCGCGAGGCAGGGTGCCTTGATGTGGGCGC  
CGCGGGTCGAGTGGCGACGGCGGGCTTGTCCGCGCCCTGGTAGATTGCCGGCCGTAGGCCAGCCATTT  
TTGAGCGGCCAGCGGCCGCGATAGGCCGACGCGAAGCGGCGGGGCGTAGGGAGCGCAGCGACCGAAGGGT  
AGGCGCTTTTTGACAGCTCTTCGGCTGTGCGCTGGCCAGACAGTTATGCACAGGCCAGGCGGGTTTTAAGA  
GTTTTAATAAGTTTTAAAGAGTTTTAGGCGGAAAAATCGCCTTTTTTCTCTTTTATATCAGTCACTTACA  
TGTGTGACCGGTTCCCAATGTACGGCTTTGGGTTCCCAATGTACGGGTTCCGGTTCCCAATGTACGGCTT  
TGGGTTCCCAATGTACGTGCTATCCACAGGAAAGAGA CTTTTCGACCTTTTTCCCCTGCTAGGGCAATT  
TGCCCTAGCATCTGCTCCGTACATTAGGAACCGGCGGATGCTTCGCCCTCGATCAGGTTGCGGTAGCGCA  
TGACTAGGATCGGGCCAGCCTGCCCCGCTCCTCCTTCAAATCGTACTCCGGCAGGTCATTTGACCCGAT  
CAGCTTGCACACGGTGAAACAGAACTTCTTGAACCTCCTCGGCGCTGCCACTGCGTTTCGTAGATCGTCTTG  
AACAAACCATCTGGCTTCTGCCTTGCTGCGGCGCGGCTGCCAGGCGGTAGAGAAAACGGCCGATGCCGG  
GATCGATCAAAAAGTAATCGGGGTGAACCGTCAGCACGTCCGGGTTCTTGCCTTCTGTGATCTCGCGGTA  
CATCCAATCAGCTAGCTCGATCTCGATGTACTCCGGCCGCCGGTTTTCGCTCTTTACGATCTTGTAGCGG  
CTAATCAAGGCTTCACCCTCGGATACCGTCACCAGGCGGCCGTTCTTGGCCTTCTTCGTACGCTGCATGG  
CAACGTGCGTGGTGTTTAACCGAATGCAGGTTTCTACCAGGTCGTCTTTCTGCTTTCCGCCATCGGCTCG  
CCGGCAGAACTTGAGTACGTCCGCAACGTGTGGACGGAACACGCGGCCGGGCTTGTCTCCCTTCCCTTCC  
CGGTATCGGTTTCATGGATTTCGGTTAGATGGGAAACCGCCATCAGTACCAGGTCGTAATCCCACACACTGG  
CCATGCCGGCCGGCCCTGCGGAAACCTCTACGTGCCCGTCTGGAAGCTCGTAGCGGATCACCTCGCCAGC  
TCGTGCGGTCACGCTTCGACAGACGGAAAACGGCCACGTCCATGATGCTGCGACTATCGCGGGTGCCACG  
TCATAGAGCATCGGAACGAAAAATCTGGTTGCTCGTCGCCCTTGGGCGGCTTCCTAATCGACGGCGCAC  
CGGCTGCCGGCGGTTGCCGGGATTTCTTTCGGGATTCGATCAGCGGCCGCTTGCCACGATTCACCGGGCG  
TGCTTCTGCCTCGATGCGTTGCCGCTGGGCGGCCCTGCGCGGCCCTTCAACTTCTCCACCAGGTCATCACC  
AGCGCCGCGCCGATTTGTACCGGGCCGATGGTTTGCACCGTACGCGGATTCCTCGGGCTTGGGGGTT  
CCAGTGCCATTGCAGGGCCGGCAGACAACCCAGCCGCTTACGCCCTGGCCAACCGCCCGTTCCCTCCACACA  
TGGGGCATTCCACGGCGTCGGTGCCCTGGTTGTTCTTGATTTTCCATGCCGCTCCTTTAGCCGCTAAAAAT  
TCATCTACTCATTATTCATTTGCTCATTACTCTGGTAGCTGCGCGATGTATTAGATAGCAGCTCGGT  
AATGGTCTTGCCCTTGGCGTACCGCGTACATCTTCAGCTTGGTGTGATCCTCCGCCGGCAACTGAAAGTTG  
ACCCGCTTCATGGCTGGCGTGTCTGCCAGGCTGGCCAACGTTGCAGCCTTGCTGCTGCGTGCCTCGGAC  
GGCCGGCACTTAGCGTGTTTGTGCTTTTGTCTCATTCTCTTTACCTCATTAACCTCAAATGAGTTTTGAT  
TTAATTTAGCGGCCAGCGCCTGGACCTCGCGGGCAGCGTCGCCCTCGGGTTCTGATTCAGAACGGTTG  
TGCCGGCGGGCAGTGCCCTGGGTAGCTCACGCGCTGCGTGATACGGGACTCAAGAATGGGCAGCTCGTA  
CCCAGCCAGCGCCTCGGCAACCTCACCGCCGATGCGCGTGCCTTTGATCGCCCGGACACGACAAAGGCC

GCTTGTAGCCTTCCATCCGTGACCTCAATGCGCTGCTTAACCAGCTCCACCAGGTCGGCGGTGGCCATA  
TGTCGTAAGGGCTTGGCTGCACCGGAATCAGCACGAAGTCGGCTGCCTTGATCGCGGACACAGCCAAGTC  
CGCCGCCTGGGGCGCTCCGTGATCACTACGAAGTCGCGCCGGCCGATGGCCTTACAGTCGCGGTCAATC  
GTCGGGCGGTGATGCCGACAACGGTTAGCGGTTGATCTTCCCGCACGGCCGCCAATCGCGGGCACTGC  
CCTGGGGATCGGAATCGACTAACAGAACATCGGCCCGGCGAGTTGCAGGGCGCGGGCTAGATGGGTTGC  
GATGGTCGTCTTGCCGTGACCCGCTTTCTGGTTAAGTACAGCGATAACCTTCATGCGTTCCCTTGCGTA  
TTTTGTTATTTACTCATCGCATCATATACGCAGCGACCGCATGACGCAAGCTGTTTTACTCAAATACACA  
TCACCTTTTTTAGACGGCGCGCTCGGTTTCTTCAGCGCCAAGCTGGCCGGCCAGGCCGCCAGCTTGGA  
TCAGACAAACCGCCAGGATTCATGCAGCCGCACGGTTGAGACGTGCGCGGGCGGCTCGAACACGTACC  
CGGCCGCGATCATCTCCGCTCGATCTCTTCGGTAATGAAAAACGGTTCGTCTGGCCGTCTGGTGCGG  
TTTTATGCTTGTTCCTCTTGGCGTTCATTTCTCGGCGGCCGCCAGGGCGTCGGCCTCGGTCAATGCGTCT  
CACGGAAGGCACCGCGCCGCTTGGCTCGGTGGGCGTCACTTCCCTCGTGCCTCAAGTGCAGCGGTACAG  
GGTCGAGCGATGCACGCCAAGCAGTGCAGCCGCTCTTTCACGGTGCGGCCTTCTGGTCGATCAGCTCG  
CGGGCGTGCGGATCTGTGCCGGGGTGAGGGTAGGGCGGGGGCCAAACTTCACGCCTCGGGCCTTGGCGG  
CCTCGCGCCCCGCTCCGGGTGCGGTGATGATTAGGGAACGCTCGAACTCGGCAATGCCGGCGAACACGGT  
CAACACCATGCGGCCGGCCGGCGTGGTGGTGTGCGGCCACGGCTCTGCCAGGCTACGCAGGCCCGCGCCG  
GCCTCCTGGATGCGCTCGGCAATGTCCAGTAGGTGCGGGGTGCTGCGGGCCAGGCGGTCTAGCCTGGTCA  
CTGTCAACAACGTCGCCAGGGCGTAGGTGGTCAAGCATCTGGCCAGCTCCGGGCGGTGCGCCTGGTGCC  
GGTGATCTTCTCGAAAAACAGCTTGGTGCAGCCGGCCGCGTGCAGTTCGGCCCCTTGGTTGGTCAAGTCC  
TGGTCGTCGGTGCTGACGCGGGCATAGCCCAGCAGGCCAGCGGCGGCGCTCTTGTTCATGGCGTAATGTC  
TCCGGTTCTAGTCGCAAGTATTTACTTTATGCGACTAAAACACGCGACAAGAAAACGCCAGGAAAAGGG  
CAGGGCGGCAGCCTGTGCGTAACTTAGGACTTGTGCGACATGTGCTTTTCAGAAGACGGCTGCACTGAA  
CGTCAGAAGCCGACTGCACTATAGCAGCGGAGGGGTTGGATCAAAGTACTTTGATCCCGAGGGGAACCTT  
GTGGTTGGCATGCACATACAAATGGACGAACGGATAAACCTTTTCACGCCCTTTTAAATATCCGTTATTC  
TAATAAACGCTCTTTTCTCTTAGG**tttaccgccaatatatcctgtca**AACACTGATAGTTTAAACTGAA  
GGCGGGAAACGACAATCTGATCCAAGCTCAAGCTGCTCTAGCATTCGCCATTCAGGCTGCGCAACTGTTG  
GGAAGGGCGATCGGTGCGGGCCTCTTCGCTATTACGCCAGCTGGCGAAAGGGGGATGTGCTGCAAGGCGA  
TTAAGTTGGGTAAACGCCAGGGTTTTCCAGTCACGACGTTGTAAAACGACGGCCAGTGCCAAGCTTGGCG  
TGCTGCA**GGTCAACATGGTGGAGCACGACACACTTGTCTACTCCAAAAATATCAAAGATACAGTCTCAG  
AAGACCAAAGGGCAATTGAGACTTTTCAACAAAGGGTAATATCCGAAACCCTCCTCGGATTCATTGCC  
AGCTATCTGTCACTTTATTTGGAAGATAGTGAAAAGGAAGGTGGCTCCTACAAATGCCATCATTTGGAT  
AAAGGAAAAGCCATCGTTGAAGATGCCTCTGCCGACAGTGGTCCCAAAGATGGACCCCAACCCACGAGGA  
GCATCGTGAAAAAGAAGACGTTCCAACCAGTCTTCAAAGCAAGTGGATTTGATGTGATAACATGGTGG**

GCACGACACACTTGTCTACTCCAAAAATATCAAAGATACAGTCTCAGAAGACCAAAGGGCAATTGAGACT  
TTTCAACAAAAGGGTAATATCCGGAAACCTCCTCGGATTCCATTGCCAGCTATCTGTCACCTTATTGTGA  
AGATAGTGAAAAGGAAGGTGGCTCCTACAAATGCCATCATTCGCGATAAAGGAAAGGCCATCGTTGAAGA  
TGCTCTGCCGACAGTGGTCCCAAAGATGGACCCCCACCCACGAGGAGCATCGTGAAAAAGAAGACGTT  
CCAACCACGTCTTCAAAGCAAGTGGATTGATGTGATATCTCCACTGACGTAAGGGATGACGCACAATCCC  
ACTATCCTTCGCAAGACCCTTCTCTATATAAGGAAGTTCATTTTCATTTGGAGAGGACCTCGACTCTAGA  
GGATCCCCGGGTACCGGGCCCCCTCGAGGCGCGCAAGCTATCAAACAAGTTTGTACAAAAAGCAGG  
CTCCGCGGCCGCCCTTACCCTATAGGGGGGAAAAAAGGTAGTCATCAGATATATATTTTGGTAAGAA  
AATATAGAAATGAATAATTTACGTTTAAACGAAGAGGAGATGACGTGTGTTCCCTTCGAACCCGAGTTTG  
TTGCTCTATAAATAGCACCTTCTCTTCTCCTTCTCCTCACTTCCATCTTTTTAGCTTCACTATCTCTCT  
ATAATCGGTTTTATCTTTCTCTAAGTCACAACCCAAAAAACAAAGTAGAGAAGAATCTGTAAGAGACCA  
TTAGGCACCCAGGCTTTACACTTTATGCTTCCGGCTCGTATAATGTGTGGATTTTGGAGTTAGGAGCCGT  
CGAGATTTTCAGGAGCTAAGGAAGCTAAAatggagaaaaaatcactggatataaccaccgttgatatatc  
ccaatggcatcgtaagaacatthttgagycatttcagtcagttgctcaatgtacataaccagaccgtt  
cagctggatattacggcctthtttaagaccgtaagaaaaataagcacaagthttatccggcctthttc  
acattcttgcccgcctgatgaatgctcatccggagttccgtatggcaatgaaagacggtgagctggtgat  
atgggatagtggtcacccttggttacaccgtthttccatgagcaaaactgaaacgtthttcatcgctctggagt  
gaataccacgacgatttccggcagtttctacacataatctcgcaagatgtggcgtgttacggtgaaaacc  
tggcctatthttccctaaagggtthttattgagaatatgthtttctcagccaatccctgggtgagthttcac  
cagthtttgatttaaacgtggccaatatggacaacttcttcgccccgtthttcaccatgggcaaatattat  
acgcaaggcgacaaggtgctgatgcccgtggcgattcagttcatcatgccgtthttgtgatggcttccatg  
tcggcagaatgcttaatgaattacaacagtactgcatgagtggcagggcgggcgtaaACGCGTGGAGC  
CGGCTTACTAAAAAGCCAGATAACAGTATGCGTATTTGCGCGCTGATTTTTGCGGTATAAGAATATATACT  
GATATGTATACCCGAAGTATGTCAAAAAGAGGTATGCTATGAAGCAGCGTATTACAGTGACAGTTGACAG  
CGACAGCTATCAGTTGCTCAAGGCATATATGATGTCAATATCTCCGGTCTGGTAAGCACAACCATGCAGA  
ATGAAGCCCGTCTGCTGCGTCCGAACGCTGGAAAGCGGAAAATCAGGAAGGGATGGCTGAGGTCGCCCC  
GTTTATTGAAATGAACGGCTCTTTTGTCTGACGAGAACAGGGCTGGTGAAATGCAGTTTAAAGTTTACAC  
CTATAAAAGAGAGAGCCGTTATCGTCTGTTTGTGGATGTACAGAGTGATATTATTGACACGCCCGGCCGA  
CGGATGGTGATCCCCCTGGCCAGTGCACGTCTGCTGTCCAGATAAAGTCTCCCGTGAACCTTACCCGGTGG  
TGCATATCGGGGATGAAAGCTGGCGCATGATGACCACCGATATGGCCAGTGTGCCGGTTTCCGTTATCGG  
GGAAGAAGTGGCTGATCTCAGCCACCGGAAAAATGACATCAAAAACGCCATTAACCTGATGTTCTGGGGA  
ATATAAATGTCAGGCTCCCTTATACACAGCCAGTCTGCACCTCGACggtctcAcattggctcttcttact  
acaatgaaaaaggccgaggcaaaacgcctaaaatcacttgagaatcaattctthtttactgtccatttaag

ctatcctttataaacgtgtcttattttctatctcttttgtttaactaagaactatagtattttgtcta  
aaacaaaacatgaaagaacagattagatctcatctttagtctcAAGGGTGGGCGCGCCGACCCAGCTTTC  
TTGTACAAAGTGGTTCGATAATTCCTTAATTAAGTTCCTAGAGCGGCCCGCCACCGCGGTGGAGCTCG  
AATTTCCCGATCGTTCAAACATTTGGCAATAAAGTTTCCTTAAGATTGAATCCTGTTGCCGGTCTTGCGA  
TGATTATCATATAAATTTCTGTTGAATTACGTTAAGCATGTAATAATTAACATGTAATGCATGACGTTATT  
TATGAGATGGGTTTTTATGATTAGAGTCCCGCAATTATACATTTAATACGCGATAGAAAACAAAATATAG  
CGCGCAAACCTAGGATAAATTTATCGCGCGGGTGTCTATGTTACTGAATTCGTAATCATGGTCATAGC  
TGTTTCCTGTGTGAAAATTGTTATCCGCTCACAAATCCACACAACATACGAGCCGGAAGCATAAAGTGTA  
AGCCTGGGGTGCCTAATGAGTGAGCTAACTCACATTAATGCGTTGCGCTCACTGCCCGCTTCCAGTCG  
GGAAACCTGTCTGTCAGCTGCATTAATGAATCGGCCAACGCGCGGGGAGAGGCGGTTTGCATATTGGCT  
AGAGCAGCTTGCCAACATGGTGGAGCACGACTCTCGTCTACTCCAAGAATATCAAAGATACAGTCTCA  
GAAGACCAAAGGGCTATTGAGACTTTTCAACAAAGGTAATATCGGAAACCTCCTCGGATTCCATTGCC  
CAGCTATCTGTCACTTCATCAAAAAGGACAGTAGAAAAGGAAGGTGGCACCTACAAATGCCATCATTGCGA  
TAAAGGAAAGGCTATCGTTCAAGATGCCCTGCGGACAGTGGTCCCAAAGATGGACCCCCACCCACGAGG  
AGCATCGTGGAAAAAGAAGACGTTCCAACCACGTTCAAAGCAAGTGGATTGATGTGATAACatgggtgg  
agcacgacactctcgtctactccaagaatatcaaagatacagtctcagaagaccaagggtattgagac  
ttttcaacaaagggtaatatcgggaaacctcctcggattccattgccagctatctgtcacttcatcaaa  
aggacagtagaaaaggaagggtggcacctacaaatgccatcattgcgataaaggaaggctatcgttcaag  
atgcctctgccgacagtggtcccaaagatggacccccaccacgaggagcatcgtggaaaaagaagacgt  
tccaaccacgtcttcaaagcaagtggattgatgtgatatctccactgacgtaagggatgacgcacaatcc  
cactatccttcgcaagaccttctctatataaggaagttcatttcatttgagaggACACGCTGAAATCA  
CCAGTCTCTCTACAAATCTATCTCTCTCGAGCTTTCGCAGATCCCGGGGGCAATGAGATATGAAAAA  
GCCTGAACTCACCGCGACGTTCTGTCGAGAAGTTTCTGATCGAAAAGTTCGACAGCGTCTCCGACCTGATG  
CAGCTCTCGGAGGGCGAAGAATCTCGTGCTTTCAGCTTCGATGTAGGAGGGCGTGGATATGTCC'TGCGGG  
TAAATAGCTGCGCCGATGGTTTCTACAAAGATCGTTATGTTTATCGGCACTTTGCATCGGCCGCGCTCCC  
GATTCCGGAAGTGTCTTGACATTGGGGAGTTTAGCGAGAGCCTGACCTATTGCATCTCCCGCCGTGCACAG  
GGTGTACGTTGCAAGACCTGCCTGAAACCGAACTGCCCGCTGTTCTACAACCGGTGCGGGAGGCATGG  
ATGCGATCGCTGCGGCCGATCTTAGCCAGACGAGCGGGTTCGGCCATTCGGACCGCAAGGAATCGGTCA  
ATACACTACATGGCGTGATTTTCATATGCGCGATTGCTGATCCCCATGTGTATCACTGGCAAACCTGTGATG  
GACGACACCGTCAGTGCGTCCGTGCGCAGGCTCTCGATGAGCTGATGCTTTGGGCCGAGGACTGCCCCG  
AAGTCCGGCACCTCGTGACGCGGATTTCCGGCTCCAACAATGTCTGACGGACAATGGCCGCATAACAGC  
GGTCATTGACTGGAGCGAGGCGATGTTCCGGGGATTCCCAATACGAGGTGCGCAACATCTTCTTCTGGAGG  
CCGTGGTTGGCTTGTATGGAGCAGCAGACGCGCTACTTCGAGCGGAGGCATCCGGAGCTTGCAGGATCGC

CACGACTCCGGGCGTATATGCTCCGCATTGGTCTTGACCAACTCTATCAGAGCTTGGTTGACGGCAATTT  
CGATGATGCAGCTTGGGCGCAGGGTCGATGCGACGCAATCGTCCGATCCGGAGCCGGGACTGTCGGGCGT  
ACACAAATCGCCCGAGAAGCGCGGCCGTCTGGACCGATGGCTGTGTAGAAGTACTCGCCGATAGTGGAA  
ACCGACGCCCCAGCACTCGTCCGAGGGCAAAGAAATAGAGTAGATGCCGACCGGATCTGTTCGATCGACAA  
GCTCGAGtttctccataataatgtgtgagtagttcccagataagggaattagggttcctatagggtttcg  
ctcatgtgttgagcatataaagaacccttagtatgtattttgtattttgtaaaatacttctatcaataaaat  
ttctaattcctaaaacccaaaatccagtaactaaaatccagatcCCCCGAATTAATTCGGCGTTAATTCAGT  
ACATTAAAAACGTCCGCAATGTGTTATTAAAGTTGTCTAAGCGTCAATTTGTTTACACCACAATATATCCT  
GCCA

brown/lowercase: kanamycin resistance gene

CYAN/UPPERCASE/UNDERLINED: C->A transversion to block vector's *BsaI* site

cyan/lowercase: T-DNA right border

GREEN/UPPERCASE: 2x35S CaMV promoter

ORANGE/UPPERCASE: attB1

BLUE/UPPERCASE: *AtMIR390a* 5' region

RED/UPPERCASE: *BsaI* site

magenta/lowercase: chloramphenicol resistance gene

MAGENTA/UPPERCASE: *ccdB* gene

red/lowercase: inverted *BsaI* site

blue/lowercase: *AtMIR390a* 3' region

ORANGE/UPPERCASE/UNDERLINED: attB2

GREY/UPPERCASE/UNDERLINED: Nos terminator

green/lowercase: CaMV promoter

BROWN/UPPERCASE: hygromycin resistance gene

green/lowercase/underlined: CaMV terminator

CYAN/UPPERCASE: T-DNA left border

**>pMDC123SB-AtMIR390a-B/c (11519 bp)**

CCAGCCAGCCAACAGCTCCCCGACCGGCAGCTCGGCACAAAATCACCACCTCGATACAGGCAGCCCATCAG  
TCCGGGACGGCGTCAGCGGGAGAGCCGTTGTAAGGCGGCAGACTTTGCTCATGTTACCGATGCTATTCGG  
AAGAACGGCAACTAAGCTGCCGGGTTTGAAACACGGATGATCTCGCGGAGGGTAGCATGTTGATTGTAAC  
GATGACAGAGCGTTGCTGCCTGTGATCACCGCGGTTTCAAAAATCGGCTCCGTCGATACTATGTTATACGC  
CAACTTTGAAAACAACTTTGAAAAAGCTGTTTTCTGGTATTTAAGGTTTTAGAAATGCAAGGAACAGTGAA  
TTGGAGTTCGTCTTGTATAATTAGCTTCTTGGGGTATCTTTAAATACTGTAGAAAAGAGGAAGGAAATA  
ATAAatggctaaaatgagaatatcaccggaattgaaaaaactgatcgaaaaataccgctgcgtaaaagat  
acggaaggaatgtctcctgctaaggtatataagctggtgggagaaaatgaaaacctatatttaaaaatga  
cggacagccggtataaaagggaccacctatgatgtggaacgggaaaaggacatgatgctatggctggaagg  
aaagctgcctgttccaaaggtcctgcactttgaacggcatgatggctggagcaatctgctcatgagtgag  
gccgatggcgtcctttgctcgggaagatgaagatgaacaaagccctgaaaagattatcgagctgtatg  
cggagtgcacaggtcctttcactccatcgacatatcggattgtccctatacgaatagcttagacagccg  
cttagccgaattggattacttactgaataacgatctggccgatgtggattgcgaaaactgggaagaagac  
actccatttaagatccgcgcgagctgtatgatttttaagacggaaaagcccgaagaggaacttgtct  
tttcccacggcgacctgggagacagcaacatctttgtgaaagatggcaaagtaagtggctttattgatct  
tgggagaagcggcagggcggacaagtggatgacattgccttctgcgtccggtcgatcagggaggatatac  
ggggaagaacagatgtcgcagctattttttgacttactggggatcaagcctgattgggagaaaataaaat  
attatattttactggatgaattgttttagTACCTAGAATGCATGACCAAAATCCCTTAACGTGAGTTTTTC  
GTTCCACTGAGCGTCAGACCCCGTAGAAAAGATCAAAGGATCTTCTTGAGATCCTTTTTTTCTGCGCGTA  
ATCTGCTGCTTGCAACAAAAAACCACCGCTACCAGCGGTGGTTTTGTTTGCCGGATCAAGAGCTACCAA  
CTCTTTTTCCGAAGGTAACCTGGCTTCAGCAGAGCGCAGATACCAAATACTGTCTTCTAGTGTAGCCGTA  
GTTAGGCCACCCTTCAAGAACTCTGTAGCACCGCTACATACCTCGCTCTGCTAATCTGTTACCAGTG  
GCTGCTGCCAGTGGCGATAAGTCGTGTCTTACCGGGTTGGACTCAAGACGATAGTTACCGGATAAGGCGC  
AGCGGTCCGGCTGAACGGGGGGTTCGTGCACACAGCCCAGCTTGGAGCGAACGACCTACACCGAACTGAG  
ATACCTACAGCGTGAGCTATGAGAAAAGCGCCACGCTTCCCGAAGGGAGAAAGGCGGACAGGTATCCGGTA  
AGCGGCAGGGTCGGAACAGGAGAGCGCACGAGGGAGCTTCCAGGGGAAACGCCGTGGTATCTTTATAGTC  
CTGTCCGGTTTTGCCACCTCTGACTTGAGCGTCGATTTTTGTGATGCTCGTCAGGGGGGCGGAGCCTATG  
GAAAAACGCCAGCAACCGGGCTTTTTACGGTTCTTGGCCTTTTGTGCTGGCCTTTTGTCTCACATGTTCTTT  
CCTGCGTTATCCCCCTGATTCTGTGGATAACCGTATTACCGCCTTTGAGTGAGCTGATACCGCTCGCCGCA  
GCCGAACGACCGAGCGCAGCGAGTCAGTGAGCGAGGAAGCGGAAGAGCGCCTGATGCGGTATTTTCTCCT  
TACGCATCTGTGCGGTATTTACACCCGCATATGGTGCCTCTCAGTACAATCTGCTCTGATGCCGCATAG  
TTAAGCCAGTATACACTCCGCTATCGCTACGTGACTGGGTCATGGCTGCGCCCCGACACCCGCCAACACC

CGCTGACGCGCCCTGACGGGCTTGTCTGCTCCCGGCATCCGCTTACAGACAAGCTGTGACCGTCTCCGGG  
AGCTGCATGTGTCAGAGGTTTTACCCGTCATCACCGAAACGCGCGAGGCAGGGTGCCTTGATGTGGGCGC  
CGGCGGTTCGAGTGGCGACGGCGGGCTTGTCCGCGCCCTGGTAGATTGCCGCGCCGTAGGCCAGCCATTT  
TTGAGCGGCCAGCGGCCGCGATAGGCCGACGCGAAGCGGCGGGGCGTAGGGAGCGCAGCGACCGAAGGGT  
AGGCGCTTTTTGACAGTCTTCGGCTGTGCGCTGGCCAGACAGTTATGCACAGGCCAGGCGGGTTTTAAGA  
GTTTTAATAAGTTTTAAAGAGTTTTAGGCGGAAAAATCGCCTTTTTTCTCTTTTATATCAGTCACTTACA  
TGTGTGACCGGTTCCCAATGTACGGCTTTGGGTTCCCAATGTACGGGTTCCGGTTCCCAATGTACGGCTT  
TGGGTTCCCAATGTACGTGCTATCCACAGGAAAGAGA<sup>A</sup>CTTTTCGACCTTTTTCCCTGCTAGGGCAATT  
TGCCCTAGCATCTGCTCCGTACATTAGGAACCGGCGGATGCTTCGCCCTCGATCAGGTTGCGGTAGCGCA  
TGACTAGGATCGGGCCAGCCTGCCCCGCTCCTCCTTCAAATCGTACTCCGGCAGGTCATTTGACCCGAT  
CAGCTTGCACGCGTGAACAGAACTTCTTGAACCTCCTCCGGCGCTGCCACTGCGTTTCGTAGATCGTCTTG  
AACAAACCATCTGGCTTCTGCCTTGCTGCGGCGCGGCTGCCAGGCGGTAGAGAAAACGGCCGATGCCGG  
GATCGATCAAAAAGTAATCGGGGTGAACCGTCAGCACGTCCGGGTTCTTGCCTTCTGTGATCTCGCGGTA  
CATCCAATCAGCTAGCTCGATCTCGATGTACTCCGGCCGCCGGTTTCGCTCTTTACGATCTTGTAGCGG  
CTAATCAAGGCTTCACCCTCGGATACCGTCACCAGGCGGCCGTTCTTGGCCTTCTTCGTACGCTGCATGG  
CAACGTGCGTGGTGTTTAACCGAATGCAGGTTTCTACCAGGTCGTCTTTCTGCTTTCCGCCATCGGCTCG  
CCGGCAGAACTTGAGTACGTCCGCAACGTGTGGACGGAACACGCGGCCGGGCTTGTCTCCCTTCCCTTCC  
CGGTATCGGTTTCATGGATTTCGGTTAGATGGGAAACCGCCATCAGTACCAGGTCGTAATCCCACACACTGG  
CCATGCCGGCCGGCCCTGCGGAAACCTCTACGTGCCCGTCTGGAAGCTCGTAGCGGATCACCTCGCCAGC  
TCGTGCGGTCACGCTTCGACAGACGGAAAACGGCCACGTCCATGATGCTGCGACTATCGCGGGTGCCACG  
TCATAGAGCATCGGAACGAAAAATCTGGTTGCTCGTCGCCCTTGGGCGGCTTCC<sup>A</sup>ATCGACGGCGCAC  
CGGCTGCCGGCGGTTGCCGGGATTTCTTTCGGGATTCGATCAGCGGCCGCTTGGCACGATTCACCGGGCG  
TGCTTCTGCCTCGATGCGTTGCCGCTGGGCGGCCCTGCGCGGCCCTTCAACTTCTCCACCAGGTCATACCC  
AGCGCCGCGCCGATTTGTACCGGGCCGATGGTTTGCACCGTCACGCCGATTCCTCGGGCTTGGGGGTT  
CCAGTGCCATTGCAGGGCCGGCAGACAACCCAGCCGCTTACGCCCTGGCCAACCGCCCGTTCCCTCCACACA  
TGGGGCATTCCACGGCGTCGGTGCCTGGTTGTTCTTGATTTTCCATGCCGCCTCCTTTAGCCGCTAAAAT  
TCATCTACTCATTATTCATTTGCTCATTACTCTGGTAGCTGCGCGATGTATTAGATAGCAGCTCGGT  
AATGGTCTTGCCTTGGCGTACCGCGTACATCTTCAGCTTGGTGTGATCCTCCGCCGGCAACTGAAAGTTG  
ACCCGCTTCATGGCTGGCGTGTCTGCCAGGCTGGCCAACGTTGCAGCCTTGTGCTGCGTGCCTCGGAC  
GGCCGGCACTTAGCGTGTTTGTGCTTTTGTCTCATTCTCTTTACCTCATTAAC<sup>T</sup>CAAATGAGTTTTGAT  
TTAATTTAGCGGCCAGCGCCTGGACCTCGCGGGCAGCGTCGCCCTCGGGTTCTGATTCAGAACGGTTG  
TGCCGGCGGGCAGTGCCTGGGTAGCTCACGCGCTGCGTGATACGGGACTCAAGAATGGGCAGCTCGTA  
CCCAGCCAGCGCCTCGGCAACCTCACCGCCGATGCGCGTGCCTTTGATCGCCCGGACACGACAAAGGCC



GCTTGTAGCCTTCCATCCGTGACCTCAATGCGCTGCTTAACCAGCTCCACCAGGTCGGCGGTGGCCATA  
TGTCGTAAGGGCTTGGCTGCACCGGAATCAGCACGAAGTCGGCTGCCTTGATCGCGGACACAGCCAAGTC  
CGCCGCTGGGGCGCTCCGTGATCACTACGAAGTCGCGCCGGCCGATGGCCTTACGTCGCGGTCAATC  
GTCGGGCGGTGATGCCGACAACGGTTAGCGGTTGATCTTCCCGCACGGCCGCCAATCGCGGGCACTGC  
CCTGGGGATCGGAATCGACTAACAGAACATCGGCCCCGGCGAGTTGCAGGGCGCGGGCTAGATGGGTTGC  
GATGGTCGTCTTGCCGTGACCCGCTTTCTGGTTAAGTACAGCGATAACCTTCATGCGTTCCCTTGCGTA  
TTTTGTTATTTACTCATCGCATCATATACGCAGCGACCGCATGACGCAAGCTGTTTTACTCAAATACACA  
TCACCTTTTTTAGACGGCGCGCTCGGTTTCTTCAGCGCCAAGCTGGCCGGCCAGGCCGCCAGCTTGGA  
TCAGACAAACCGCCAGGATTCATGCAGCCGCACGGTTGAGACGTGCGCGGGCGGCTCGAACACGTACC  
CGGCCGCGATCATCTCCGCTCGATCTCTTCGGTAATGAAAAACGGTTCGTCTGGCCGTCTGGTGCGG  
TTTTATGCTTGTTCCTCTTGGCGTTCATTTCTCGGCGGCCGCCAGGGCGTCGGCCTCGGTCAATGCGTCT  
CACGGAAGGCACCGCGCCGCTTGGCTCGGTGGGCGTCACTTCCCTCGCTGCGCTCAAGTGCAGCGGTACAG  
GGTCGAGCGATGCACGCCAAGCAGTGCAGCCGCTCTTTACGGTGCAGGCTTCTGGTTCGATCAGCTCG  
CGGGCGTGCGGATCTGTGCCGGGGTGAGGGTAGGGCGGGGGCCAAACTTCACGCCTCGGGCTTGGCGG  
CCTCGCGCCCGCTCCGGGTGCGGTGATGATTAGGGAACGCTCGAACTCGGCAATGCCGGCGAACACGGT  
CAACACCATGCGGCCGGCCGGCGTGGTGGTGTGCGGCCACGGCTCTGCCAGGCTACGCAGGCCCGCGCCG  
GCCTCCTGGATGCGCTCGGCAATGTCCAGTAGGTGCGGGGTGCTGCGGGCCAGGCGGTCTAGCCTGGTCA  
CTGTCAACAACGTCGCCAGGGCGTAGGTGGTCAAGCATCTGGCCAGCTCCGGGCGGTGCGCCTGGTGCC  
GGTGATCTTCTCGAAAAACAGCTTGGTGCAGCCGGCCGCGTGCAGTTCGGCCCGTTGGTTGGTCAAGTCC  
TGGTCGTCGGTGCTGACGCGGGCATAGCCCAGCAGGCCAGCGGCGGCGCTCTTGTTCATGGCGTAATGTC  
TCCGGTTCTAGTCGCAAGTATTTACTTTATGCGACTAAAACACGCGACAAGAAAACGCCAGGAAAAGGG  
CAGGGCGGCAGCCTGTGCGTAACTTAGGACTTGTGCGACATGTCGTTTTTCAGAAGACGGCTGCACTGAA  
CGTCAGAAGCCGACTGCACTATAGCAGCGAGGGGTTGGATCAAAGTACTTTTGATCCCGAGGGGAACCTT  
GTGGTTGGCATGCACATACAAATGGACGAACGGATAAACCTTTTTCAGCCCTTTTAAATATCCGTTATTC  
TAATAAACGCTCTTTTCTCTTAGG**tttaccgccaatatatcctgtca**AACACTGATAGTTTAAACTGAA  
GGCGGGAAACGACAATCTGATCCAAGCTCAAGCTGCTCTAGCATTCGCCATTCAGGCTGCGCAACTGTTG  
GGAAGGGCGATCGGTGCGGGCTCTTCGCTATTACGCCAGCTGGCGAAAGGGGGATGTGCTGCAAGGCGA  
TTAAGTTGGGTAAACGCCAGGGTTTTCCAGTCACGACGTTGTAAAACGACGGCCAGTGCCAAGCTTGCAT  
GCCTGCA**GGTCAACATGGTGGTGCACGACACACTTGTCTACTCCAAAAATATCTTTGATACAGTCTCAGA  
AGACCAAAGGGCAATTGAGACTTTTCAACAAAGGGTAATATCCGAAACCCTCTCGGATTCATTTGCCCA  
GCTATCTGTCACTTTATTTGTGAAGATAGTGAAAAAGGAAGGTGGCTCCTACAAATGCCATCATTGCGATA  
AAGGAAAGGCCATCGTTGAAGATGCCCTCTGCCGACAGTGGTCCCAAAGATGGACCCCCACCCACGAGGAG  
CATCGTGGAAAAAGAAGACGTTCCAACCACGCTTCAAAGCAAGTGGATTGATGTGATAACATGGTGGAG**

CACGACACACTTGTCTACTCCAAAAATATCAAAGATACAGTCTCAGAAGACCAAAGGGCAATTGAGACTT  
TTCAACAAAGGGTAATATCCGGAAACCTCCTCGGATTCATTGCCAGCTATCTGTCACTTTATTGTGAA  
GATAGTGAAAAGGAAGGTGGCTCCTACAAATGCCATCATTGCGATAAAGGAAAGGCCATCGTTGAAGAT  
GCCTCTGCCGACAGTGGTCCCAAAGATGGACCCCCACCCACGAGGAGCATCGTGGAAAAAGAAGACGTTT  
CAACCACGTCTTCAAAGCAAGTGGATTGATGTGATATCTCCACTGACGTAAGGGATGACGCACAATCCCA  
CTATCCTTCGCAAGACCCTTCTCTATATAAGGAAGTTCATTTTCATTTGGAGAGGACCTCGACTCTAGAG  
GATCCCGGGTACCGGGCCCCCTCGAGGCGCGCAAGCTATCAAACAAGTTTGTACAAAAAAGCAGGC  
TCCGCGGCCGCCCTTACCCTATAGGGGGGAAAAAAGGTAGTCATCAGATATATATTTTGGTAAGAAA  
ATATAGAAATGAATAATTTACGTTTAAACGAAGAGGAGATGACGTGTGTTCCTTCGAACCCGAGTTTTGT  
TCGTCTATAAATAGCACCTTCTCTTCTCCTTCTCCTCACTTCCATCTTTTTAGCTTCACTATCTCTCTA  
TAATCGGTTTTTATCTTTCTCTAAGTCACAACCCAAAAAACAAGTAGAGAAGAATCTGTAAAGAGACCAT  
TAGGCACCCCAGGCTTTACACTTTATGCTTCCGGCTCGTATAATGTGTGGATTTTGAGTTAGGAGCCGTC  
GAGATTTTCAGGAGCTAAGGAAGCTAAAatggagaaaaaatcactggatataaccacggttgatataatcc  
caatggcatcgtaaagaacatthttgaggcatttcagtcagttgctcaatgtacctataaccagaccgttc  
agctggatattacggcctthtttaagaccgtaaagaaaaataagcacaagthttatccggcctthttca  
cattcttgccgcctgatgaatgctcatccggagttccgfatggcaatgaaagacggtgagctggtgata  
tgggatagtgttcacccttgttacaccgthttccatgagcaaacgthttcatcgctctggagtg  
aataccacgacgattthccggcagthttctacacatatattcgcaagatgtggcgtgttacggtgaaacct  
ggcctatthccctaaagggtthttattgagaatatgthttctcagccaatccctgggtgagthttcacc  
agthttgatthaaacgtggccaatatggacaacttcttcgccccgthttcaccatgggcaaatattata  
cgcaaggcgacaaggtgctgatgcccgtggcgattcaggttcatcatgcccgtthttgtgatggcttccatgt  
cggcagaatgcttaatgaattacaacagtactgcgatgagtgggcagggcggggcgtaaACGCGTGGAGCC  
GGCTTACTAAAAAGCCAGATAACAGTATGCGTATTTGCGCGCTGATTTTTGCGGTATAAGAATATATACTG  
ATATGTATACCCGAAGTATGTCAAAAAGAGGTATGCTATGAAGCAGCGTATTACAGTGACAGTTGACAGC  
GACAGCTATCAGTTGCTCAAGGCATATATGATGTCAATATCTCCGGTCTGGTAAGCACAACCATGCAGAA  
TGAAGCCCGTCTGCTGCGTGCCGAACGCTGGAAAGCGGAAAATCAGGAAGGGATGGCTGAGGTCGCCCGG  
TTTTATTGAAATGAACGGCTCTTTTGCTGACGAGAACAGGGGCTGGTGAAATGTCAGTTTAAAGTTTACACC  
TATAAAGAGAGAGCCGTTATCGTCTGTTTGTGGATGTACAGAGTGATATTATTGACACGCCCGGCCGAC  
GGATGGTGATCCCCCTGGCCAGTGACAGTCTGCTGTGATAAAGTCTCCCGTGAACTTTACCCGGTGGT  
GCATATCGGGGATGAAAGCTGGCGCATGATGACCACCGATATGGCCAGTGTGCCGGTTTCCGTTATCGGG  
GAAGAAGTGGCTGATCTCAGCCACCGGAAAAATGACATCAAAAACGCCATTAACCTGATGTTCTGGGGAA  
TATAAATGTCAGGCTCCCTTATACACAGCCAGTCTGCACCTCGACggtctcACATTGGCTCTTCTTACTA  
CAATGAAAAAGGCCGAGGCAAAACGCCTAAAATCACTTGAGAATCAATTCTTTTTACTGTCCATTTAAGC

TATCTTTTATAAACGTGTCTTATTTTCTATCTCTTTTGTTTAAACTAAGAACTATAGTATTTTGTCTAA  
AACAAAACATGAAAAGACAGATTAGATCTCATCTTTAGTCTCAAGGGTGGGCGCGCCGACCAGCTTTCT  
TGTACAAAGTGGTTCGATAATTCCTTAATTAAGTCTTAGAGCGGCCGCCACCAGCGGTGGAGCTCGAA  
TTTCCCCGATCGTTCAAACATTTGGCAATAAAGTTTCTTAAGATTGAATCCTGTTGCCGGTCTTGCGATG  
ATTATCATATAAATTTCTGTTGAATTACGTTAAGCATGTAATAATTAACATGTAATGCATGACGTTATTTA  
TGAGATGGGTTTTTATGATTAGAGTCCCAGCAATTATACATTTAATACGCGATAGAAAACAAAATATAGCG  
CGCAAACCTAGGATAAATTTATCGCGCGGGTGTCTATGTTACTAGATCGGGAATTCGTAATCATGGTC  
ATAGCTGTTTCTGTGTGAAATTTGTTATCCGCTCACAATTCACACAACATACGAGCCGGAAGCATAAAG  
TGTAAGCCTGGGGTGCCTAATGAGTGAGCTAACTACATTAATGCGTTGCGCTCACTGCCCGCTTTC  
AGTCGGGAAACCTGTCGTGCCAGCTGCATTAATGAATCGGCCAACGCGCGGGGAGAGGCGGTTTGCAT  
TGGCTAGAGCAGCTTGCCAACATGGTGGAGCACGACTCTCGTCTACTCCAAGAATATCAAAGATACAG  
TCTCAGAAGACCAAAGGGCTATTGAGACTTTTCAACAAAGGGTAATATCGGGAAACCTCCTCGGATTCCA  
TTGCCAGCTATCTGTCACTTCATCAAAAGGACAGTAGAAAAGGAAGGTGGCACCTACAAATGCCATCAT  
TGCGATAAAGGAAAAGGCTATCGTTCAAGATGCCCTTGCCGACAGTGGTCCCAAAGATGGACCCCAACCA  
CGAGGAGCATCGTGAAAAAGAAGACGTTCCAACCAGTCTTCAAAGCAAGTGGATTGATGTGATAACat  
ggaggagcagcagactctcgtctactccaagaatatcaaagatacagtctcagaagaccaagggtatt  
gagacttttcaacaaaggtaatatcggyaaacctcctcggattccattgccagctatctgtcacttca  
tcaaaggacagtagaaaaggaaggtggcacctacaaatgccatcattgcgataaaggaaaggctatcgt  
tcaagatgcctctgccgacagtggtcccaaagatggacccccaccacgaggagcatcgtggaaaaagaa  
gacgttccaaccacgtcttcaaagcaagtggttgatgtgatatctccactgacgtaagggatgacgcac  
aatcccactatccttgcgaagaccttctctatataaggaagttcatttcatttgagaggACACGCTGA  
AATCACCAGTCTCTCTTACAAATCTATCTCTCTCGAGTCTACCATGAGCCAGAACGACGCCCGGCCGA  
CATCCGCGTGCACCCGAGGCGGACATGCCGGCGGTCTGCACCATCGTCAACCCTACATCGAGACAAGC  
ACGGTCAACTTCCGTACCGAGCCGCAGGAACCGCAGGAGTGGACGGACGACCTCGTCCGTCTGCGGGAGC  
GCTATCCCTGGCTCGTCGCCGAGGTGGACGGCGAGGTCGCCGGCATCGCCTACGCGGGCCCCCTGGAAGGC  
ACGCAACGCCTACGACTGGACGGCCGAGTCGACCGTGTACGTCCCCCCGCCACCAGCGGACGGGACTG  
GGCTCCACGCTCTACACCCACCTGCTGAAGTCCCTGGAGGCACAGGGCTTCAAGAGCGTGGTTCGCTGTCA  
TCGGGCTGCCAACGACCCGAGCGTGCATGCACGAGGCGCTCGGATATGCCCCCGCGGCATGCTGCC  
GGCGGCCGGCTTCAAGCACGGGAACTGGCATGACGTGGGTTTCTGGCAGCTGGACTTCAGCCTGCCGGTA  
CCGCCCCGTCCGGTCTGCCCCGTCACCGAGATTTGACTCGAGtttctccataataatgtgtgagtagttc  
ccagataaggaattagggttcctatagggtttcgctcatgtgttgagcatataagaacccttagtatg  
tatttgatttgtaaaatacttctatcaataaaaatttctaattcctaaaaccaaaccagtaactaaat

ccagatcCCCCGAATTAATTCGGCGTTAATTCAGTACATTAAAAACGTCCGCAATGTGTTATTAAGTTGT  
CTAAGCGTCAATTTGTTTACACCACAATATATCCTGCCA

brown/lowercase: kanamycin resistance gene

CYAN/UPPERCASE/UNDERLINED: C->A transversion to block vector's *BsaI* site

cyan/lowercase: T-DNA right border

GREEN/UPPERCASE: 2x35S CaMV promoter

ORANGE/UPPERCASE: attB1

BLUE/UPPERCASE: *AtMIR390a* 5' region

RED/UPPERCASE: *BsaI* site

magenta/lowercase: chloramphenicol resistance gene

MAGENTA/UPPERCASE: *ccdB* gene

red/lowercase: inverted *BsaI* site

blue/lowercase: *AtMIR390a* 3' region

ORANGE/UPPERCASE/UNDERLINED: attB2

GREY/UPPERCASE/UNDERLINED: Nos terminator

green/lowercase: CaMV promoter

BROWN/UPPERCASE/UNDERLINED: BASTA resistance gene

green/lowercase/underlined: CaMV terminator

CYAN/UPPERCASE: T-DNA left border

**>pFK210B-AtMIR390-B/c (7916 bp)**

TGGCAGGATATATTGTGGTGTAAACGTTATCAGCTTGCATGCCGGTCGATCTAGTAACATAGATGACACCG  
CGCGCGATAATTTATCCTAGTTTGCCGCTATATTTTGTTCATCGCGTATTAATGTATAATTGCGG  
GACTCTAATCATAAAAAACCCATCTCATAAATAACGTCATGCATTACATGTTAATTATTACATGCTTAACG  
TAATTCAACAGAAAATTATATGATAATCATCGCAAGACCGGCAACAGGATTCAATCTTAAGAAACTTTATT  
GCCAAATGTTTGAACGATCTGCTTGACTCTAGGGTCATCAGATTTCGGTGACGGGCAGGACCGGACGGG  
GCGGCACCGGCAGGCTGAAGTCCAGCTGCCAGAAACCCACGTCATGCCAGTTCCTCGTTCGCTTGAAGCCGGC  
CGCCCGCAGCATGCCCGGGGGGCATATCCGAGCGCCTCGTGCATGCGCACGCTCGGGTTCGTTGGGCAGC  
CCGATGACAGCGACCACGCTCTTGAAGCCCTGTGCCTCCAGGGACTTCAGCAGGTGGGTGTAGAGCGTGG  
AGCCCAGTCCCGTCCGCTGGTGGCGGGGGGAGACGTACACGGTGGACTCGGCCGTCCAGTTCGTAGGCCTT  
GCGTGCCTTCCAGGGACCCGCGTAGGCGATGCCGGCGACCTCGCCGTCCACCTCGGCGACGAGCCAGGGA  
TAGCGCTCCCGCAGACGGACGAGGTTCGTCCTCCACTCCTGCGGTTCCCTGCGGCTCGGTACGGAAGTTGA  
CCGTGCTTGTCTCGATGTAGTGGTTGACGATGGTGCAGACCGCCGGCATGTCCGCCTCGGTGGCACGGCG  
GATGTCGGCCGGGCGTCTGCTGGGCTCATGGTAGATCCCCTCGATCGAGTTGAGAGTGAATATGAGACT  
CTAATTGGATACCGAGGGGAATTTATGGAACGTCAGTGGAGCATTTTTGACAAGAAATATTTGCTAGCTG  
ATAGTGACCTTAGGCGACTTTTGAACGCGCAATAATGGTTTTCTGACGTATGTGCTTAGCTCATTAAACTC  
CAGAAAACCCGCGGCTCAGTGGCTCCTTCAACGTTGCGGTTCTGTGAGTTCCAAACGTAACCGGCTTGTG  
CCGCGTCATCGGCGGGGGTCATAACGTGACTCCCTTAATTCTCCGTCATGTATCGATAACATTAACGTT  
TACAATTTGCGCCATTCGCCATTCAGGCTGCGCAACTGTTGGGAAGGGCGATCGGTGCGGGCCTCTTCG  
CTATTACGCCAGCTGGCGAAAAGGGGGATGTGCTGCAAGGCGATTAAGTTGGGTAACGCCAGGGTTTTCC  
AGTCACGACGTTGTAACGACGGCCAGTGAGCGCGGTAATACGACTCACTATAGGGCGAATTGGGTAC  
CGGGCCCCCCTCGAGGTCGACGGTATCGATAAGCTTGATATCGAATTCCTGCAGCCCGGGGATCCATT  
CGGTCCCCAGATTAGCCTTTTCAATTTAGAAAAGAAATGCTAACCACAGATGGTTAGAGAGGCTTACGCA  
GCAGGTTCATCAAGACGATCTACCCGAGCAATAATCTCCAGGAAATCAAATACCTTCCCAAGAAGGTTA  
AAGATGCAGTCAAAAGATTCAGGACTAACTGCATCAAGAACACAGAGAAAGATATATTTCTCAAGATCAG  
AAGTACTATTCCAGTATGGACGATTCAGGCTTGCCTTCACAAACCAAGGCAAGTAATAGAGATTGGAGTC  
TCTAAAAGGTAGTTCCCCTGAATCAAAGGCCATGGAGTCAAAGATTCAAATAGAGGACCTAACAGAAC  
TCGCCGTAAAGACTGGCGAACAGTTCATACAGAGTCTCTTACGACTCAATGACAAGAAGAAAATCTTCGT  
Caacatggtggagcacgacacacttgtctactccaaaaatatcaagatacagtctcagaagaccaag  
gcaattgagacttttcaacaaagggtaatatccggaacctcctcggattccattgcccagctatctgtc  
actttattgtgaagatagtgaaaaggaaggtggctcctacaaatgcatcattgcgataaaggaaaggc  
catcgttgaagatgcctctgccgacagtggccccaaagatggacccccaccacgaggagcatcgtggaa  
aaagaagacgttccaaccacgtcttcaagcaagtggtgattgatgtgatatctccactgacgtaagggatg

acgcacaatcccactatccttcgcaagacccttcctctatataaggaagttcatttcatttgagagAAC  
ACGGGGGACGAGCTTCTAGAGGATCACAAAGTTTGTACAAAAAGCAGGCTCCGCGGCCGCCCCCTCACC  
TATAGGGGGGAAAAAAGGTAGTCATCAGATATATATTTTGGTAAGAAAATATAGAAATGAATAATTTCA  
CGTTTAAACGAAGAGGAGATGACGTGTGTTCCCTTCGAACCCGAGTTTGTTCGTCTATAAATAGCACCTTC  
TCTTCTCCTTCTTCCCTCACTTCCATCTTTTTAGCTTCACTATCTCTCTATAATCGGTTTTATCTTTCTCT  
AAGTCACAACCCAAAAAACAAAGTAGAGAAGAATCTGTAAGAGACCATTAGGCACCCCAGGCTTTACAC  
TTTATGCTTCCGGCTCGTATAATGTGTGGATTTTGAGTTAGGAGCCGTCGAGATTTTCAGGAGCTAAGGA  
AGCTAAAatggagaaaaaaatcactggatataaccaccggtgatataatccaatggcatcgtaaagaacat  
tttgaggcatttcagtcagttgctcaatgtacctataaccagaccggttcagctggatattacggcctttt  
taaagaccgtaaagaaaaataagcacaagttttatccggcctttattcacattcttgcccgcctgatgaa  
tgctcatccggagttccgctatggcaatgaaagacggtgagctggtgatatgggatagtggtcacccttgt  
tacaccgttttccatgagcaaacgtaaacggttttcatcgctctggagtgaataccagcagatttcggc  
agtttctacacatatattcgcaagatgtggcgtgttacggtgaaaacctggcctatttcctaaagggtt  
tattgagaatagtttttctcagccaatccctgggtgagtttcaccagttttgattaaacgtggcc  
aatatggacaacttcttcgccccgttttcaccatgggcaaatattatcgcaaggcgacaaggtgctga  
tgccgctggcgattcaggttcatcatgccgtttgtgatggcttccatgtcggcagaatgcttaatgaatt  
acaacagttactgcgatgagtgagggcggggcgtaaacGCGGTGGAGCCGGCTTACTAAAAGCCAGATAA  
CAGTATGCGTATTTGCGCGCTGATTTTGGCGTATAAGAAATATATACTGATATGTATACCCGAAGTATGT  
CAAAAAGAGGTATGCTATGAAGCAGCGTATTACAGTGACAGTTGACAGCGACAGCTATCAGTTGCTCAAG  
GCATATATGATGTCATATCTCCGGTCTGGTAAGCACACCATGCAGAATGAAGCCCCTCGTCTGCGTGC  
CGAACGCTGGAAAGCGGAAAATCAGGAAGGGATGGCTGAGGTCGCCCGTTTATTGAAATGAACGGCTCT  
TTTGCTGACGAGAACAGGGGCTGGTGAAATGCAGTTTAAGGTTTACACCTATAAAAAGAGAGAGCCGTTAT  
CGTCTGTTTGTGGATGTACAGAGTGATATTATTGACACGCCCGCCGACGGATGGTGATCCCCCTGGCCA  
GTGCACGTCTGCTGTCAGATAAAGTCTCCCGTGAACTTTACCCGGTGGTGCATATCGGGGATGAAAGCTG  
GCGCATGATGACCACCGATATGGCCAGTGTGCCGGTTTCCGTTATCGGGGAAGAAGTGGCTGATCTCAGC  
CACCGCGAAAATGACATCAAAAACGCCATTAACTGATGTTCTGGGGAATATAAATGTCAGGCTCCCTTA  
TACACAGCCAGTCTGCACCTCGACggtctcAcattggctcttcttactacaatgaaaaggccgaggcaa  
aacgcctaaaatcacttgagaatcaattctttttactgtccatttaagctatcttttataaacgtgtctt  
attttctatctcttttgttttaaacataagaaactatagtattttgtctaaaacaaaacatgaaagaacaga  
ttagatctcatcttttagtctcAAGGGTGGGCGCGCCGACCAGCTTTCCTTGTACAAAGTGGTGATCCTAG  
CTTTCGTTTCGTATCATCGGTTTCGACAACGTTTCGTCAAGTTCAATGCATCAGTTTCATTGCGCACACACC  
AGAATCCTACTGAGTTTGAGTATTATGGCATTGGGAAAACGTTTTTTCTTGTACCATTTGTTGTGCTTGT  
AATTTACTGTGTTTTTTTATTTCGGTTTTTCGCTATCGAACTGTGAAATGGAAATGGATGGAGAAGAGTTAAT

GAATGATATGGTCCTTTTGTTCATTCTCAAATTAATATTATTTGTTTTTCTCTTATTTGTTGTGTGTTG  
AATTTGAAATTATAAGAGATATGCAAACATTTTGTTTTGAGTAAAAATGTGTCAAATCGTGGCCTCTAAT  
GACCGAAGTTAATATGAGGAGTAAAACACTTGTAGTTGTACCATTATGCTTATTCAC TAGGCAACAAATA  
TATTTTCAGACCTAGAAAAGCTGCAAATGTTACTGAATACAAGTATGTCTCTTGTGTTTTAGACATTTA  
TGAACTTTCCCTTTATGTAATTTTCCAGAATCCTTGTGAGATTCTAATCATTGCTTTATAATTATAGTTAT  
ACTCATGGATTTGTAGTTGAGTATGAAAATATTTTTTAATGCATTTTATGACTTGCCAATTGATTGACAA  
CATGCATCAATCGGAGCTCCAGCTTTTGTTCCTTTAGTGAGGGTTAATCCGAGCTTGGCGTAATCATG  
GTCATAGCTGTTTCCCTGTGTGAAAATGTTATCCGCTCACAATCCACACAACATACGAGCCGGAAGCATA  
AAGTGTAAGCCTGGGGTGCCTAATGAGTGAGCTAACTCACATTAATGCGTTGCGCTCACTGCCCCGCTT  
TCCAGTCGGGAAACCTGTCGTGCCAGCTGCATTAATGAATCGGCCAACGCGCGGGGAGAGGCGGTTTGC  
TATTGGGCGCTCTTCCGCTTCCCTCGCTCACTGACTCGCTGCGCTCGGTCGTTCCGGCTGCGGCGAGCGGTA  
TCAGCTCACTCAAAGGCGGTAATACGGTTATCCACAGAATCAGGGGATAACGCAGGAAAGAACATGAAGG  
CCTtgacaggatatattggcgggtaaaCTAAGTCGCTGTATGTGTTTGTGAGATCTCATGTGAGCAA  
AGGCCAGCAAAAAGCCAGGAACCGTAAAAAGGCCGCGTTGCTGGCGTTTTTCCATAGGCTCCGCCCCCT  
GACGAGCATCACAAAAATCGACGCTCAAGTCAGAGTGGCGAAACCCGACAGGACTATAAAGATACCAGG  
CGTTTTCCCCCTGGAAGCTCCCTCGTGCGCTCTCCTGTTCCGACCCGCGCTTACCGGATACCTGTCCGC  
CTTTCTCCCTTCGGGAAGCGTGGCGCTTTCTCATAGCTCACGCTGTAGGTATCTCAGTTCGGTGTAGGTC  
GTTGCGCTCCAAGCTGGGCTGTGTGCACGAACCCCCGTTACGCCGACCGCTGCGCTTATCCGGTAACT  
ATCGTCTTGAGTCCAACCCGGTAAGACACGACTTATCGCCACTGGCAGCAGCCACTGGTAACAGGATTAG  
CAGAGCGAGGTATGTAGGCGGTGCTACAGAGTTCTTGAAGTGGTGGCCTAACTACGGCTACACTAGAAGA  
ACAGTATTTGGTATCTGCGCTCTGCTGAAGCCAGTTACCTTCGGAAGAAGAGTTGGTAGCTCTTGATCCG  
GCAAACAAACCACCGCTGGTAGCGGTGGTTTTTTTTGTTTGCAAGCAGCAGATTACGCGCAGAAAAAAGG  
ATCTCAAGAAGATCCTTTGATCTTTTCTACGGGGTCTGACGCTCAGTGAACGAAAACCTCACGTTAAGGG  
ATTTTGGTCATGAGATTATCAAAAAGGATCTTCACCTAGATCCTTTTAAATTA AAAATGAAGTTTTAAAT  
CAATCTAAAGTATATATGTGTAACATTGgtctagt gattatttgccgactaccttggtgatctcgccttt  
cacgtagtgaacaaattcttccaactgatctgcgcgcgaggccaagcgatcttcttgccaagataagcc  
tgcctagcttcaagtatgacgggctgatactgggcccggcaggcgtccattgcccagtcggcagcgcacat  
ccttcggcgcgatTTTTGCCGTTactgcgctgtaccaaatgcgggacaacgtaagcactacatttcgctc  
atcgccagcccagtcgggcccgcgagttccatagcgttaaggtttcatttagcgcctcaaatagatcctgt  
tcaggaaccggatcaaagagttcctccgcccgtggacctaccaaggcaacgctatgttctcttgcttttg  
tcagcaagatagccagatcaatgtcgatcgtggctggctcgaagatacctgcaagaatgtcattgcgctg  
ccattctccaaattgcagttcgcgcttagctggataacgccacggaatgatgtcgtcgtgcacaacaatg  
gtgacttctacagcgcggagaatctcgcctctctccaggggaagccgaagtttccaaaaggtcgttgatca

aagctcgcgcgcttggtttcatcaagccttacggtcaccgtaaccagcaaatcaatatcactgtgtggctt  
caggccgccatccactgcgagccgtacaaatgtacggccagcaacgtcggttcgagatggcgctcgatg  
acgccaactacctctgatagttgagtcgatacttcggcgatcaccgcttccctcatAACACCCCTTGTAT  
TACTGTTTATGTAAGCAGACAGTTTTATTGTTTCATGATGATATATTTTTTATCTTGTGCAATGTAACATCA  
GAGATTTTGAGACACAACGTGGCTTTGTTGAATAAAATCGAACTTTTGCTGAGTTGAAGGATCAGATCACG  
CATCTTCCCGACAACGCAGACCGTTCCGTGGCAAAGCAAAAGTTCAAAATCACCAACTGGTCCACCTACA  
ACAAAGCTCTCATCAACCGTGGCTCCCTCACTTTCTGGCTGGATGATGGGGCGATTCAGGCGATCCCCAT  
CCAACAGCCCCGCCGTCGAGCGGGCTTTTTTATCCCCGGAAGCCTGTGGATAGAGGGTAGTTATCCACGTG  
AAACCGCTAATGCCCGCAAAGCCTTGATTCACGGGGCTTCCGGCCCGCTCCAAAACTATCCACGTGA  
AATCGCTAATCAGGGTACGTGAAATCGCTAATCGGAGTACGTGAAATCGCTAATAAGGTCACGTGAAATC  
GCTAATCAAAAAGGCACGTGAGAACGCTAATAGCCCTTTCAGATCAACAGCTTGCAAACACCCCTCGCTC  
CGGCAAGTAGTTACAGCAAGTAGTATGTTCAATTAGCTTTTCAATTATGAATATATATATCAATTATTGG  
TCGCCCTTGGCTTGTGGACAATGCGCTACGCGCACCGGCTCCGCCCGTGGACAACCGCAAGCGGTTGCC  
ACCGTCGAGCGCCAGCGCCTTTGCCACAAACCCGGCGGCCGGCCGCAACAGATCGTTTTATAAATTTTTT  
TTTTTGAAAAAGAAAAAGCCCGAAAGGCGCAACCTCTCGGGCTTCTGGATTTCCGATCCCCGGAATTAG  
AGATCT

brown/lowercase: spectinomycin resistance gene

CYAN/UPPERCASE/UNDERLINED: C->A transversion to block vector's *BsaI* site

CYAN/UPPERCASE: T-DNA left border

GREY/UPPERCASE/UNDERLINED: Nos terminator

BROWN/UPPERCASE/UNDERLINED: BASTA resistance gene

GREY/UPPERCASE: Nos promoter

CYAN/UPPERCASE/UNDERLINED: C->T transversion to block vector's *BsaI* site

GREEN/UPPERCASE: 35S promoter

ORANGE/UPPERCASE: attB1

BLUE/UPPERCASE: *AtMIR390a* 5' region

RED/UPPERCASE: *BsaI* site

magenta/lowercase: chloramphenicol resistance gene

MAGENTA/UPPERCASE: *ccdB* gene

red/lowercase: inverted *BsaI* site

blue/lowercase: *AtMIR390a* 3' region

ORANGE/UPPERCASE/UNDERLINED: attB2



GREY/UPPERCASE/BOLD: Pea rbcS terminator

cyan/lowercase: T-DNA right border

## 2. syn-tasiRNA vectors

### >pENTR-AtTAS1c-B/c (4989 bp)

CTTTCCTGCGTTATCCCCTGATTCTGTGGATAACCGTATTACCGCCTTTGAGTGAGCTGATACCGCTCGC  
CGCAGCCGAACGACCGAGCGCAGCGAGTCAGTGAGCGAGGAAGCGGAAGAGCGCCCAATACGCAAACCGC  
CTCTCCCCGCGCGTTGGCCGATTCATTAATGCAGCTGGCACGACAGGTTTCCCGACTGGAAAGCGGGCAG  
TGAGCGCAACGCAATTAATACGCGTACCGCTAGCCAGGAAGAGTTTGTAGAAACGAAAAAGGCCATCCG  
TCAGGATGGCCTTCTGCTTAGTTTGTATGCCCTGGCAGTTTATGGCGGGCGTCTGCCCCGCCACCTCCGGG  
CCGTTGCTTCACAACGTTCAAATCCGCTCCCGCGGATTTGTCTTACTCAGGAGAGCGTTCACCGACAAA  
CAACAGATAAAAACGAAAGGCCAGTCTTCCGACTGAGCCTTTCGTTTTATTGATGCCTGGCAGTTCCTT  
ACTCTCGCGTTAACGCTAGCATGGATGTTTTCCAGTCACGACGTTGTAAAACGACGGCCAGTCTTAAGC  
TCGGGCCC CAAATAATGATTTTATTTTACTGATAGTGACCTGTTTCGTTGCAACAAATTTGATGAGCAATG  
CTTTTTTATAATGCCAACTTTGTACAAAAAAGCAGGCTCCGCGGCCGCCCCCTTCACC AAACCTAACCT  
AAACGGCTAAGCCCAGCTCAAATACCAAAAAGAGAAAAACAAGAGCGCCGTCAAGCTCTGCAAATACGA  
TCTGTAAGTCCATCTTAACACAAAAGTGAGATGGGTCTTAGATCATGTTCCGCCGTTAGATCGAGTCAT  
GGTCTTGCTCATAGAAAGGTACTTTCGTTTACTTCTTTTGAGTATCGAGTAGAGCGTCGTCTATAGTTA  
GTTTGAGATTGCGTTTGTGTCAGAAGTTAGGTTCAATGTCCCGTCCAATTTTCACCAGCCATGTGTCAGTT  
TCGTTCCCTCCCGTCCCTCTTTGATTTTCGTTGGGTTACGGATGTTTTCGAGATGAAACAGCATTGTTT  
TGTTGTGATTTTTCTCTACAAGCGAATAGACCATTTATCGGTGGATCTTAGAAAATTAAGAGACCATTAG  
GCACCCAGGCTTTACACTTTATGCTTCCGGCTCGTATAATGTGTGGATTTTGAGTTAGGAGCCGTCGAG  
ATTTTCAGGAGCTAAGGAAGCTAAA atggagaaaaaatcactggatataaccaccgttgatataatccaa  
tggcatcgtaaagaacatthttgaggcatttcagtcagttgctcaatgtacctataaccagaccgttcagc  
tggatattacggcctthtttaagaccgtaaaagaaaaataagcacaagthttatccggcctthttacat  
tcttggccgctgatgaatgctcatccggagttccgtagggcaatgaaagacggtgagctggatgatgg  
gatagtggtcacccttggtacaccgthttccatgagcaaaactgaaacgthttcatcgctctggagtgaat  
accacgacgatttccggcagthttctacacatatattcgcaagatgtggcgtgttacgggtgaaaacctggc  
ctatttccctaaagggthttattgagaatatgthtttctcagccaatccctgggtgagthttcaccagt  
thttgatttaaacgtggccaatatggacaacttcttcgccccgthttcaccatgggcaaatattatacgc  
aaggcgacaagggtgctgatgccgtggcgattcagthttcatcatgccgtthttgtgatggcttccatgtcgg  
cagaatgcttaatgaattacaacagtactgcgatgagtgaggcagggcgggcgtaa ACGCGTGGAGCCGGC  
TTACTAAAAGCCAGATAACAGTATGCGTATTTGCGCGCTGATTTTTGCGGTATAAGAATATATACTGATA  
TGATATACCCGAAGTATGTCAAAAAGAGGTATGCTATGAAGCAGCGTATTACAGTGACAGTTGACAGCGAC  
AGCTATCAGTTGCTCAAGGCATATATGATGTCAATATCTCCGGTCTGGTAAGCACAAACCATGCAGAATGA

AGCCCGTCGCTGCGTGCCGAACGCTGGAAAAGCGGAAAAATCAGGAAGGGATGGCTGAGGTGCCCCGGTTT  
ATTGAAATGAACGGCTCTTTTGGCTGACGAGAACAGGGGCTGGTGAAATGCAGTTTAAGGTTTACACCTAT  
AAAAGAGAGAGCCGTTATCGTCTGTTTGTGGATGTACAGAGTGATATTTATGACACGCCCGGCCGACGGA  
TGGTGATCCCCCTGGCCAGTGCACGTCTGCTGTCAGATAAAGTCTCCCGTGAACTTTACCCGGTGGTGCA  
TATCGGGGATGAAAAGCTGGCGCATGATGACCACCGATATGGCCAGTGTGCCGGTTTCCGTTATCGGGGAA  
GAAGTGGCTGATCTCAGCCACCGCGAAAAATGACATCAAAAACGCCATTAACCTGATGTTCTGGGGAATAT  
AAATGTCAGGCTCCCTTATACACAGCCAGTCTGCACCTCGACggtctcAgaactagaaaagacattggac  
atattccaggatatgcaaaagaaaacaatgaatattgttttgatgtttcaagtaaagagattttcaa  
gtcgtctaaagaacagttgctaatacagttacttatttcaataaataattggttctaataatacaaaaca  
tattcgaggatatgcagaaaaaagatgtttgttattttgaaaagcttgagtagtttctctccgagggtg  
agcgaagaagcatcatctactttgtaatgtaattttctttatgttttcactttgtaattttatttgtgtt  
aatgtaccatggccgatatcggttttattgaaagaaaattatgttacttctgttttggtttgcaatca  
ggtatgctagttttcttataccctttcgtaagcttcctaaggaatcgttcattgatttccactgcttcat  
tgtatattaaaactttacaactgtatcgaccatcatataattctgggtcaagagatgaaaatagaacacc  
acatcgtaaagtgaatAAGGGTGGGCGCGCCGACCAGCTTTCCTTGTACAAAGTTGGCATTTATAAGAAA  
GCATTGCTTATCAATTTGTTGCAACGAACAGGTCACTATCAGTCAAAAATAAAATCATTATTTGCCATCCA  
GCTGATATCCCTATAGTGAGTCGTATTACATGGTCATAGCTGTTTCCCTGGCAGCTCTGGCCCCGTGTCTC  
AAAATCTCTGATGTTACATTGCACAAGATAAAAAATATATCATCATGAACAATAAACTGTCTGCTTACAT  
AAACAGTAATACAAGGGGTGTTatgagccatattcaacgggaaacgtcgaggccgcgattaaattccaac  
atggatgctgatttatatgggtataaatgggctcgcgataatgtcgggcaatcaggtcgcacaatctatc  
gcttgatgggaagcccgatgcgccagagttgtttctgaaacatggcaaaggtagcgttgccaatgatgt  
tacagatgagatggtcagactaaactggctgacggaatttatgcctcttccgaccatcaagcattttatc  
cgtactcctgatgatgcatggttactcaccactgcatccccgaaaaacagcattccaggattatagaag  
aatatcctgattcaggtgaaaatattgttgatgcgctggcagtgttcctgcgccggttgattcgattcc  
tgtttgtaattgtccttttaacagcgcgatcgcgtatttctctcgtcagcgcgaatcacgaatgaataac  
ggtttggttgatgcgagtgattttgatgacgagcgtaatggctggcctgttgaacaagtctggaagaaa  
tgcataaacttttgccattctcaccggattcagtcgctcactcatggtgatttctcacttgataaccttat  
ttttgacgaggggaaattaataggttgattgatggttgacgagtcggaatcgcagaccgataccaggat  
cttgccatcctatggaactgcctcggtgagttttctccttcattacagaaacggctttttcaaaaatag  
gtattgataatcctgatatgaataaattgcagtttcatttgatgctcgcgatgagttttcTAATCAGAATT  
GGTTAATTGGTTGTAACACTGGCAGAGCATTACGCTGACTTGACGGGACGGCGCAAGCTCATGACCAAAA  
TCCCTTAACGTGAGTTACGCGTCGTTCCACTGAGCGTCAGACCCCGTAGAAAAGATCAAAGGATCTTCTT  
GAGATCCTTTTTTTCTGCGCGTAATCTGCTGCTTGCAAACAAAAAACCACCGCTACCAGCGGTGGTTTG

TTTGCCGGATCAAGAGCTACCAACTCTTTTTCCGAAGGTAAGTGGCTTCAGCAGAGCGCAGATACCAAAT  
ACTGTCCCTTCTAGTGTAGCCGTAGTTAGGCCACCACTTCAAGAACTCTGTAGCACCGCCTACATACCTCG  
CTCTGCTAATCCTGTTACCAGTGGCTGCTGCCAGTGGCGATAAGTCGTGTCTTACCGGGTTGGACTCAAG  
ACGATAGTTACCGGATAAGGCGCAGCGGTCGGGCTGAACGGGGGGTTCGTGCACACAGCCCAGCTTGGAG  
CGAACGACCTACACCGAACTGAGATACCTACAGCGTGAGCATTGAGAAAGCGCCACGCTTCCCGAAGGGA  
GAAAGGCGGACAGGTATCCGGTAAGCGGCAGGGTCGGAACAGGAGAGCGCACGAGGGAGCTTCCAGGGGG  
AAACGCCTGGTATCTTTATAGTCTCTGTCGGGTTTCGCCACCTCTGACTTGAGCGTCGATTTTTGTGATGC  
TCGTCAGGGGGGCGGAGCCTATGGAAAAACGCCAGCAACGCGGCCTTTTTACGGTTCCTGGCCTTTTTGCT  
GGCCTTTTGCTCACATGTT

PURPLE/UPPERCASE: M13-F binding site

orange/lowercase: attL1

BLUE/UPPERCASE: *AtTAS1c* 5' region

RED/UPPERCASE: *BsaI* site

red/lowercase: inverted *BsaI* site

magenta/lowercase: Chloramphenicol resistance gene

MAGENTA/UPPERCASE: *ccdB* gene

blue/lowercase: *AtTAS1c* 3' region

orange/lowercase/underlined: attL2

PURPLE/UPPERCASE/UNDERLINED: M13-R binding site

brown/lowercase: Kanamycin resistance gene

**>pMDC32B-AtTAS1c-B/c (12550 bp)**

CCAGCCAGCCAACAGCTCCCCGACCGGCAGCTCGGCACAAAATCACCACCTCGATACAGGCAGCCCATCAG  
TCCGGGACGGCGTCAGCGGGAGAGCCGTTGTAAGGCGGCAGACTTTGCTCATGTTACCGATGCTATTCGG  
AAGAACGGCAACTAAGCTGCCGGGTTTGAACACGGATGATCTCGCGGAGGGTAGCATGTTGATTGTAAC  
GATGACAGAGCGTTGCTGCCTGTGATCACCGCGGTTTCAAAAATCGGCTCCGTCGATACTATGTTATACGC  
CAACTTTGAAAACAACTTTGAAAAAGCTGTTTTCTGGTATTTAAGGTTTTAGAAATGCAAGGAACAGTGAA  
TTGGAGTTCGTCTTGTATAATTAGCTTCTTGGGGTATCTTTAAATACTGTAGAAAAGAGGAAGGAAATA  
ATAAatggctaaaatgagaatatcaccggaattgaaaaactgatcgaaaaataccgctgcgtaaaagat  
acggaaggaatgtctcctgctaaggtatataagctggtgggagaaaatgaaaacctatattttaaagatga  
cggacagccggtataaaggaccacctatgatgtggaacgggaaaaggacatgatgctatggctggaagg  
aaagctgcctgttccaaaggtcctgcactttgaacggcatgatggctggagcaatctgctcatgagtgag  
gccgatggcgtcctttgctcggaaagatgaagatgaacaagccctgaaaagattatcgagctgtatg  
cggagtgcacaggtcctttcaactccatcgacatatcggattgtccctatacgaatagcttagacagccg  
cttagccgaattggattacttactgaataacgatctggccgatgtggattgcgaaaactgggaagaagac  
actccatttaaagatccgcgcgagctgtatgatttttaagacggaaaagcccgaagaggaacttgtct  
tttcccacggcgacctgggagacagcaacatctttgtgaaagatggcaaagtaagtggctttattgatct  
tgggagaagcggcagggcggacaagtggatgacattgccttctgcgtccggtcgatcagggaggatatac  
ggggaagaacagatgtcgcagctattttttgacttactggggatcaagcctgattgggagaaaataaaat  
attatattttactggatgaattgttttagTACCTAGAATGCATGACCAAAATCCCTTAACGTGAGTTTTTC  
GTTCCACTGAGCGTCAGACCCCGTAGAAAAGATCAAAGGATCTTCTTGAGATCCTTTTTTTCTGCGCGTA  
ATCTGCTGCTTGCAACAAAAAAACCACCGCTACCAGCGTGGTTTTGTTTGCCGGATCAAGAGCTACCAA  
CTCTTTTTCCGAAGGTAACCTGGCTTCAGCAGAGCGCAGATACCAAATACTGTCTTCTAGTGTAGCCGTA  
GTTAGGCCACCCTTCAAGAACTCTGTAGCACCGCTACATACCTCGCTCTGCTAATCTGTTACCAGTG  
GCTGCTGCCAGTGGCGATAAGTCGTGCTTACCGGGTTGGACTCAAGACGATAGTTACCAGGATAAGGCGC  
AGCGGTCCGGCTGAACGGGGGGTTCGTGCACACAGCCCAGCTTGGAGCGAACGACCTACACCGAACTGAG  
ATACCTACAGCGTGAGCTATGAGAAAAGCGCCACGCTTCCCGAAGGGAGAAAGGCGGACAGGTATCCGGTA  
AGCGGCAGGGTCGGAACAGGAGAGCGCACGAGGGAGCTTCCAGGGGAAACGCCCTGGTATCTTTATAGTC  
CTGTCCGGTTTTGCCACCTCTGACTTGAGCGTCGATTTTTGTGATGCTCGTCAGGGGGGCGGAGCCTATG  
GAAAAACGCCAGCAACCGGGCTTTTTACGGTTCTTGGCTTTTGTGCTGGCTTTTGTCTCACATGTTCTTT  
CCTGCGTTATCCCCCTGATTCTGTGGATAACCGTATTACCGCCTTTGAGTGAGCTGATACCGCTCGCCGCA  
GCCGAACGACCGAGCGCAGCGAGTCAGTGAGCGAGGAAGCGGAAGAGCGCCTGATGCGGTATTTTCTCCT  
TACGCATCTGTGCGGTATTTACACCCGCATATGGTGCCTCTCAGTACAATCTGCTCTGATGCCGCATAG  
TTAAGCCAGTATACACTCCGCTATCGCTACGTGACTGGGTCATGGCTGCGCCCCGACACCCGCCAACACC

CGCTGACGCGCCCTGACGGGCTTGTCTGCTCCCGGCATCCGCTTACAGACAAGCTGTGACCGTCTCCGGG  
AGCTGCATGTGTCAGAGGTTTTACCCGTCATCACCGAAACGCGCGAGGCAGGGTGCCTTGATGTGGGCGC  
CGCGGTCGAGTGGCGACGGCGGGCTTGTCCGCGCCCTGGTAGATTGCCGGCCGTAGGCCAGCCATTT  
TTGAGCGGCCAGCGGCCGCGATAGGCCGACGCGAAGCGGCGGGGCGTAGGGAGCGCAGCGACCGAAGGGT  
AGGCGCTTTTTGACAGCTCTTCGGCTGTGCGCTGGCCAGACAGTTATGCACAGGCCAGGCGGGTTTTAAGA  
GTTTTAATAAGTTTTAAAGAGTTTTAGGCGGAAAAATCGCCTTTTTTCTCTTTTATATCAGTCACTTACA  
TGTGTGACCGGTTCCCAATGTACGGCTTTGGGTTCCCAATGTACGGGTTCCGGTTCCCAATGTACGGCTT  
TGGGTTCCCAATGTACGTGCTATCCACAGGAAAGAGAACTTTTCGACCTTTTTCCCTGCTAGGGCAATT  
TGCCCTAGCATCTGCTCCGTACATTAGGAACCGGCGGATGCTTCGCCCTCGATCAGGTTGCGGTAGCGCA  
TGACTAGGATCGGGCCAGCCTGCCCCGCTCCTCCTTCAAATCGTACTCCGGCAGGTCATTTGACCCGAT  
CAGCTTGCACGCGTGAACAGAACTTCTTGAACCTCCTCGGCGCTGCCACTGCGTTTCGTAGATCGTCTTG  
AACAAACCATCTGGCTTCTGCCTTGCTGCGGCGGGCGTGCAGGCGGTAGAGAAAACGGCCGATGCCGG  
GATCGATCAAAAAGTAATCGGGGTGAACCGTCAGCACGTCCGGGTTCTTGCCTTCTGTGATCTCGCGGTA  
CATCCAATCAGCTAGCTCGATCTCGATGTACTCCGGCCGCCGGTTTCGCTCTTTACGATCTTGTAGCGG  
CTAATCAAGGCTTACCCCTCGGATACCGTCACCAGGCGGCCGTTCTTGGCCTTCTTCGTACGCTGCATGG  
CAACGTGCGTGGTGTTTAACCGAATGCAGGTTTCTACCAGGTCGTCTTTCTGCTTTCCGCCATCGGCTCG  
CCGGCAGAACTTGAGTACGTCCGCAACGTGTGGACGGAACACGCGGCCGGGCTTGTCTCCCTTCCCTTCC  
CGGTATCGGTTTCATGGATTTCGGTTAGATGGGAAACCGCCATCAGTACCAGGTCGTAATCCCACACACTGG  
CCATGCCGGCCGGCCCTGCGGAAACCTCTACGTGCCCGTCTGGAAGCTCGTAGCGGATCACCTCGCCAGC  
TCGTGCGTACGCTTTCGACAGACGGGAAACGGCCACGTCCATGATGCTGCGACTATCGCGGGTGCCACG  
TCATAGAGCATCGGAACGAAAAATCTGGTTGCTCGTCGCCCTTGGGCGGCTTCCTAATCGACGGCGCAC  
CGGCTGCCGGCGGTTGCCGGGATTTCTTTCGGGATTCGATCAGCGGCCGCTTGGCACGATTCACCGGGCG  
TGCTTCTGCCTCGATGCGTTGCCGCTGGGCGGCCCTGCGCGGCCCTTCAACTTCTCCACCAGGTCATACCC  
AGCGCCGCGCCGATTTGTACCGGGCCGATGGTTTGCAGCGTACGCGGATTCCTCGGGCTTGGGGGTT  
CCAGTGCCATTGCAGGGCCGGCAGACAACCCAGCCGCTTACGCCCTGGCCAACCGCCCGTTCCCTCCACACA  
TGGGGCATTCCACGGCGTCGGTGCCTGGTTGTTCTTGATTTTCCATGCCGCTCCTTTAGCCGCTAAAAAT  
TCATCTACTCATTATTCATTTGCTCATTTACTCTGGTAGCTGCGCGATGTATTAGATAGCAGCTCGGT  
AATGGTCTTGCCTTGGCGTACCGCGTACATCTTCAGCTTGGTGTGATCCTCCGCCGGCAACTGAAAGTTG  
ACCCGCTTCATGGCTGGCGTGTCTGCCAGGCTGGCCAACGTTGCAGCCTTGTGCTGCGTGCCTCGGAC  
GGCCGGCACTTAGCGTGTTTGTGCTTTTGTCTCATTTTCTCTTTACCTCATTAACCTCAAATGAGTTTTGAT  
TTAATTTAGCGGCCAGCGCCTGGACCTCGCGGGCAGCGTCGCCCTCGGGTTCTGATTCAGAACGGTTG  
TGCCGGCGGGCAGTGCCTGGGTAGCTCACGCGCTGCGTGATACGGGACTCAAGAATGGGCAGCTCGTA  
CCCAGCCAGCGCCTCGGCAACCTCACCGCCGATGCGCGTGCCTTTGATCGCCCGGACACGACAAAGGCC

GCTTGTAGCCTTCCATCCGTGACCTCAATGCGCTGCTTAACCAGCTCCACCAGGTCGGCGGTGGCCATA  
TGTCGTAAGGGCTTGGCTGCACCGGAATCAGCACGAAGTCGGCTGCCTTGATCGCGGACACAGCCAAGTC  
CGCCGCTGGGGCGCTCCGTGATCACTACGAAGTCGCGCCGGCCGATGGCCTTACAGTCGCGGTCAATC  
GTCGGGCGGTGATGCCGACAACGGTTAGCGGTTGATCTTCCCGCACGGCCGCCAATCGCGGGCACTGC  
CCTGGGGATCGGAATCGACTAACAGAACATCGGCCCGGCGAGTTGCAGGGCGCGGGCTAGATGGGTTGC  
GATGGTCGTCTTGCCGTGACCCGCTTTCTGGTTAAGTACAGCGATAACCTTCATGCGTTCCCTTGCGTA  
TTTTGTTATTTACTCATCGCATCATATACGCAGCGACCGCATGACGCAAGCTGTTTTACTCAAATACACA  
TCACCTTTTTTAGACGGCGCGCTCGGTTTCTTCAGCGCCAAGCTGGCCGGCCAGGCCGCCAGCTTGGA  
TCAGACAAACCGCCAGGATTCATGCAGCCGCACGGTTGAGACGTGCGCGGGCGGCTCGAACACGTACC  
CGGCCGCGATCATCTCCGCTCGATCTCTTCGGTAATGAAAAACGGTTCGTCTGGCCGTCTGGTGCGG  
TTTTATGCTTGTTCCTCTTGGCGTTCATTTCTCGGCGGCCGCCAGGGCGTCCGGCTCGGTCAATGCGTCT  
CACGGAAGGCACCGCGCCGCTGGCTCGGTGGGCGTCACTTCCCTCGTGCCTCAAGTGCAGCGGTACAG  
GGTCGAGCGATGCACGCCAAGCAGTGCAGCCGCTCTTTCACGGTGCAGCCCTTCTGGTCGATCAGCTCG  
CGGGCGTGCAGGATCTGTGCCGGGGTGAGGGTAGGGCGGGGGCCAAACTTCACGCTCGGGCTTGGCGG  
CCTCGCGCCCGCTCCGGGTGCGGTGATGATTAGGGAACGCTCGAACTCGGCAATGCCGGCGAACACGGT  
CAACACCATGCGGCCGGCCGGCGTGGTGGTGTGCGGCCACGGCTCTGCCAGGCTACGCAGGCCCGCGCCG  
GCCTCCTGGATGCGCTCGGCAATGTCCAGTAGGTGCGGGGTGCTGCGGGCCAGGCGGTCTAGCCTGGTCA  
CTGTCAACAACGTCGCCAGGGCGTAGGTGGTCAAGCATCTGGCCAGCTCCGGGCGGTGCGGCTGGTGCC  
GGTGATCTTCTCGAAAAACAGCTTGGTGCAGCCGGCCGCGTGCAGTTCGGCCCGTTGGTTGGTCAAGTCC  
TGGTCGTCGGTGCTGACGCGGGCATAGCCCAGCAGGCCAGCGGCGGCGCTCTTGTTCATGGCGTAATGTC  
TCCGGTTCTAGTCGCAAGTATTTACTTTATGCGACTAAAACACGCGACAAGAAAACGCCAGGAAAAGGG  
CAGGGCGGCAGCCTGTGCGTAACTTAGGACTTGTGCGACATGTCGTTTTTCAGAAGACGGCTGCACTGAA  
CGTCAGAAGCCGACTGCACTATAGCAGCGGAGGGGTTGGATCAAAGTACTTTGATCCCGAGGGGAACCTT  
GTGGTTGGCATGCACATACAAATGGACGAACGGATAAACCTTTTCACGCCCTTTTAAATATCCGTTATTC  
TAATAAACGCTCTTTTCTCTTAGG**tttaccgccaatatatcctgtca**AACACTGATAGTTTAAACTGAA  
GGCGGGAAACGACAATCTGATCCAAGCTCAAGCTGCTCTAGCATTCGCCATTCAGGCTGCGCAACTGTTG  
GGAAGGGCGATCGGTGCGGGCTCTTCGCTATTACGCCAGCTGGCGAAAGGGGGATGTGCTGCAAGGCGA  
TTAAGTTGGGTAAACGCCAGGGTTTTCCAGTCACGACGTTGTAAAACGACGGCCAGTGCCAAGCTTGGCG  
TGCTGCA**GGTCAACATGGTGGAGCACGACACACTTGTCTACTCCAAAAATATCAAAGATACAGTCTCAG  
AAGACCAAAGGGCAATTGAGACTTTTCAACAAAGGGTAATATCCGAAACCCTCCTCGGATTCATTGCC  
AGCTATCTGTCACTTTATTTGGAAGATAGTGAAAAGGAAGGTGGCTCCTACAAATGCCATCATTTGGAT  
AAAGGAAAAGCCATCGTTGAAGATGCCTCTGCCGACAGTGGTCCCAAAGATGGACCCCAACCCACGAGGA  
GCATCGTGAAAAAGAAGACGTTCCAACCAGTCTTCAAAGCAAGTGGATTGATGTGATAACATGGTGG**

GCACGACACACTTGTCTACTCCAAAAATATCAAAGATACAGTCTCAGAAGACCAAAGGGCAATTGAGACT  
TTTCAACAAAAGGGTAATATCCGGAAACCTCCTCGGATTCCATTGCCAGCTATCTGTCACTTTATTGTGA  
AGATAGTGAAAAAGGAAGGTGGCTCCTACAAATGCCATCATTCGCGATAAAGGAAAGGCCATCGTTGAAGA  
TGCTCTGCCGACAGTGGTCCCAAAGATGGACCCCCACCCACGAGGAGCATCGTGAAAAAGAAGACGTT  
CCAACCACGTCTTCAAAGCAAGTGGATTGATGTGATATCTCCACTGACGTAAGGGATGACGCACAATCCC  
ACTATCCTTCGCAAGACCCTTCCTCTATATAAGGAAGTTCATTTTCATTTGGAGAGGACCTCGACTCTAGA  
GGATCCCCGGGTACCGGGCCCCCTCGAGGCGCGCAAGCTATCAAACAAGTTTGTACAAAAAAGCAGG  
CTCCGCGGCCGCCCTTCACCCCTTCACCAAACCTAAACCTAAACGGCTAAGCCCGACGTCAAATACCA  
AAAAGAGAAAAACAAGAGCGCCGTCAAGCTCTGCAAATACGATCTGTAAGTCCATCTTAACACAAAAGTG  
AGATGGGTTCTTAGATCATGTTCCGCCGTTAGATCGAGTCATGGTCTTGTCTCATAGAAAGGTACTTTTCG  
TTTACTTCTTTTGTAGTATCGAGTAGAGCGTCGTCTATAGTTAGTTTGTAGATTGCGTTTGTGAGAAGTTAG  
GTTCAATGTCCCGGTCCAATTTTACCAGCCATGTGTGAGTTTCGTTCCCTCCCGTCCCTCTTCTTTGATT  
TCGTTGGGTTACGGATGTTTTCGAGATGAAACAGCATTGTTTTTGTTGTGATTTTTCTCTACAAGCGAATA  
GACCATTTATCGGTGGATCTTAGAAAAATTAAGAGACCATTAGGCACCCCAGGCTTTACACTTTATGCTTC  
CGGCTCGTATAATGTGTGGATTTTGTAGTTAGGAGCCGTCGAGATTTTCAGGAGCTAAGGAAGCTAAAatg  
gagaaaaaatcactggatataaccaccggtgatataatccaatggcatcgtaagaacatthttgaggcat  
ttcagtcagttgctcaatgtacctataaccagaccggtcagctggatattacggcctthtttaagaccgt  
aaagaaaaataagcacaagthttatccggcctthttacattcttgccgcctgatgaatgctcatccg  
gagttccgatggcaatgaaagacggtgagctggtgatatgggatagtggtcacccttgttacaccgtht  
tccatgagcaaaactgaaacgthttcatcgctctggagtgaataaccacgacgatttccggcagthttctaca  
catatattcgcaagatgtggcgtgttacggtgaaaacctggcctatthccctaaaggthttattgagaat  
atgthttctgctcagccaatccctgggtgagthttcaccagthttgatttaaacgtggccaatatggaca  
acttcttgcctccgthttcaccatgggcaaatattatacgcaaggcgacaagtgctgatgccgctggc  
gattcaggttcatcatgccgthttgtgatggcttccatgtcggcagaatgcttaatgaattacaacagtac  
tgcgatgagtgccagggcgggcgtaaACGCGTGGAGCCGGCTTACTAAAAGCCAGATAACAGTATGCGT  
ATTTGCGCGCTGATTTTTGCGGTATAAGAAATATATACTGATATGTATACCCGAAGTATGTCAAAAAGAGG  
TATGCTATGAAGCAGCGTATTACAGTGACAGTTGACAGCGACAGCTATCAGTTGCTCAAGGCATATATGA  
TGTC AATATCTCCGGTCTGGTAAGCACAACCATGCAGAATGAAGCCCGTCGTCTGCGTGCCGAACGCTGG  
AAAGCGGAAAAATCAGGAAGGGATGGCTGAGGTCGCCCGGTTTATTGAAATGAACGGCTCTTTTGTGACG  
AGAACAGGGGCTGGTGAAATGCAGTTTAAGGTTTACACCTATAAAAGAGAGAGCCGTTATCGTCTGTTTG  
TGGATGTACAGAGTGATATTATTGACACGCCCGGCCGACGGATGGTGATCCCCCTGGCCAGTGCACGTCT  
GCTGTGAGATAAAGTCTCCCGTGAACTTTACCCGGTGGTGCATATCGGGGATGAAAGCTGGCGCATGATG  
ACCACCGATATGGCCAGTGTGCCGGTTTCCGTTATCGGGGAAGAAGTGGCTGATCTCAGCCACCGCGAAA



ATGACATCAAAAACGCCATTAACCTGATGTTCTGGGGAATATAAATGTCAGGCTCCCTTATACACAGCCA  
GTCTGCACCTCGACggtctcAgaactagaaaagacattggacatattccaggatgcaaaaagaaaaca  
tgaatattgTTTTgaatgtgttcaagtaaatgagattttcaagtcgtctaaagaacagttgctaatacag  
ttacttatttcaataaataattggttctaataatacaaaacatattcgaggatgcaagaaaaagatg  
tttgttattttgaaaagcttgagtagtttctctccgaggtgtagcgaagaagcatcatctactttgtaat  
gtaattttctttatgTTTTcactttgtaattttatttgtgtaatgtaccatggccgatatcggtttat  
tgaagaaaaattatgttacttctgttttggctttgcaatcagttatgctagttttcttataccctttcg  
taagcttcctaaggaatcgttcattgatttccactgcttcattgtatattaaactttacaactgtatcg  
accatcatataattctgggtcaagagatgaaaatagaacaccacatcgtaaagtgaatAAGGGTGGGGC  
CGCCGACCAGCTTTCTTGTACAAAGTGGTTCGATAAATTCCTTAATTAAGTCTAGAGCGGCCGCC  
ACCGCGGTGGAGCTCGAATTTCCCGATCGTTCAAACATTTGGCAATAAAGTTTCTTAAGATTGAATCCT  
GTTGCCGGTCTTGCATGATTATCATATAAATTTCTGTTGAATTACGTTAAGCATGTAATAATTAACATGT  
AATGCATGACGTTATTTATGAGATGGGTTTTTATGATTAGAGTCCCGCAATTATACATTTAATACGCGAT  
AGAAAACAAAATATAGCGCGCAAACCTAGGATAAATTATCGCGCGCGGTGTCATCTATGTTACTGAATTCG  
TAATCATGGTCATAGCTGTTTCTGTGTGAAATGTTATCCGCTCACAATTCACACAACATACGAGCCG  
GAAGCATAAAGTGTAAGCCTGGGGTGCCTAATGAGTGAGCTAACTCACATTAATTGCGTTGCGCTCACT  
GCCCCGTTTTCCAGTCGGGAAACCTGTCGTGCCAGCTGCATTAATGAATCGGCCAACGCGCGGGGAGAGGC  
GGTTTGCATATTGGCTAGAGCAGCTTGCCAACATGGTGGAGCAGACACTCTCGTCTACTCCAAGAATAT  
CAAAGATACAGTCTCAGAAGACCAAAGGGCTATTGAGACTTTTCAACAAAGGGTAATATCGGGAAACCTC  
CTCGGATTCCATTGCCAGCTATCTGTCACTTTCATCAAAGGACAGTAGAAAAGGAAGGTGGCACCTACA  
AATGCCATCATTGCGATAAAGGAAAGGCTATCGTTCAAGATGCCCTGCGGACAGTGGTCCCAAAGATGG  
ACCCACCCACGAGGAGCATCGTGAAAAAGAAGACGTTCCAACCACGCTTCAAAGCAAGTGGATTGA  
TGTGATAACatggtggagcagcactctcgtctactccaagaatatcaagatacagctctcagaagacc  
aaagggctattgagacttttcaacaaagggtaatatcgggaaacctcctcgattccattgccagctat  
ctgtcacttcatcaaaaggacagtagaaaaggaaggtggcacctacaatgccatcattgcgataaagga  
aaggctatcgttcaagatgcctctgccgacagtggtcccaagatggacccccaccagaggagcatcg  
tggaaaaagaagacgttccaaccagctcttcaagcaagtggattgatgtgatatctccactgacgtaag  
ggatgacgcacaatcccactatccttcgcaagacctcctctatataaggaagttcatttcatttgaga  
ggACACGCTGAAATCACAGTCTCTCTACAAATCTATCTCTCGAGCTTTCGAGATCCCGGGGGC  
AATGAGATATGAAAAAGCCTGAACTCACCGGACGCTGTCGAGAAGTTTCTGATCGAAAAGTTTCGACAG  
CGTCTCCGACCTGATGCAGCTCTCGGAGGGCGAAGAATCTCGTGCTTTTCAGCTTCGATGTAGGAGGGCGT  
GGATATGTCTCGGGTAAATAGCTGCGCCGATGGTTTTCTACAAAGATCGTTATGTTTATCGGCACTTTTG  
CATCGGCCGCGCTCCCGATTCCGGAAGTGCTTGACATTGGGGAGTTTAGCGAGAGCCTGACCTATTGCAT

CTCCCGCCGTGCACAGGGTGTACGTTGCAAGACCTGCCTGAAACCGAACTGCCCCGTGTTCTACAACCG  
GTCGCGGAGGCTATGGATGCGATCGCTGCGGCCGATCTTAGCCAGACGAGCGGGTTTCGGCCCATTCGGAC  
CGCAAGGAATCGGTCAATACACTACATGGCGTGATTTTCATATGCGCGATTGCTGATCCCCATGTGTATCA  
CTGGCAAACCTGTGATGGACGACACCGTCAGTGCGTCCGTCGCGCAGGCTCTCGATGAGCTGATGCTTTGG  
GCCGAGGACTGCCCCGAAGTCCGGCACCTCGTGACGCGGATTTTCGGCTCCAACAATGTCTTGACGGACA  
ATGGCCGCATAACAGCGGTCAATGACTGGAGCGAGGCGATGTTTCGGGGATTCCCAATACGAGGTCGCCAA  
CATCTTCTTCTGGAGGCCGTGGTTGGCTTGTATGGAGCAGCAGACGCGCTACTTCGAGCGGAGGCATCCG  
GAGCTTGCAGGATCGCCACGACTCCGGGCGTATATGCTCCGCATTGGTCTTGACCAACTCTATCAGAGCT  
TGGTTGACGGCAATTTTCGATGATGCAGCTTGGGCGCAGGGTCGATGCGACGCAATCGTCCGATCCGGAGC  
CGGGACTGTCGGGCGTACACAAATCGCCCGCAGAAGCGCGGCCGCTCTGGACCGATGGCTGTGTAGAAGTA  
CTCGCCGATAGTGGAACCGACGCCCCAGCACTCGTCCGAGGGCAAAGAAATAGAGTAGATGCCGACCGG  
ATCTGTCGATCGACAAGCTCGAGtttctccataataatgtgtgagttagttccagataaggggaattaggg  
ttcctatagggtttcgctcatgtgttgagcatataaagaacccttagtatgtattttgtaaaata  
cttctatcaataaaaatttctaattcctaaaaccaaaatccagtaactaaaatccagatcCCCCGAATTAAT  
TCGGCGTTAATTCAGTACATTA AAAACGTCGCAATGTGTTATTAAGTTGTCTAAGCGTCAATT **TGTTTA**  
**CACCACAATATATCCTGCCA**

brown/lowercase: kanamycin resistance gene

CYAN/UPPERCASE/UNDERLINED: C->A transversion to block vector's BsaI site

cyan/lowercase: T-DNA right border

GREEN/UPPERCASE: 2x35S CaMV promoter

ORANGE/UPPERCASE: attB1

BLUE/UPPERCASE: *AtTAS1c* 5' region

RED/UPPERCASE: *BsaI* site

magenta/lowercase: chloramphenicol resistance gene

MAGENTA/UPPERCASE: *ccdB* gene

red/lowercase: inverted *BsaI* site

blue/lowercase: *AtTAS1c* 3' region

ORANGE/UPPERCASE/UNDERLINED: attB2

GREY/UPPERCASE/UNDERLINED: Nos terminator

green/lowercase: CaMV promoter

BROWN/UPPERCASE: hygromycin resistance gene

green/lowercase/underlined: CaMV terminator

CYAN/UPPERCASE: T-DNA left border

**>pMDC123SB-AtTAS1c-B/c (12017 bp)**

CCAGCCAGCCAACAGCTCCCCGACCGGCAGCTCGGCACAAAATCACCACCTCGATACAGGCAGCCCATCAG  
TCCGGGACGGCGTCAGCGGGAGAGCCGTTGTAAGGCGGCAGACTTTGCTCATGTTACCGATGCTATTCGG  
AAGAACGGCAACTAAGCTGCCGGGTTTGAAACACGGATGATCTCGCGGAGGGTAGCATGTTGATTGTAAC  
GATGACAGAGCGTTGCTGCCTGTGATCACCGCGGTTTCAAAAATCGGCTCCGTCGATACTATGTTATACGC  
CAACTTTGAAAACAACTTTGAAAAAGCTGTTTTCTGGTATTTAAGGTTTTAGAAATGCAAGGAACAGTGAA  
TTGGAGTTCGTCTTGTATAATTAGCTTCTTGGGGTATCTTTAAATACTGTAGAAAAGAGGAAGGAAATA  
ATAAatggctaaaatgagaatatcaccggaattgaaaaactgatcgaaaaataccgctgcgtaaaagat  
acggaaggaatgtctcctgctaaggtatataagctggtgggagaaaatgaaaacctatattttaaagatga  
cggacagccggtataaagggaccacctatgatgtggaacgggaaaaggacatgatgctatggctggaagg  
aaagctgcctgttccaaaggtcctgcactttgaacggcatgatggctggagcaatctgctcatgagtgag  
gccgatggcgtcctttgctcgggaagatgaagatgaacaaagccctgaaaagattatcgagctgtatg  
cggagtgcacaggtcctttcactccatcgacatatcggattgtccctatacgaatagcttagacagccg  
cttagccgaattggattacttactgaataacgatctggccgatgtggattgcgaaaactgggaagaagac  
actccatttaaagatccgcgcgagctgtatgatttttaagacggaaaagcccgaagaggaacttgtct  
tttcccacggcgacctgggagacagcaacatctttgtgaaagatggcaaagtaagtggctttattgatct  
tgggagaagcggcagggcggacaagtggatgacattgccttctgcgtccggtcgatcagggaggatatac  
ggggaagaacagatgtcgcagctattttttgacttactggggatcaagcctgattgggagaaaataaaat  
attatattttactggatgaattgttttagTACCTAGAATGCATGACCAAAAATCCCTTAACGTGAGTTTTTC  
GTTCCACTGAGCGTCAGACCCCGTAGAAAAGATCAAAGGATCTTCTTGAGATCCTTTTTTTCTGCGCGTA  
ATCTGCTGCTTGCAAAACAAAAAACACCGCTACCAGCGTGGTTTTGTTTGCCGGATCAAGAGCTACCAA  
CTCTTTTTCCGAAGGTAACCTGGCTTCAGCAGAGCGCAGATACCAAATACTGTCTTCTAGTGTAGCCGTA  
GTTAGGCCACCACTTCAAGAACTCTGTAGCACCGCTACATACCTCGCTCTGCTAATCTGTTACCAGTG  
GCTGCTGCCAGTGGCGATAAGTCGTGCTTACCGGGTTGGACTCAAGACGATAGTTACCAGGATAAGGCGC  
AGCGGTCCGGCTGAACGGGGGGTTCGTGCACACAGCCCAGCTTGGAGCGAACGACCTACACCGAACTGAG  
ATACCTACAGCGTGAGCTATGAGAAAAGCGCCACGCTTCCCGAAGGGAGAAAGGCGGACAGGTATCCGGTA  
AGCGGCAGGGTCGGAACAGGAGAGCGCACGAGGGAGCTTCCAGGGGAAACGCCCTGGTATCTTTATAGTC  
CTGTCCGGTTTTGCCACCTCTGACTTGAGCGTCGATTTTTGTGATGCTCGTCAGGGGGGCGGAGCCTATG  
GAAAAACGCCAGCAACCGGGCTTTTTACGGTTCCTGGCCTTTTGTGCTGGCCTTTTGTCTCACATGTTCTTT  
CCTGCGTTATCCCCCTGATTCTGTGGATAACCGTATTACCGCCTTTGAGTGAGCTGATACCGCTCGCCGCA  
GCCGAACGACCGAGCGCAGCGAGTCAGTGAGCGAGGAAGCGGAAGAGCGCCTGATGCGGTATTTTCTCCT  
TACGCATCTGTGCGGTATTTACACCCGCATATGGTGCACCTCAGTACAATCTGCTCTGATGCCGCATAG  
TTAAGCCAGTATACACTCCGCTATCGCTACGTGACTGGGTCATGGCTGCGCCCCGACACCCGCCAACACC

CGCTGACGCGCCCTGACGGGCTTGTCTGCTCCCGGCATCCGCTTACAGACAAGCTGTGACCGTCTCCGGG  
AGCTGCATGTGTCAGAGGTTTTACCCGTCATCACCGAAACGCGCGAGGCAGGGTGCCTTGATGTGGGCGC  
CGCGGTCGAGTGGCGACGGCGGGCTTGTCCGCGCCCTGGTAGATTGCCGGCCGTAGGCCAGCCATTT  
TTGAGCGGCCAGCGGCCGCGATAGGCCGACGCGAAGCGGCGGGGCGTAGGGAGCGCAGCGACCGAAGGGT  
AGGCGCTTTTTGACAGCTCTTCGGCTGTGCGCTGGCCAGACAGTTATGCACAGGCCAGGCGGGTTTTAAGA  
GTTTTAATAAGTTTTAAAGAGTTTTAGGCGGAAAAATCGCCTTTTTTCTCTTTTATATCAGTCACTTACA  
TGTGTGACCGGTTCCCAATGTACGGCTTTGGGTTCCCAATGTACGGGTTCCGGTTCCCAATGTACGGCTT  
TGGGTTCCCAATGTACGTGCTATCCACAGGAAAGAGAACTTTTCGACCTTTTTCCCTGCTAGGGCAATT  
TGCCCTAGCATCTGCTCCGTACATTAGGAACCGGCGGATGCTTCGCCCTCGATCAGGTTGCGGTAGCGCA  
TGACTAGGATCGGGCCAGCCTGCCCCGCTCCTCCTTCAAATCGTACTCCGGCAGGTCATTTGACCCGAT  
CAGCTTGCACACGGTGAAACAGAACTTCTTGAACCTCCTCGGCGCTGCCACTGCGTTTCGTAGATCGTCTTG  
AACAAACCATCTGGCTTCTGCCTTGCTGCGGCGGGCGTGCAGGCGGTAGAGAAAACGGCCGATGCCGG  
GATCGATCAAAAAGTAATCGGGGTGAACCGTCAGCACGTCCGGGTTCTTGCCTTCTGTGATCTCGCGGTA  
CATCCAATCAGCTAGCTCGATCTCGATGTACTCCGGCCGCCCCGTTTCGCTCTTTACGATCTTGTAGCGG  
CTAATCAAGGCTTCACCCTCGGATACCGTCACCAGGCGGCCGTTCTTGGCCTTCTTCGTACGCTGCATGG  
CAACGTGCGTGGTGTTTAACCGAATGCAGGTTTCTACCAGGTCGTCTTTCTGCTTTCCGCCATCGGCTCG  
CCGGCAGAACTTGAGTACGTCCGCAACGTGTGGACGGAACACGCGGCCGGGCTTGTCTCCCTTCCCTTCC  
CGGTATCGGTTTCATGGATTTCGGTTAGATGGGAAACCGCCATCAGTACCAGGTCGTAATCCCACACACTGG  
CCATGCCGGCCGGCCCTGCGGAAACCTCTACGTGCCCGTCTGGAAGCTCGTAGCGGATCACCTCGCCAGC  
TCGTGCGGTCACGCTTCGACAGACGGGAAACGGCCACGTCCATGATGCTGCGACTATCGCGGGTGCCACG  
TCATAGAGCATCGGAACGAAAAATCTGGTTGCTCGTCGCCCTTGGGCGGCTTCCTAATCGACGGCGCAC  
CGGCTGCCGGCGGTTGCCGGGATTTCTTTCGGGATTCGATCAGCGGCCGCTTGCCACGATTCACCGGGCG  
TGCTTCTGCCTCGATGCGTTGCCGCTGGGCGGCCCTGCGCGGCCCTTCAACTTCTCCACCAGGTCATACCC  
AGCGCCGCGCCGATTTGTACCGGGCCGATGGTTTGCACCGTACGCGGATTCCTCGGGCTTGGGGGTT  
CCAGTGCCATTGCAGGGCCGGCAGACAACCCAGCCGCTTACGCCCTGGCCAACCGCCCGTTCCCTCCACACA  
TGGGGCATTCCACGGCGTCGGTGCCTGGTTGTTCTTGATTTTCCATGCCGCCTCCTTTAGCCGCTAAAAAT  
TCATCTACTCATTATTCATTTGCTCATTACTCTGGTAGCTGCGCGATGTATTAGATAGCAGCTCGGT  
AATGGTCTTGCCTTGGCGTACCGCGTACATCTTCAGCTTGGTGTGATCCTCCGCCGGCAACTGAAAGTTG  
ACCCGCTTCATGGCTGGCGTGTCTGCCAGGCTGGCCAACGTTGCAGCCTTGCTGCTGCGTGCCTCGGAC  
GGCCGGCACTTAGCGTGTTTGTGCTTTTGTCTCATTCTCTTTACCTCATTAACCTCAAATGAGTTTTGAT  
TTAATTTAGCGGCCAGCGCCTGGACCTCGCGGGCAGCGTCGCCCTCGGGTTCTGATTCAGAACGGTTG  
TGCCGGCGGGCAGTGCCTGGGTAGCTCACGCGCTGCGTGATACGGGACTCAAGAATGGGCAGCTCGTA  
CCCAGCCAGCGCCTCGGCAACCTCACCGCCGATGCGCGTGCCTTTGATCGCCCGGACACGACAAAGGCC

GCTTGTAGCCTTCCATCCGTGACCTCAATGCGCTGCTTAACCAGCTCCACCAGGTCGGCGGTGGCCATA  
TGTCGTAAGGGCTTGGCTGCACCGGAATCAGCACGAAGTCGGCTGCCTTGATCGCGGACACAGCCAAGTC  
CGCCGCTGGGGCGCTCCGTGATCACTACGAAGTCGCGCCGGCCGATGGCCTTACGTCGCGGTCAATC  
GTCGGGCGGTGATGCCGACAACGGTTAGCGGTTGATCTTCCCGCACGGCCGCCAATCGCGGGCACTGC  
CCTGGGGATCGGAATCGACTAACAGAACATCGGCCCGGCGAGTTGCAGGGCGCGGGCTAGATGGGTTGC  
GATGGTCGTCTTGCCGTGACCCGCTTTCTGGTTAAGTACAGCGATAACCTTCATGCGTTCCCTTGCGTA  
TTTTGTTATTTACTCATCGCATCATATACGCAGCGACCGCATGACGCAAGCTGTTTTACTCAAATACACA  
TCACCTTTTTTAGACGGCGCGCTCGGTTTCTTCAGCGCCAAGCTGGCCGGCCAGGCCGCGCAGCTTGGA  
TCAGACAAACCGCCAGGATTCATGCAGCCGCACGGTTGAGACGTGCGCGGGCGGCTCGAACACGTACC  
CGGCCGCGATCATCTCCGCTCGATCTCTTCGGTAATGAAAAACGGTTCGTCTGGCCGTCTGGTGCGG  
TTTTATGCTTGTTCCTCTTGGCGTTCATTTCTCGGCGGCCGCCAGGGCGTCGGCCTCGGTCAATGCGTCT  
CACGGAAGGCACCGCGCCGCTGGCTCGGTGGGCGTCACTTCCCTCGCTGCGCTCAAGTGCAGCGGTACAG  
GGTCGAGCGATGCACGCCAAGCAGTGCAGCCGCTCTTTCACGGTGCAGCCCTTCTGGTTCGATCAGCTCG  
CGGGCGTGCGGATCTGTGCCGGGGTGAGGGTAGGGCGGGGGCCAAACTTCACGCCTCGGGCCTTGGCGG  
CCTCGCGCCCGCTCCGGGTGCGGTGATGATTAGGGAACGCTCGAACTCGGCAATGCCGGCGAACACGGT  
CAACACCATGCGGCCGGCCGGCGTGGTGGTGTGCGGCCACGGCTCTGCCAGGCTACGCAGGCCCGCGCCG  
GCCTCCTGGATGCGCTCGGCAATGTCCAGTAGGTGCGGGGTGCTGCGGGCCAGGCGGTCTAGCCTGGTCA  
CTGTCAACAACGTCGCCAGGGCGTAGGTGGTCAAGCATCTGGCCAGCTCCGGGCGGTGCGCCTGGTGCC  
GGTGATCTTCTCGAAAAACAGCTTGGTGCAGCCGGCCGCGTGCAGTTCGGCCCGTTGGTTGGTCAAGTCC  
TGGTCGTCGGTGCTGACGCGGGCATAGCCCAGCAGGCCAGCGGCGGCGCTCTTGTTCATGGCGTAATGTC  
TCCGGTTCTAGTCGCAAGTATTTACTTTATGCGACTAAAACACGCGACAAGAAAACGCCAGGAAAAGGG  
CAGGGCGGCAGCCTGTGCGTAACTTAGGACTTGTGCGACATGTGCTTTTCAGAAGACGGCTGCACTGAA  
CGTCAGAAGCCGACTGCACTATAGCAGCGGAGGGGTTGGATCAAAGTACTTTTGATCCCGAGGGGAACCT  
GTGGTTGGCATGCACATACAAATGGACGAACGGATAAACCTTTTCACGCCCTTTTAAATATCCGTTATTC  
TAATAAACGCTCTTTTCTCTTAGG**tttaccgccaatatatcctgtca**AACACTGATAGTTTAAACTGAA  
GGCGGGAAACGACAATCTGATCCAAGCTCAAGCTGCTCTAGCATTCGCCATTCAGGCTGCGCAACTGTTG  
GGAAGGGCGATCGGTGCGGGCCTCTTCGCTATTACGCCAGCTGGCGAAAGGGGGATGTGCTGCAAGGCGA  
TTAAGTTGGGTAAACGCCAGGGTTTTCCAGTCACGACGTTGTAAAACGACGGCCAGTGCCAAGCTTGCAT  
GCCTGCA**GGTCAACATGGTGGTGCACGACACACTTGTCTACTCCAAAAATATCTTTGATACAGTCTCAGA  
AGACCAAAGGGCAATTGAGACTTTTCAACAAAGGGTAATATCCGAAACCCTCTCGGATTCATTTGCCCA  
GCTATCTGTCACTTTATTTGTAAGATAGTGAAAAAGGAAGGTGGCTCCTACAAATGCCATCATTGCGATA  
AAGGAAAGGCCATCGTTGAAGATGCCCTCTGCCGACAGTGGTCCCAAAGATGGACCCCCACCCACGAGGAG  
CATCGTGGAAAAAGAAGACGTTCCAACCACGCTTCAAAGCAAGTGGATTGATGTGATAACATGGTGGAG**

CACGACACACTTGTCTACTCCAAAAATATCAAAGATACAGTCTCAGAAGACCAAAGGGCAATTGAGACTT  
TTCAACAAAAGGGTAATATCCGGAAACCTCCTCGGATTCATTGCCAGCTATCTGTCACTTTATTGTGAA  
GATAGTGGAAAAGGAAGGTGGCTCCTACAAATGCCATCATTCGCATAAAGGAAAGGCCATCGTTGAAGAT  
GCCTCTGCCGACAGTGGTCCCAAAGATGGACCCCCACCCACGAGGAGCATCGTGGAAAAAGAAGACGTTT  
CAACCACGTCTTCAAAGCAAGTGGATTGATGTGATATCTCCACTGACGTAAGGGATGACGCACAATCCCA  
CTATCCTTCGCAAGACCTTCTCTATATAAGGAAGTTCATTTTCATTTGGAGAGGACCTCGACTCTAGAG  
GATCCCGGGTACCGGGCCCCCTCGAGGCGCGCAAGCTATCAAACAAGTTTGTACAAAAAAGCAGGC  
TCCGCGGCCGCCCTTACCAAAACCTAAACCTAAACGGCTAAGCCCGACGTCAAATACCAAAAAGAGAA  
AAACAAGAGCGCCGTCAAGCTCTGCAAATACGATCTGTAAGTCCATCTTAACACAAAAGTGAGATGGGT  
CTTAGATCATGTTCCGCCGTTAGATCGAGTCATGGTCTTGTCTCATAGAAAGGTACTTTCGTTTACTTCT  
TTTGAGTATCGAGTAGAGCGTCGTCTATAGTTAGTTTGAGATTGCGTTTGTGTCAGAAGTTAGGTTCAATGT  
CCCGGTCCAATTTTACCAGCCATGTGTCAGTTTCGTTCCCTCCCGTCCCTTCTTTGATTTTCGTTGGGT  
TACGGATGTTTTGAGATGAAACAGCATTTGTTTTGTTGTGATTTTTCTCTACAAGCGAATAGACCATTTA  
TCGGTGGATCTTAGAAAAATTAAAGAGACCATTAGGCACCCAGGCTTTACACTTTATGCTTCCGGCTCGTA  
TAATGTGTGGATTTTGTAGTTAGGAGCCGTCGAGATTTTCAGGAGCTAAGGAAGCTAAAatgggaaaaaa  
atcactggatataaccaccgttgatataatcccaatggcatcgtaagaacatthttgaggcatttcagtcag  
ttgtcaatgtacctataaccagaccgttcagctggatattacggcctthtttaagaccgtaagaaaa  
taagcacaagthttatccggcctthttcacattcttgcccgcctgatgaatgctcatccggagttccgt  
atggcaatgaaagacggtgagctggtgatatgggatagtggtcacccttgttacaccgthttccatgagc  
aaactgaaacgthttcatcgctctggagtgaataaccacgacgatttcggcagthttctacacatatattc  
gcaagatgtggcgtgttacggtgaaaacctggcctatthccctaaaggthttattgagaatagthtttc  
gtctcagccaatccctgggtgagthttcaccagthttgatttaaactggccaatatggacaacttcttcg  
ccccgthttcaccatgggcaaatattatcgcgaaggcgacaagtgctgatgccgctggcgattcaggt  
tcatcatgccgthttgtgatggcttccatgtcggcagaatgcttaatgaattacaacagtactgcgatgag  
tggcagggcggggcgtaaACGCGTGGAGCCGGCTTACTAAAAGCCAGATAACAGTATGCGTATTTGCGCG  
CTGATTTTTGCGGTATAAGAATATATACTGATATGTATACCCGAAGTATGTCAAAAAGAGGTATGCTATG  
AAGCAGCGTATTACAGTGACAGTTGACAGCGACAGCTATCAGTTGCTCAAGGCATATATGATGTCAATAT  
CTCCGGTCTGGTAAGCACCAACCATGCAGAAATGAAGCCCGTCGTCTGCGTGCCGAACGCTGGAAAGCGGAA  
AATCAGGAAGGGATGGCTGAGGTCGCCCCGTTTATTGAAATGAACGGCTCTTTTGTGCTGACGAGAACAGGG  
GCTGGTGAAATGCAGTTTAAGTTTACACCTATAAAAGAGAGAGCCGTTATCGTCTGTTTGTGGATGTAC  
AGAGTGATATTATTGACACGCCCGGCCGACGGATGGTGATCCCCCTGGCCAGTGCACGTCTGCTGTCAGA  
TAAAGTCTCCCGTGAACCTTACC CGGTGGTGCATATCGGGGATGAAAGCTGGCGCATGATGACCACCGAT  
ATGGCCAGTGTGCCGGTTTCCGTTATCGGGGAAGAAGTGCTGATCTCAGCCACCGCGAAAATGACATCA

AAAACGCCATTAACCTGATGTTCTGGGGAATATAAATGTCAGGCTCCCTTATACACAGCCAGTCTGCACC  
TCGACggtctcAGAACTAGAAAAGACATTGGACATATTCAGGATATGCAAAGAAAACAATGAATATTG  
TTTTGAATGTGTTCAAGTAAATGAGATTTTCAAGTCGCTAAAGAACAGTTGCTAATACAGTTACTTATT  
TCAATAAATAATTGGTTCTAATAATACAAAACATATTCGAGGATATGCAGAAAAAAGATGTTTGTATT  
TTGAAAAGCTTGAGTAGTTTCTCTCCGAGGTGTAGCGAAGAAGCATCATCTACTTTGTAATGTAATTTTC  
TTTATGTTTTCACTTTGTAATTTTATTTGTGTTAATGTACCATGGCCGATATCGGTTTTATTGAAAGAAA  
ATTTATGTTACTTCTGTTTTGGCTTTGCAATCAGTTATGCTAGTTTTCTTATACCCTTTCGTAAGCTTCC  
TAAGGAATCGTTCATTGATTTCCACTGCTTCATTGTATATTAAACTTTACAACGTATCGACCATCATA  
TAATCTGGGTCAAGAGATGAAAATAGAACCACATCGTAAAGTAAATTAAGGGTGGGCGCGCCGACCC  
AGCTTTCTTGTACAAAAGTGGTTCGATAATTCCTTAATTAAC TAGTTCTAGAGCGGCCGCCACCGCGGTGG  
AGCTCGAATTTCCCGATCGTTCAAACATTTGGCAATAAAGTTTCTTAAGATTGAATCCTGTTGCCGGTC  
TTGCGATGATTATCATATAAATTTCTGTTGAATTACGTTAAGCATGTAATAATTAACATGTAATGCATGAC  
GTTATTTATGAGATGGGTTTTTATGATTAGAGTCCCGCAATTATACATTTAATACGCGATAGAAAACAAA  
ATATAGCGCGCAAAC TAGGATAAAATTATCGCGCGCGGTGTCATCTATGTTACTAGATCGGGAATTCGTAA  
TCATGGTCATAGCTGTTTCTGTGTGAAATGTTATCCGCTCACAATTCACACAACATACGAGCCGGAA  
GCATAAAGTGTAAGCCTGGGGTGCCTAATGAGTGAGCTAACTCACATTAATTGCGTTGCGCTCACTGCC  
CGCTTTCCAGTCGGGAAACCTGTCGTGCCAGCTGCATTAATGAATCGGCAACGCGCGGGGAGAGGCGGT  
TTGCGTATTGGCTAGAGCAGCTTGCCAACATGGTGGAGCAGACACTCTCGTCTACTCCAAGAATATCAA  
AGATACAGTCTCAGAAGACCAAAGGGCTATTGAGACTTTTCAACAAAGGGTAATATCGGGAACCTCCTC  
GGATTCCATTGCCAGCTATCTGTCACTTCATCAAAGGACAGTAGAAAAGGAAGGTGGCACCTACAAAT  
GCCATCATTGCGATAAAGGAAAGGCTATCGTTCAAGATGCCCTCTGCCGACAGTGGTCCCAAAGATGGACC  
CCCACCCACGAGGAGCATCGTGGAAAAAGAAGACGTTCCAACCACGCTTCAAAGCAAGTGGATTGATGT  
GATAACatggtggagcacgacactctcgctactccaagaatatcaagatacagtctcagaagaccaa  
gggctattgagacttttcaacaaggtaatatcggaacctcctcggattccattgccagctatctg  
tcacttcatcaaaaggacagtagaaaaggaaggtggcacctacaaatgcatcattgcgataaaggaaag  
gctatcgttcaagatgcctctgccgacagtggccccaaagatggacccccaccacgaggagcatcgtgg  
aaaaagaagacgttccaaccacgtcttcaaagcaagtgattgatgtgatatctccactgacgtaagga  
tgacgcacaatcccactatccttcgcaagaccttctctatataaggaagttcatttcatttgagaggA  
CACGCTGAAATCACCAGTCTCTCTCTACAAATCTATCTCTCTCGAGTCTACCATGAGCCAGAACGACGC  
CCGGCCGACATCCGCCGTGCCACCGAGGCGGACATGCCGGCGGTCTGCACCATCGTCAACCAC TACATCG  
AGACAAGCACGGTCAACTTCCGTACCGAGCCGACGGAACCGCAGGAGTGGACGGACGACCTCGTCCGTCT  
GCGGGAGCGCTATCCCTGGCTCGTCCGAGGTGGACGGCGAGGTCGCCGGCATCGCCTACGCGGGCCCC  
TGGAAGGCACGCAACGCCCTACGACTGGACGGCCGAGTCGACCGTGTACGTC TCCCCCGCCACCAGCGGA



CGGGACTGGGCTCCACGCTCTACACCCACCTGCTGAAGTCCCTGGAGGCACAGGGCTTCAAGAGCGTGGT  
CGCTGTCATCGGGCTGCCCAACGACCCGAGCGTGCGCATGCACGAGGCGCTCGGATATGCCCCCGCGGC  
ATGCTGCGGGCGGCCGGCTTCAAGCACGGGAACTGGCATGACGTGGGTTTCTGGCAGCTGGACTTCAGCC  
TGCCGGTACCGCCCCGTCCGGTCTCTGCCCGTCACCGAGATTTGACTCGAGtttctccataataatgtgtg  
agtagttcccagataaggggaattaggggttcctatagggtttcgctcatgtgttgagcatataaгааacc  
ttagtatgtatgttgtatgttgtaaaaatacttctatcaataaaaatttctaattcctaaaacccaaatccagt  
actaaaatccagatcCCCCGAATTAATTTCGGCGTTAATTCAGTACATTA AAAACGTCCGCAATGTGTTAT  
TAAGTTGTCTAAGCGTCAATTTGTTTACACCACAATATATCCTGCCA

brown/lowercase: kanamycin resistance gene

CYAN/UPPERCASE/UNDERLINED: C->A transversion to block vector's BsaI site

cyan/lowercase: T-DNA right border

GREEN/UPPERCASE: 2x35S CaMV promoter

ORANGE/UPPERCASE: attB1

BLUE/UPPERCASE: *AtTAS1c* 5' region

RED/UPPERCASE: *BsaI* site

magenta/lowercase: chloramphenicol resistance gene

MAGENTA/UPPERCASE: *ccdB* gene

red/lowercase: inverted *BsaI* site

blue/lowercase: *AtTAS1c* 3' region

ORANGE/UPPERCASE/UNDERLINED: attB2

GREY/UPPERCASE/UNDERLINED: Nos terminator

green/lowercase: CaMV promoter

BROWN/UPPERCASE/UNDERLINED: BASTA resistance gene

green/lowercase/underlined: CaMV terminator

CYAN/UPPERCASE: T-DNA left border

## SUPPLEMENTAL REFERENCES

- Ali I, Amin I, Briddon RW, Mansoor S** (2013) Artificial microRNA-mediated resistance against the monopartite begomovirus *Cotton leaf curl Burewala virus*. *Virol J* **10**: 231
- Alvarez JP, Pekker I, Goldshmidt A, Blum E, Amsellem Z, Eshed Y** (2006) Endogenous and synthetic microRNAs stimulate simultaneous, efficient, and localized regulation of multiple targets in diverse species. *Plant Cell* **18**: 1134-1151
- Eamens AL, Agius C, Smith NA, Waterhouse PM, Wang MB** (2011) Efficient silencing of endogenous microRNAs using artificial microRNAs in *Arabidopsis thaliana*. *Mol Plant* **4**: 157-170
- Liang G, He H, Li Y, Yu D** (2012) A new strategy for construction of artificial miRNA vectors in *Arabidopsis*. *Planta* **235**: 1421-1429
- Molnar A, Bassett A, Thuenemann E, Schwach F, Karkare S, Ossowski S, Weigel D, Baulcombe D** (2009) Highly specific gene silencing by artificial microRNAs in the unicellular alga *Chlamydomonas reinhardtii*. *Plant J* **58**: 165-174
- Montgomery TA, Howell MD, Cuperus JT, Li D, Hansen JE, Alexander AL, Chapman EJ, Fahlgren N, Allen E, Carrington JC** (2008) Specificity of ARGONAUTE7-miR390 interaction and dual functionality in TAS3 *trans*-acting siRNA formation. *Cell* **133**: 128-141
- Niu QW, Lin SS, Reyes JL, Chen KC, Wu HW, Yeh SD, Chua NH** (2006) Expression of artificial microRNAs in transgenic *Arabidopsis thaliana* confers virus resistance. *Nat Biotechnol* **24**: 1420-1428
- Qu J, Ye J, Fang R** (2007) Artificial microRNA-mediated virus resistance in plants. *J Virol* **81**: 6690-6699
- Schwab R, Ossowski S, Riester M, Warthmann N, Weigel D** (2006) Highly specific gene silencing by artificial microRNAs in *Arabidopsis*. *Plant Cell* **18**: 1121-1133
- Shi R, Yang C, Lu S, Sederoff R, Chiang VL** (2010) Specific down-regulation of PAL genes by artificial microRNAs in *Populus trichocarpa*. *Planta* **232**: 1281-1288
- Tang Y, Wang F, Zhao J, Xie K, Hong Y, Liu Y** (2010) Virus-based microRNA expression for gene functional analysis in plants. *Plant Physiol* **153**: 632-641

**Vu TV, Roy Choudhury N, Mukherjee SK** (2013) Transgenic tomato plants expressing artificial microRNAs for silencing the pre-coat and coat proteins of a begomovirus, Tomato leaf curl New Delhi virus, show tolerance to virus infection. *Virus Res* **172**: 35-45

**Zhao T, Wang W, Bai X, Qi Y** (2009) Gene silencing by artificial microRNAs in *Chlamydomonas*. *Plant J* **58**: 157-164
